# Supplementary material for: Lipophilic NHC assisted one-pot synthesis of syncarpamide analogues in aqueous medium
Source: Royal Society of Chemistry journal article supplement (doi:10.1039/c9nj00134d), 2019-01-01

# Supporting Information

## Lipophilic NHC Assisted One-pot Synthesis of Syncarpamide Analogues in Aqueous Medium

Pavithira Suresh,<sup>a</sup> and Subramaniapillai Selva Ganesan<sup>a\*</sup>

<sup>a</sup>Department of Chemistry, School of Chemical and Biotechnology, SASTRA Deemed University, Thanjavur-613401, Tamil Nadu, India, Fax: +91 (4362) 264120; E-mail: [selva@biotech.sastra.edu](mailto:selva@biotech.sastra.edu)

### Supporting information

Total number of pages: 102

#### Table of Context

| S No | Details                                                                                           | Page no  |
|------|---------------------------------------------------------------------------------------------------|----------|
| 1    | Materials                                                                                         | S2       |
| 2    | Synthesis of 4-nitrophenyl cinnamate                                                              | S3       |
| 3    | Synthesis of 3-Amino-3-phenylpropan-1-ol                                                          | S4       |
| 4    | Synthesis of symmetrically substituted analogues of syncarpamide derivatives using NHC catalyst.  | S5-S12   |
| 5    | Synthesis of Unsymmetrically substituted analogues of syncarpamide derivatives using NHC catalyst | S13-S14  |
| 6    | Synthesis of transesterification using NHC catalyst                                               | S14-S16  |
| 7    | Synthesis of transesterification of benzoin derivatives using NHC catalyst                        | S16      |
| 8    | Mechanism                                                                                         | S17      |
| 9    | References                                                                                        | S18-S19  |
| 10   | Scanned copies of spectra                                                                         | S20-S102 |

## Materials and methods:

### 1. Materials:

All reactions were carried out in oven-dried glassware under an argon atmosphere employing standard techniques in handling air-sensitive materials. Substituted ester was prepared from substituted acid, ethanolamine was purchased from SRL, chiral alcohols ((*S*)-(-)-2-Amino-3-phenyl-1-propanol (190438), (*S*)-2-Amino-1-phenylethanol (494577) and (*R*)-(-)-2-Phenylglycinol (A19030) were purchased from Aldrich and Alfa Aesar. Potassium carbonate was purchased from Merck. Flash chromatography was performed on silica gel 100-200 mesh (code 95178), 200-400 (code 96671) mesh size was purchased from SRL. Sodium chloride was purchased from SRL (Assay =99.5%). <sup>1</sup>H NMR was recorded Brucker model avance-II 300 MHz and <sup>13</sup>C 75 MHz spectrometer using TMS as an internal standard and CDCl<sub>3</sub>, DMSO-d<sub>6</sub> as a solvent. The JEOL GCMATE II GC-MS with Data system is a high resolution, Electron Spray Ionization (ESI) methods were used for analyzing mass of molecules. Melting points were recorded on an digital melting point apparatus and are uncorrected. Optical rotations were measured on a PerkinElmer Precisely/Model-341 polarimeter operating at the sodium D line with a 100 mm path cell. FT-IR spectrum was taken Perkin Elmer Spectrum RX I model.

## Methods:

### General Procedure

#### 2. Synthesis of 4-nitrophenyl cinnamate

The synthesis of 4-nitrophenyl cinnamate procedure was performed by closely following the Literature procedure.<sup>1a</sup>

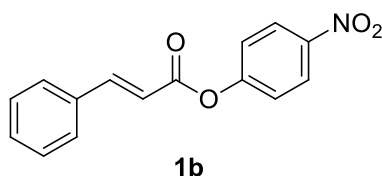

To the mixture of cinnamic acid (0.15 g, 1 mmol) and 4-nitrophenol (0.14 g, 1 mmol) in dichloromethane, DCC (0.248 g, 1.2 mmol) and DMAP (0.013 g, 0.1 mmol) was added. Then, the reaction was heated at 50 °C for 3 h. After complete consumption of starting material, the reaction mixture was cooled to room temperature and dissolved with DCM and filtered. The filtrate was concentrated under reduced pressure and obtained crude was purified by column chromatography on silica gel (100-200 mesh) in 10% Ethyl acetate in pet ether to afford 0.215 g of white solid, Yield- 80%. M.p: 141-142 °C, Lit (145-146 °C)<sup>1b</sup>.

#### 2a. Synthesis of 1,3-Didodecyl Benzimidazolium Bromide (NHC-D)

The synthesis of 1,3-Didodecyl Benzimidazolium Bromide was performed by following the Literature procedure.<sup>2</sup> <sup>1</sup>H NMR (CDCl<sub>3</sub>): δ = 11.41 (s, 1H) , 7.74-7.65 (m, 4H), 4.64 (t, *J* = 7.5 Hz, 1H), 2.10- 2.00 (m, 4H), 1.42- 1.24 (m, 36H), 0.87 (t, *J* = 6.9 Hz, 6H). Spectra data compared with Literature.<sup>2</sup>

### 3. Synthesis of 3-Amino-3-phenylpropan-1-ol

The preparation was carried out with slightly modified literature procedure.<sup>3</sup>

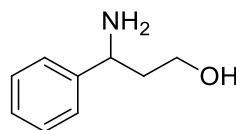

**Step 1:** NH<sub>4</sub>OAc was added in a solution of malonic acid (2.0 mmol) and Benzaldehyde (2.0 mmol) in EtOH (10 ml). The mixture was reflux for overnight. The reaction mixture was cooled to room temperature. The resulting precipitate was collected by filtration and washed with ice-cold EtOH. The white solid was dried in vacuo, to give 3-amino-3-phenylpropionic acid. The afford product was taken to next step without further purification.

**Step 2:** The acid (2 mmol) was dissolved in THF (20 mL) and cooled to 0 °C. To this mixture was added portionwise LiAlH<sub>4</sub> (6 mmol) and the mixture was stirred for 15 mins at same temperature. The reaction mixture was refluxed for 2 h. After Complete consumption of starting material by TLC analysis. The reaction mixture was cooled to 0 °C and slowly quenched with water. The grey mixture was extracted with ethyl acetate (3 × 20 mL) and the combined organic layer was dried over Na<sub>2</sub>SO<sub>4</sub> and concentrated under reduced pressure to afford crude product. The crude product was washed with n-hexane and triturate to afford white solid. Yield: 66%. Mp: 71-73 °C, (Lit: 76-77 °C)<sup>3</sup>. <sup>1</sup>H NMR (CDCl<sub>3</sub>): δ = 7.39-7.23 (m, 5H), 4.15-4.11 (m, 1H), 3.86-3.78 (m, 2H), 2.62 (br s, 3H), 1.94-1.85 (m, 2H).

#### 4. Synthesis of symmetrically substituted analogues of syncarpamide derivatives using NHC organocatalysis:

A 10 mL reaction vial was charged with amino alcohol derivatives (0.2 mmol), Substituted esters (0.2 mmol) and water (2 mL). To this mixture, potassium carbonate (0.042 g, 0.3 mmol) and NHC-D (0.09 g, 0.02 mmol) were added; the reaction vial was closed with rubber septa and purged with argon. After purging for 5 minutes, the reaction vial was tightly sealed with crimper cap and allowed to stir for 12 h at room temperature. (For **3h-n**, the reaction mixture needs to be heated to 60 °C for 5 h). After completion, the reaction mixture was extracted with ethyl acetate (3×10 mL). The combined organic layer was dried over anhydrous Na<sub>2</sub>SO<sub>4</sub> and concentrated under reduced pressure. The afforded crude mixture was purified by flash chromatography on silica gel (200-400 mesh) in 50-100% ethyl acetate in hexanes to afford the product.

**2-[(2E)-3-phenylprop-2-enamido]ethyl (2E)-3-phenylprop-2-enoate (3a).** White solid, Yield: 26.4 mg (82%), Mp: 93-95 °C (Lit 94–97 °C)<sup>4</sup>, <sup>1</sup>H NMR (300 MHz, CDCl<sub>3</sub>) δ 7.74 (d, *J* = 15.9 Hz, 1H), 7.66 (d, *J* = 15.6 Hz, 1H), 7.56-7.50 (m, 4H), 7.42 – 7.35 (m, 6H), 6.47 (d, *J* = 14.4 Hz, 1H), 6.42 (d, *J* = 14.1 Hz, 1H), 6.06 (s, 1H), 4.40 (t, *J* = 5.1 Hz, 2H), 3.75 (q, *J* = 5.1 Hz, 2H). NMR details were compared with literature report<sup>4</sup>.

**2-[(2E)-3-(4-chlorophenyl)prop-2-enamido]ethyl(2E)-3-(4-chlorophenyl)prop-2-enoate (3b).** White solid, Yield: 29.9 mg (77%), Mp: 236-238 °C, <sup>1</sup>H NMR (300 MHz, CDCl<sub>3</sub>) δ 7.64 (dd, *J* = 22.1, 16.2 Hz, 2H), 7.48-7.33 (m, 8H), 6.41 (t, *J* = 16.2 Hz, 2H), 6.02 (s, 1H), 4.39 (t, *J* = 5.1 Hz, 2H), 3.77- 3.74 (m, 2H). <sup>13</sup>C NMR (75 MHz, CDCl<sub>3</sub>, DMSO-d<sub>6</sub>) δ 166.2, 165.6, 143.3,

138.6, 135.8, 134.7, 133.2, 132.3, 128.9, 128.8, 128.6, 128.5, 121.4, 117.9, 62.9, 38.3. HRMS calcd for  $C_{20}H_{17}Cl_2NO_3Na$   $[M+Na]^+$ : 412.0483, found: 412.0483.

**2-[(2E)-3-(4-fluorophenyl)prop-2-enamido]ethyl (2E)-3-(4-fluorophenyl)prop-2-enoate (3c).**

White solid, Yield: 30 mg (84%), Mp: 157-161 °C,  $^1H$  NMR (300 MHz,  $CDCl_3$ )  $\delta$  7.69 (d,  $J$  = 16.2 Hz, 1H), 7.62 (d,  $J$  = 15.6 Hz, 1H), 7.55- 7.47 (m, 4H), 7.08 (q,  $J$  = 9 Hz, 4H), 6.36 (t,  $J$  = 16.5 Hz, 2H), 6.01 (s, 1H), 4.39 (t,  $J$  = 5.1 Hz, 2H), 3.75 (q,  $J$  = 5.4 Hz, 2H).  $^{13}C$  NMR (75 MHz,  $CDCl_3$ )  $\delta$  167.1, 165.9, 165.7, 165.3, 144.4, 140.3, 130.9, 130.4, 130.1, 130.0, 129.7, 129.6, 120.0, 117.1, 116.3, 116.1, 116.0, 115.8, 63.4, 39.3. HRMS calcd for  $C_{20}H_{18}F_2NO_3$   $[M+H]^+$ : 358.1255, found: 358.1254.

**2-[(2E)-3-(3-nitrophenyl)prop-2-enamido]ethyl (2E)-3-(3-nitrophenyl)prop-2-enoate (3d).**

White solid, Yield: 35.8 mg (88%), Mp: 115-116 °C,  $^1H$  NMR (300 MHz,  $DMSO-d_6$ )  $\delta$  8.57 (s, 1H), 8.41 (br s, 2H), 8.24 (q,  $J$  = 7.2 Hz, 3H), 8.04 (d,  $J$  = 7.5 Hz, 1H), 7.86 (d,  $J$  = 15.9 Hz, 1H), 7.75- 7.69 (m, 2H), 7.60 (d,  $J$  = 15.9 Hz, 1H), 6.91 (d,  $J$  = 10.2 Hz, 1H), 6.85 (d,  $J$  = 10.2 Hz, 1H), 4.28 (t,  $J$  = 5.1 Hz, 2H), 3.55 (d,  $J$  = 5.4 Hz, 2H).  $^{13}C$  NMR (75 MHz,  $CDCl_3$ ,  $DMSO-d_6$ )  $\delta$  164.5, 164.1, 147.2, 141.0, 135.72, 135.67, 134.7, 132.7, 129.0, 128.8, 123.4, 123.3, 122.3, 121.2, 120.2, 119.7, 62.0, 37.1. HRMS calcd for  $C_{20}H_{18}N_3O_7$   $[M+H]^+$ : 412.1145, found: 412.1144.

**2-[(2E)-3-(4-cyanophenyl)prop-2-enamido]ethyl (2E)-3-(4-cyanophenyl)prop-2-enoate (3e).**

White solid, Yield: 27.2 mg (73%), Mp: 216-218 °C,  $^1H$  NMR (300 MHz,  $CDCl_3$ )  $\delta$  7.74 – 7.57 (m, 10H), 6.51 (t,  $J$  = 15.9 Hz, 2H), 6.08 (s, 1H), 4.42 (d,  $J$  = 4.2 Hz, 2H), 3.77 (d,  $J$  = 4.8 Hz, 2H).  $^{13}C$  NMR (75 MHz,  $CDCl_3$ ,  $DMSO-d_6$ )  $\delta$  164.9, 164.5, 141.8, 138.7, 137.6, 136.8, 131.7,

131.6, 127.6, 127.2, 124.1, 120.4, 117.6, 117.4, 112.2, 111.3, 62.3, 37.5. HRMS calcd for  $C_{22}H_{18}N_3O_3$   $[M+H]^+$ : 372.1348, found: 372.1349.

**[Ethane 2-[(3-nitrophenyl)formamido]ethyl 3-nitrobenzoate (3f).** White solid, Yield: 47.3 mg (65%), Mp: 144-145 °C, (Lit 152–153°C)<sup>5</sup>,  $^1H$  NMR (300 MHz,  $CDCl_3$ )  $\delta$  8.88 (t,  $J$  = 1.8 Hz, 1H), 8.62 (t,  $J$  = 1.8 Hz, 1H), 8.46 – 8.36 (m, 3H), 8.19-8.16 (m, 1H), 7.72-7.65 (m, 2H), 6.85 (s, 1H), 4.66 (t,  $J$  = 5.1 Hz, 2H), 3.95 (q,  $J$  = 5.1 Hz, 2H). NMR details were compared with literature report<sup>5</sup>.

**N-(2-hydroxyethyl)benzamide (3g).** Colorless gum, Yield: 28.4 mg (85%),  $^1H$  NMR (300 MHz,  $CDCl_3$ )  $\delta$  7.79 (d,  $J$  = 7.2 Hz, 2H), 7.54 – 7.42 (m, 3H), 6.64 (s, 1H), 3.86 (t,  $J$  = 4.8 Hz, 2H), 3.65 (q,  $J$  = 5.4 Hz, 2H). NMR details were compared with literature report<sup>6</sup>.

**(2R)-2-phenyl-2-[(2E)-3-phenylprop-2-enamido]ethyl(2E)-3-phenylprop-2-enoate(3h).**

White solid, Yield: 26.8 mg (69%), Mp: 131-132 °C,  $^1H$  NMR (300 MHz,  $CDCl_3$ )  $\delta$  7.70 (d,  $J$  = 16.2 Hz, 1H), 7.64 (d,  $J$  = 15.6 Hz, 1H), 7.53-7.48 (m, 4H), 7.40 – 7.29 (m, 11H), 6.45 (dd,  $J$  = 15.6, 8.4 Hz, 3H), 5.54-5.48 (m, 1H), 4.68 (dd,  $J$  = 11.6, 7.6 Hz, 1H), 4.45 (dd,  $J$  = 11.6, 4.5 Hz, 1H).  $^{13}C$  NMR (75 MHz,  $CDCl_3$ )  $\delta$  167.4, 165.5, 146.0, 141.8, 138.4, 134.7, 134.1, 130.6, 129.8, 128.93, 128.88, 128.8, 128.2, 128.0, 127.9, 126.8, 120.3, 117.2, 66.2, 53.2. HRMS calcd for  $C_{20}H_{18}F_2NO_3$   $[M+H]^+$ : 398.1756, found: 398.1757.

**(2R)-2-[(2E)-3-(4-methoxyphenyl)prop-2-enamido]-2-phenylethyl(2E)-3-(4-**

**methoxyphenyl)prop-2-enoate (3i).** White solid, Yield: 34.1 mg (74%), Mp: 194-197 °C,  $^1H$  NMR (300 MHz,  $CDCl_3$ )  $\delta$  7.65 (d,  $J$  = 15.9 Hz, 1H), 7.58 (d,  $J$  = 15.3 Hz, 1H) 7.48 – 7.30 (m, 9H), 6.89 (dd,  $J$  = 8.7, 5.1 Hz, 4H), 6.38 (d,  $J$  = 7.8 Hz, 1H), 6.34 (d,  $J$  = 8.7 Hz, 1H), 6.29 (d,  $J$  = 9.0 Hz, 1H), 5.52 - 5.46 (m, 1H), 4.66 (dd,  $J$  = 11.7, 7.8 Hz, 1H), 4.42 (dd,  $J$  = 11.7, 4.5 Hz,

1H), 3.83 (d,  $J = 3.6$  Hz, 6H).  $^{13}\text{C}$  NMR (75 MHz,  $\text{CDCl}_3$ )  $\delta$  167.8, 165.8, 161.6, 161.0, 145.6, 141.4, 138.6, 130.0, 129.5, 128.8, 127.9, 127.4, 126.9, 126.8, 117.9, 114.7, 114.4, 114.2, 66.1, 55.4, 53.2. HRMS calcd for  $\text{C}_{28}\text{H}_{28}\text{NO}_5$   $[\text{M}+\text{H}]^+$ : 458.1967, found: 458.1968.

**(2R)-2-[(2E)-3-(4-fluorophenyl)prop-2-enamido]-2-phenylethyl(2E)-3-(4-fluorophenyl)prop-2-enoate (3j).** White solid, Yield: 23.7 mg (55%), Mp: 138-142 °C,  $^1\text{H}$  NMR (300 MHz,  $\text{CDCl}_3$ )  $\delta$  7.81-7.59 (m, 4H), 7.54 – 7.27 (m, 11H), 7.06 (q,  $J = 7.8$  Hz, 4H), 6.56 (d,  $J = 15.9$  Hz, 1H), 6.35 (d,  $J = 16.2$  Hz, 1H), 5.50 (q,  $J = 5.7$  Hz, 1H), 4.58 – 4.43 (m, 2H).  $^{13}\text{C}$  NMR (75 MHz,  $\text{CDCl}_3$ )  $\delta$  167.3, 165.3, 144.6, 140.6, 138.3, 130.9, 130.4, 130.3, 130.2, 130.1, 129.7, 129.6, 128.9, 128.1, 126.8, 120.0, 117.0, 116.3, 116.1, 116.0, 115.8, 66.2, 53.2. HRMS calcd for  $\text{C}_{26}\text{H}_{22}\text{F}_2\text{NO}_3$   $[\text{M}+\text{H}]^+$ : 434.1568, found: 434.1569.

**(2R)-2-[(2E)-3-(4-chlorophenyl)prop-2-enamido]-2-phenylethyl(2E)-3-(4-chlorophenyl)prop-2-enoate (3k).** White solid, Yield: 36.7 mg (79%), Mp: 120-123 °C,  $^1\text{H}$  NMR (300 MHz,  $\text{CDCl}_3$ )  $\delta$  7.60 (t,  $J = 16.8$ , 2H), 7.45 – 7.31 (m, 13H), 6.40 (q,  $J = 9$  Hz, 3H), 5.53-5.47 (m, 1H), 4.68 (dd,  $J = 11.7$ , 8.1 Hz, 1H), 4.44 (dd,  $J = 11.7$ , 4.5 Hz, 1H).  $^{13}\text{C}$  NMR (75 MHz,  $\text{CDCl}_3$ )  $\delta$  167.1, 165.2, 144.5, 140.5, 138.2, 136.6, 135.7, 133.2, 132.6, 129.4, 129.2, 129.1, 129.0, 128.9, 128.1, 126.8, 120.7, 117.8, 66.3, 53.2. HRMS calcd for  $\text{C}_{26}\text{H}_{21}\text{Cl}_2\text{NO}_3\text{Na}$   $[\text{M}+\text{Na}]^+$ : 488.0796, found: 488.0786. IR (KBr)  $\nu$  3342, 1712, 1630, 1533, 1490, 1311, 1160, 1086, 973, 822, 700, 468  $\text{cm}^{-1}$ .

**(2S)-3-phenyl-2-[(2E)-3-phenylprop-2-enamido]propyl (2E)-3-phenylprop-2-enoate (3l).** White solid, Yield: 33.8 mg (82%), Mp 164-166 °C,  $^1\text{H}$  NMR (300 MHz,  $\text{CDCl}_3$ )  $\delta$  7.72 (d,  $J = 15.9$  Hz, 1H), 7.63 (d,  $J = 15.6$  Hz, 1H), 7.56 – 7.48 (m, 4H), 7.41-7.28 (m, 10H), 6.48 (d,  $J = 15.9$  Hz, 1H), 6.38 (d,  $J = 15.6$  Hz, 1H), 5.93 (d,  $J = 8.1$  Hz, 1H), 4.70-4.59 (m, 1H), 4.33-4.22

(m, 2H), 3.07 (dd,  $J = 13.5, 5.7$  Hz, 1H), 2.93 (dd,  $J = 13.8, 8.1$  Hz, 1H).  $^{13}\text{C}$  NMR (75 MHz,  $\text{CDCl}_3$ )  $\delta$  167.2, 165.5, 145.8, 141.5, 137.0, 134.7, 134.2, 130.6, 129.8, 129.4, 129.0, 128.8, 128.7, 128.2, 127.9, 126.9, 120.4, 117.3, 64.8, 50.1, 37.6. HRMS calcd for  $\text{C}_{27}\text{H}_{26}\text{NO}_3$   $[\text{M}+\text{H}]^+$ : 412.1913, found: 412.1913.

**(2S)-2-[(2E)-3-(4-bromophenyl)prop-2-enamido]-3-phenylpropyl(2E)-3-(4-**

**bromophenyl)prop-2-enoate (3m).** White solid, Yield: 32.3 mg (57%), Mp 101-103 °C.  $^1\text{H}$  NMR (300 MHz,  $\text{CDCl}_3$ )  $\delta$  7.68 – 7.64 (m, 3H), 7.60 – 7.43 (m, 5H), 7.40 – 7.20 (m, 7H), 6.46 (d,  $J = 15.9$  Hz, 1H), 6.36 (d,  $J = 15.6$  Hz, 1H), 5.99 (d,  $J = 8.1$  Hz, 1H), 4.65 (d,  $J = 4.5$  Hz, 1H), 4.33 – 4.22 (m, 2H), 3.05 (dd,  $J = 13.5, 6.0$  Hz, 1H), 2.92 (dd,  $J = 13.5, 8.1$  Hz, 1H).  $^{13}\text{C}$  NMR (75 MHz,  $\text{CDCl}_3$ )  $\delta$  166.7, 165.0, 144.1, 140.0, 136.8, 136.2, 133.4, 132.6, 130.8, 130.5, 130.4, 130.3, 129.3, 128.8, 126.93, 126.87, 126.8, 123.1, 123.0, 121.8, 118.8, 65.0, 50.1, 37.6. HRMS calcd for  $\text{C}_{27}\text{H}_{24}\text{Br}_2\text{NO}_3$   $[\text{M}+\text{H}]^+$ : 568.0123, found: 568.0011. IR (KBr)  $\nu$  3273, 2921, 2851, 1710, 1626, 1555, 1175, 972, 783, 667, 443  $\text{cm}^{-1}$ .

**(2S)-2-[(2E)-3-(4-fluorophenyl)prop-2-enamido]-3-phenylpropyl(2E)-3-(4-**

**fluorophenyl)prop-2-enoate (3n).** White solid, Yield: 38.7 mg (86%), Mp: 104-106 °C,  $^1\text{H}$  NMR (300 MHz,  $\text{CDCl}_3$ )  $\delta$  7.67 (d,  $J = 15.9$  Hz, 1H), 7.59 (d,  $J = 15.9$  Hz, 1H), 7.55-7.45 (m, 4H), 7.35 – 7.25 (m, 5H), 7.12- 7.02 (m, 4H), 6.39 (d,  $J = 15.9$  Hz, 1H), 6.29 (d,  $J = 15.6$  Hz, 1H), 5.93 (d,  $J = 8.4$  Hz, 1H), 4.64 (d,  $J = 4.5$  Hz, 1H), 4.33-4.21 (m, 2H), 3.05 (dd,  $J = 13.8, 5.7$  Hz, 1H), 2.92 (dd,  $J = 13.8, 8.1$  Hz, 1H).  $^{13}\text{C}$  NMR (75 MHz,  $\text{CDCl}_3$ )  $\delta$  167.1, 165.7, 165.4, 162.4, 161.9, 144.5, 140.3, 136.9, 130.94, 130.90, 130.42, 130.37, 130.2, 130.1, 129.7, 129.6, 129.3, 128.7, 126.9, 120.1, 117.0, 116.3, 116.1, 116.0, 115.8, 64.8, 50.1, 37.6. HRMS calcd for  $\text{C}_{27}\text{H}_{24}\text{F}_2\text{NO}_3$   $[\text{M}+\text{H}]^+$ : 448.1724, found: 448.1725. IR (KBr)  $\nu$  3272, 1710, 1628, 1509, 1318, 1279, 1232, 972, 827, 700, 452  $\text{cm}^{-1}$ .

**(1R)-1-phenyl-2-[(2E)-3-phenylprop-2-enamido]ethyl(2E)-3-phenylprop-2-enoate (3o).**

White solid, Yield: 31 mg (72%), Mp: 178-180 °C, (Lit 181-183)<sup>7</sup>,  $[\alpha]_{\text{D}}^{31}$  - 69.0 (c 0.07, CHCl<sub>3</sub>), (Lit:  $[\alpha]_{\text{D}}^{28}$  - 57.3 (c 0.5, CHCl<sub>3</sub>))<sup>7</sup>, <sup>1</sup>H NMR (300 MHz, CDCl<sub>3</sub>)  $\delta$  7.74 (d, *J* = 15.9 Hz, 1H), 7.63 (d, *J* = 15.6 Hz, 1H), 7.55 – 7.34 (m, 15H), 6.52 (d, *J* = 15.9 Hz, 1H), 6.38 (d, *J* = 15.6 Hz, 1H), 6.06 (dd, *J* = 8.4, 4.0 Hz, 1H), 5.96 (br s, 1H), 3.98 – 3.78 (m, 2H). NMR details were compared with literature report<sup>7</sup>.

**(1R)-1-phenyl-2-[(2E)-3-(thiophen-2-yl)prop-2-enamido]ethyl(2E)-3-(thiophen-2-yl)prop-2-enoate (3p).** White solid, Yield: 33.6 mg (82%), Mp: 164-166 °C, <sup>1</sup>H NMR (300 MHz, CDCl<sub>3</sub>)  $\delta$  7.83 (d, *J* = 15.6 Hz, 1H), 7.75 (d, *J* = 15 Hz, 1H), 7.44-7.28 (m, 8H), 7.21 (d, *J* = 3.3 Hz, 1H), 7.08 - 7.01 (m, 2H), 6.31 (d, *J* = 15.6 Hz, 1H), 6.17 (d, *J* = 15 Hz, 1H), 6.02 (dd, *J* = 8.7 Hz, 4.2 Hz, 1H), 5.86 (br s, 1H), 3.96 – 3.88 (m, 1H), 3.82 – 3.73 (m, 1H). <sup>13</sup>C NMR (75 MHz, CDCl<sub>3</sub>)  $\delta$  166.3, 165.7, 139.9, 139.4, 138.3, 137.7, 134.3, 131.5, 130.5, 128.9, 128.8, 128.6, 128.2, 128.0, 127.5, 126.5, 119.1, 116.2, 74.8, 44.8. HRMS calcd for C<sub>22</sub>H<sub>20</sub>NO<sub>3</sub>S<sub>2</sub> [M+H]<sup>+</sup>: 410.0885, found:410.0903. IR (KBr)  $\nu$  3320, 2920, 1705, 1619, 1546, 1204, 1165, 1103, 1041, 833, 698, 458 cm<sup>-1</sup>.

**(2R)-2-phenyl-2-[(2E)-3-(thiophen-2-yl)prop-2-enamido]ethyl(2E)-3-(thiophen-2-yl)prop-2-enoate (3q).** White solid, Yield: 29.1 mg (71%), Mp: 138-140 °C, <sup>1</sup>H NMR (300 MHz, CDCl<sub>3</sub>)  $\delta$  7.80 (d, *J* = 13.8 Hz, 1H), 7.74 (d, *J* = 13.5 Hz, 1H), 7.40-7.31 (m, 8H), 7.20 (d, *J* = 3.3 Hz, 1H), 7.07- 7.01 (m, 2H), 6.34 (d, *J* = 7.8 Hz, 1H), 6.27 (d, *J* = 11.7 Hz, 1H), 6.21 (d, *J* = 12.3 Hz, 1H), 5.51- 5.45 (m, 1H), 4.64 (dd, *J* = 11.4, 7.2 Hz, 1H), 4.42 (dd, *J* = 11.7, 4.5 Hz, 1H). <sup>13</sup>C NMR (75 MHz, CDCl<sub>3</sub>)  $\delta$  167.2, 165.2, 139.9, 139.3, 138.4, 138.3, 134.5, 131.4, 130.5, 128.93,

128.86, 128.2, 128.0, 127.5, 126.8, 119.1, 115.9, 66.2, 53.1. HRMS calcd for C<sub>22</sub>H<sub>20</sub>NO<sub>3</sub>S<sub>2</sub> [M+H]<sup>+</sup>: 410.0885, found: 410.0902.

**(2S)-2-[(2E)-3-(furan-2-yl)prop-2-enamido]-3-phenylpropyl(2E)-3-(furan-2-yl)prop-**

**2enoate(3r).** White solid, Yield: 22.8 mg (58%), Mp: 122-124 °C, <sup>1</sup>H NMR (300 MHz, CDCl<sub>3</sub>) δ 7.51 – 7.42 (m, 4H), 7.37 – 7.23 (m, 4H), 6.65 (d, *J* = 3.6 Hz, 1H), 6.55 (d, *J* = 3.3 Hz, 1H), 6.50 – 6.44 (m, 2H), 6.35 (d, *J* = 15.6 Hz, 1H), 6.27 (d, *J* = 15.3 Hz, 1H), 5.86 (d, *J* = 8.1 Hz, 1H), 4.66 – 4.55 (m, 1H), 4.28 – 4.17 (m, 2H), 3.03 (dd, *J* = 13.8, 5.7 Hz, 1H), 2.90 (dd, *J* = 13.5, 8.1 Hz, 1H). <sup>13</sup>C NMR (75 MHz, CDCl<sub>3</sub>) δ 167.2, 165.4, 151.2, 150.8, 145.0, 144.1, 137.0, 131.9, 129.4, 128.7, 128.3, 126.8, 118.1, 115.4, 114.9, 114.0, 112.4, 112.2, 64.6, 50.0, 37.6. HRMS calcd for C<sub>23</sub>H<sub>22</sub>NO<sub>5</sub> [M+H]<sup>+</sup>: 392.1498, found: 392.1516. IR (KBr) ν 3376, 2926, 1716, 1634, 1535, 1262, 1166, 1020, 749, 701 cm<sup>-1</sup>.

**2-[(2E)-3-(furan-2-yl)prop-2-enamido]ethyl(2E)-3-(furan-2-yl)prop-2-enoate(3s)<sup>8</sup>.** off-

White solid, Yield: 18.7 mg (62%), Mp: 94-97 °C, (Lit 100-101 °C)<sup>8</sup>. <sup>1</sup>H NMR (300 MHz, CDCl<sub>3</sub>) δ 7.50- 7.39 (m, 4H), 6.65 (d, *J* = 3.6 Hz, 1H), 6.56 (d, *J* = 3.6 Hz, 1H), 6.49- 6.44 (m, 2H), 6.35 (d, *J* = 5.1 Hz, 1H), 6.30 (d, *J* = 4.8 Hz, 1H), 5.99 (br s, 1H), 4.35 (t, *J* = 5.1 Hz, 2H), 3.74-3.69 (m, 2H).

**3-phenyl-3-[(2E)-3-phenylprop-2-enamido]propyl(2E)-3-phenylprop-2enoate(3v).** White

solid, Yield: 27.7 mg (66%), Mp: 176-179 °C, <sup>1</sup>H NMR (300 MHz, CDCl<sub>3</sub>) δ 7.67 (d, *J* = 4.8 Hz, 1H), 7.62 (d, *J* = 4.5 Hz, 1H), 7.52 - 7.45 (m, 4H), 7.39-7.28 (m, 11H), 6.42 (d, *J* = 16.2 Hz, 2H), 6.11 (d, *J* = 8.1 Hz, 1H), 5.34 (q, *J* = 7.2 Hz, 1H), 4.27 (t, *J* = 6.3 Hz, 2H), 2.42-2.22 (m, 2H). <sup>13</sup>C NMR (75 MHz, CDCl<sub>3</sub>) δ 166.9, 165.2, 145.1, 141.6, 141.2, 134.7, 134.3, 130.4, 129.8, 128.93, 128.91, 128.8, 128.2, 127.82, 127.8, 126.6, 120.5, 117.8, 61.7, 51.3, 34.9. HRMS calcd

for  $C_{27}H_{26}NO_3$   $[M+H]^+$ : 412.1913, found: 412.1929. IR (KBr)  $\nu$  3273, 3054, 2940, 1711, 1617, 1544, 1316, 1172, 982, 767, 707, 464  $cm^{-1}$ .

**3-[(2E)-3-(4-bromophenyl)prop-2-enamido]-3-phenylpropyl(2E)-3-(4-bromophenyl)prop-2-enoate(3w).** White solid, Yield: 44 mg (74%), Mp: 168-172 °C,  $^1H$  NMR (300 MHz,  $CDCl_3$ )  $\delta$  7.61-7.59 (m, 1H), 7.59 – 7.46 (m, 5H), 7.40 - 7.28 (m, 9H), 6.41 (d,  $J$  = 3.0 Hz, 1H), 6.36 (d,  $J$  = 2.4 Hz, 1H), 6.03 (d,  $J$  = 8.1 Hz, 1H), 5.36-5.29 (m, 1H), 4.27 (t,  $J$  = 5.4 Hz, 2H), 2.39-2.18 (m, 2H).  $^{13}C$  NMR (75 MHz,  $CDCl_3$ )  $\delta$  166.6, 164.8, 143.7, 141.0, 140.3, 133.6, 133.2, 132.2, 132.1, 129.5, 129.2, 129.0, 127.9, 126.6, 124.7, 124.0, 121.0, 118.5, 61.8, 51.2, 34.8. HRMS calcd for  $C_{27}H_{24}Br_2NO_3$   $[M+H]^+$ : 568.0123, found: 568.0141.

**2-[methyl(2-[(2E)-3-phenylprop-2-enoyl]oxy)ethyl)amino]ethyl(2E)-3-phenylprop-2-enoate(3x).** Colorless oil, Yield: 20.5 mg (53%),  $^1H$  NMR (300 MHz,  $CDCl_3$ )  $\delta$  7.68 (d,  $J$  = 15.9 Hz, 2H), 7.51 – 7.48 (m, 4H), 7.37 – 7.34 (m, 6H), 6.47 (d,  $J$  = 15.9 Hz, 2H), 4.34 (t,  $J$  = 5.7 Hz, 4H), 2.84 (t,  $J$  = 5.7 Hz, 4H), 2.44 (s, 3H).  $^{13}C$  NMR (75 MHz,  $CDCl_3$ )  $\delta$  167.0, 145.1, 134.4, 130.3, 128.9, 128.1, 117.9, 62.2, 56.0, 43.1. HRMS calcd for  $C_{23}H_{26}NO_4$   $[M+H]^+$ : 380.1862, found: 380.1878.

**(2E)-3-phenyl-N-[2-{2-[2-(2E)-3-phenylprop-2-enamido]ethoxy}ethyl]prop-2-enamide(3y).**

Off-white solid, Yield: 16.6 mg (40%), M.P: 98 °C,  $^1H$  NMR (300 MHz,  $CDCl_3$ )  $\delta$  7.63 (d,  $J$  = 15.6 Hz, 2H), 7.50-7.47 (m, 4H), 7.37-7.32 (m, 6H), 6.47 (d,  $J$  = 15.6 Hz, 2H), 6.37 (s, 2H), 3.66-3.61 (m, 12H).  $^{13}C$  NMR (75 MHz,  $CDCl_3$ )  $\delta$  166.2, 141.1, 134.8, 129.7, 128.8, 127.8, 120.6, 70.3, 70.0, 39.5. HRMS calcd for  $C_{24}H_{29}N_2O_4$   $[M+H]^+$ : 409.2127, found: 409.2139.

## 5. Synthesis of Unsymmetrically substituted analogues of syncarpamide derivatives using NHC organocatalysis:

A 10 mL reaction vial was charged with amino alcohol derivatives (0.3 mmol), Methyl cinnamate (0.3 mmol) and water (2 mL). To this mixture, potassium carbonate (0.042 g, 0.3 mmol) were added; the reaction vial was closed with rubber septa and heated at 60 °C for 5 h. After 5 h, the substituted esters derivatives (0.2 mmol) and NHC-D (0.014 g, 0.03 mmol) were added. Then, the reaction vial was tightly sealed with crimper cap and allowed to stir for 12 h at room temperature. After completion of 12 h, the reaction mixture was extracted with ethyl acetate (3×10 mL). The combined organic layer was dried over anhydrous Na<sub>2</sub>SO<sub>4</sub> and concentrated under reduced pressure. The afforded crude mixture was purified by flash chromatography on silica gel (200-400 mesh) in 50-80% ethyl acetate in hexanes to afford the product.

**2-[(2E)-3-phenylprop-2-enamido] ethyl benzoate (4a).** White solid, Yield: 40.8 mg (45%), Mp: 105-109 °C (Lit 110–111°C)<sup>9</sup>, <sup>1</sup>H NMR (300 MHz, CDCl<sub>3</sub>) δ 7.80 (d, *J* = 7.2 Hz, 2H), 7.74 (d, *J* = 16.2 Hz, 1H), 7.54 – 7.39 (m, 8H), 6.68 (br s, 1H), 6.47 (d, *J* = 15.9 Hz, 1H), 4.46 (t, *J* = 5.1 Hz, 2H), 3.82 (q, *J* = 5.1 Hz, 2H). NMR details were compared with literature report<sup>9</sup>.

**2-[(2E)-3-(4-bromophenyl)prop-2-enamido]ethyl benzoate (4b).** White solid, Yield: 53.3 mg (47%), Mp: 138-140 °C, <sup>1</sup>H NMR (300 MHz, CDCl<sub>3</sub>) δ 7.79 (d, *J* = 6.9 Hz, 2H), 7.68 (s, 1H), 7.62 (s, 1H), 7.54- 7.43 (m, 5H), 7.30 – 7.25 (m, 2H), 6.61 (s, 1H), 6.46 (d, *J* = 15.9 Hz, 1H), 4.45 (t, *J* = 15.9 Hz, 2H), 3.82 (q, *J* = 4.8 Hz, 2H). <sup>13</sup>C NMR (75 MHz, CDCl<sub>3</sub>) δ 167.6, 167.1, 144.4, 134.2, 133.1, 132.2, 131.7, 129.6, 128.7, 127.0, 124.9, 118.0, 63.6, 39.8. HRMS calcd for C<sub>18</sub>H<sub>16</sub>BrNO<sub>3</sub>Na [M+Na]<sup>+</sup>: 396.0211, found: 396.0214.

**2-[(2E)-3-(3-nitrophenyl)prop-2-enamido]ethyl benzoate (4c).** White solid, Yield: 53.4 mg (52%), Mp: 110-130 °C, <sup>1</sup>H NMR (300 MHz, CDCl<sub>3</sub>) δ 8.39 (s, 1H), 8.25 (d, *J* = 8.1 Hz, 1H), 7.84- 7.74 (m, 4H), 7.62- 7.43 (m, 4H), 6.46 (d, *J* = 15.9 Hz, 1H), 4.48 (t, *J* = 5.1 Hz, 2H), 3.83 (q, *J* = 5.1 Hz, 2H). <sup>13</sup>C NMR (75 MHz, CDCl<sub>3</sub>) δ 167.7, 166.5, 148.7, 142.8, 135.9, 134.2, 133.8, 131.7, 130.1, 128.7, 127.0, 124.8, 122.5, 120.6, 63.8, 39.6. HRMS calcd for C<sub>18</sub>H<sub>17</sub>N<sub>2</sub>O<sub>5</sub> [M+H]<sup>+</sup>: 341.1137, found: 341.1138. IR (KBr) ν 3294, 3072, 2929, 1715, 1638, 1529, 1352, 1175, 994, 803, 697, 468 cm<sup>-1</sup>.

**(2R)-2-phenyl-2-[(2E)-3-phenylprop-2-enamido] ethyl benzoate (4d).** Off-white solid, Yield: 54 mg (40%), Mp: 170-173 °C, <sup>1</sup>H NMR (300 MHz, CDCl<sub>3</sub>) δ 7.83 (d, *J* = 7.5 Hz, 1H), 7.67 (d, *J* = 15.6 Hz, 1H), 7.52 – 7.47 (m, 3H), 7.45 – 7.29 (m, 11H), 6.48 (d, *J* = 15.9 Hz, 1H), 6.35 (d, *J* = 6.3 Hz, 1H), 5.30 – 5.19 (m, 1H), 4.04 – 3.93 (m, 2H). <sup>13</sup>C NMR (75 MHz, CDCl<sub>3</sub>) δ 166.4, 142.1, 138.8, 134.6, 129.9, 129.0, 128.9, 128.1, 127.9, 127.1, 126.8, 120.0, 66.9, 56.4. HRMS calcd for C<sub>24</sub>H<sub>22</sub>NO<sub>3</sub> [M+H]<sup>+</sup>: 372.1600, found: 372.1602.

## 6. NHC mediated transesterification reaction in aqueous medium:

A 10 mL reaction vial was charged with alcohol derivatives (0.2 mmol), substituted ester (0.2 mmol) and water (2 mL). To this mixture, potassium carbonate (0.042 g, 0.3 mmol) and NHC-D (0.013 g, 0.03 mmol) were added; the reaction vial was closed with rubber septa and purged with argon. After purging for 5 minutes, the reaction vial was tightly sealed with crimper cap and allowed to stir for 12 h at room temperature. After completion of 12 h, the reaction mixture was extracted with ethyl acetate (3×10 mL). The combined organic layer was dried over anhydrous Na<sub>2</sub>SO<sub>4</sub>, filtered and concentrated under reduced pressure. The afforded crude

mixture was purified by flash chromatography on silica gel (200-400 mesh) in 10% ethyl acetate in hexanes to afford the product.

**Methyl (2E)-3-phenylprop-2-enoate (5a).** Colorless gum, Yield: 29 mg (88%),  $^1\text{H}$  NMR (300 MHz,  $\text{CDCl}_3$ )  $\delta$  7.70 (d,  $J$  = 15.9 Hz, 1H), 7.55 – 7.50 (m, 2H), 7.40 – 7.36 (m, 3H), 6.45 (d,  $J$  = 15.9 Hz, 1H), 3.81 (s, 3H). NMR details were compared with literature report<sup>10</sup>.

**(2-Bromophenyl)methyl (2E)-3-phenylprop-2-enoate (5b).** Colorless gum, Yield: 56.3 mg (89%),  $^1\text{H}$  NMR (300 MHz,  $\text{CDCl}_3$ )  $\delta$  7.76 (d,  $J$  = 15.9 Hz, 1H), 7.60 (dd,  $J$  = 7.9, 1.0 Hz, 1H), 7.56– 7.51 (m, 2H), 7.47 (dd,  $J$  = 7.6, 1.5 Hz, 1H), 7.40 – 7.31 (m, 4H), 7.24– 7.18 (m, 1H), 6.52 (d,  $J$  = 16.2 Hz, 1H), 5.34 (s, 2H). NMR details were compared with literature report<sup>10</sup>.

**(2-Iodophenyl)methyl (2E)-3-phenylprop-2-enoate (5c).** Colorless gum, Yield: 61.8 mg (85%),  $^1\text{H}$  NMR (300 MHz,  $\text{CDCl}_3$ )  $\delta$  7.89 (dd,  $J$  = 7.9, 0.9 Hz, 1H), 7.77 (d,  $J$  = 15.9 Hz, 1H), 7.56 – 7.53 (m, 2H), 7.46 – 7.35 (m, 5H), 7.08– 7.02 (m, 1H), 6.52 (d,  $J$  = 16.2 Hz, 1H), 5.28 (s, 2H). NMR details were compared with literature report<sup>11</sup>.

**Octadecyl (2E)-3-phenylprop-2-enoate (5d).** Colorless gum, Yield: 57.3 mg (73%),  $^1\text{H}$  NMR (300 MHz,  $\text{CDCl}_3$ )  $\delta$  7.68 (d,  $J$  = 15.9 Hz, 1H), 7.55 – 7.52 (m, 2H), 7.39 – 7.36 (m, 3H), 6.45 (d,  $J$  = 15.9 Hz, 1H), 4.19 (t,  $J$  = 13.5 Hz, 6.9 Hz, 2H), 1.74–1.63 (m, 2H), 1.25 (s, 30H), 0.87 (t,  $J$  = 13.2 Hz, 6.9 Hz, 3H). NMR details were compared with literature report<sup>12</sup>.

**Naphthalen-2-yl (2E)-3-phenylprop-2-enoate (5e).** White solid, Yield: 38.3 mg (70%), Mp 106–109 °C (Lit 109–110 °C)<sup>13</sup>,  $^1\text{H}$  NMR (300 MHz,  $\text{CDCl}_3$ )  $\delta$  7.90 – 7.81 (m, 4H), 7.65 – 7.60 (m, 3H), 7.53 – 7.43 (m, 5H), 7.32 (dd,  $J$  = 8.9, 2.2 Hz, 1H), 6.69 (d,  $J$  = 16.2 Hz, 1H). NMR details were compared with literature report<sup>13</sup>.

**Phenyl (2E)-3-phenylprop-2-enoate (5f).** White solid, Yield: 36.8 mg (82%), Mp: 70-71 °C, (Lit 73 °C)<sup>13</sup>; <sup>1</sup>H NMR (300 MHz, CDCl<sub>3</sub>) δ 7.88 (d, *J* = 15.9 Hz, 1H), 7.61 – 7.56 (m, 2H), 7.45 – 7.38 (m, 5H), 7.28 – 7.23 (m, 1H), 7.19 – 7.16 (m, 2H), 6.64 (d, *J* = 15.9 Hz, 1H). NMR details were compared with literature report<sup>13</sup>.

## 7. Synthesis of transesterification of benzoin derivatives using NHC organocatalysis:

A 10 mL reaction vial was charged with benzoin derivatives (0.2 mmol), Substituted esters (0.2 mmol) and water (2 mL). To this mixture, potassium carbonate (0.069 g, 0.5 mmol) and NHC-D (0.022 g, 0.05 mmol) were added; the reaction vial was closed with rubber septa and purged with nitrogen. After purging for 5 minutes, the reaction vial was tightly sealed with crimper cap and allowed to stir for 3 h at 60 °C. After completion of 3 h, the reaction mixture was extracted with ethyl acetate (3×10 mL). The combined organic layer was dried over anhydrous Na<sub>2</sub>SO<sub>4</sub> and concentrated under reduced pressure. The afforded crude mixture was purified by flash chromatography on silica gel (200-400 mesh) in 10% ethyl acetate in hexanes to afford the product.

**1,2-Bis(phenyl)-2-oxoethyl (2E)-3-phenylprop-2-enoate (5g).** White solid, Yield: 50.2 mg (74%), Mp: 100-102 °C, (Lit 104-106 °C)<sup>14</sup>; <sup>1</sup>H NMR (300 MHz, CDCl<sub>3</sub>) δ 7.98 (d, *J* = 7.2 Hz, 2H), 7.80 (d, *J* = 15.9 Hz, 1H), 7.55 – 7.50 (m, 5H), 7.44 – 7.36 (m, 8H), 7.01 (s, 1H), 6.59 (d, *J* = 15.9 Hz, 1H). NMR details were compared with literature report<sup>14</sup>.

## 8. Mechanism

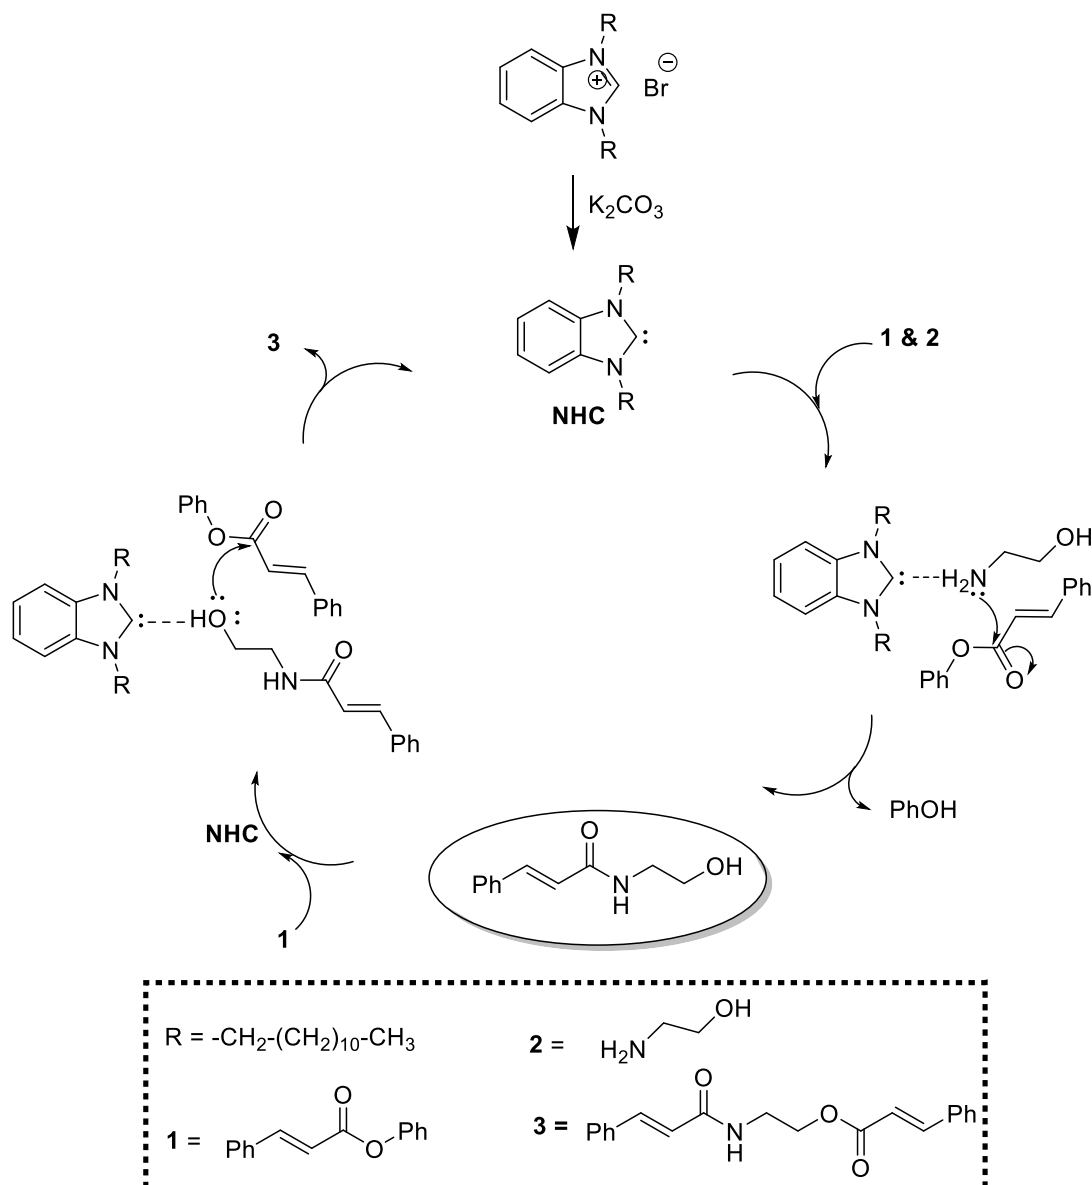

## 9. References

1. (a) B.M. Trost and K. Hirano, *Org. Lett.*, 2012, **14**, 2446–2449. (b) A Matviitsuk, M.D. Greenhalgh, D.J.B. Antfflnez, A. M. Z. Slawin, and A. D. Smith, *Angew. Chem*, 2017, **129**, 1-7.
2. L. Wang and E. Y.-X. Chen, *Green Chem.*, 2015, **17**, 5149-5153.
3. O. Torre, V. Gotor-Fernaández and V. Gotor, *Tetrahedron:Asymmetry*, 2006, **17**, 860-866.
4. H. Sato, and S. Hosokawa, *Synthesis*, 2018, **50**, 1343-1349.
5. H. Brintzinger and H. Koddebusch, *Chem. Ber.*, 1949, **82**, 201-203.
6. M. Movassaghi, and M. A. Schmidt, *Org. Lett.*, 2005, **7**, 2453–2456.
7. E. K. Aratikatla , T. R. Valkute , S. K. Puri , K. Srivastava, and A. K. Bhattacharya, *Eur J. Med. Chem.*, 2017, **138**, 1089-1105.
8. I. Castro, C. Diaz de Arce, J. Popelis, M.D. Gonzalez, E. Pastrana, E. Lukevics, *Latv. PSR Zinat. Akad. Vestis, Kim. Ser.*, 1989, **6**, 744-750.
9. W.R. Bowman, D.R. Coghlan, and H. Shah, *Comptes Rendus de l'Académie des Sciences - Series IIC – Chemistry*, 2001, **4**, 625-640.
10. A. B. Lutjen, M. A. Quirk, A. M. Barbera and E. M. Kolonko, *Bioorg. Med. Chem.*, 2018, **26**, 5291- 5298.
11. B. M. Jordan, Synthesis of benzoheterocycles using intramolecular cyclisation of aryl radicals, 1990, [URL: https://dspace.lboro.ac.uk/2134/14445](https://dspace.lboro.ac.uk/2134/14445), Page 163.
12. C.T. Chen, J.H. Kuo, C.H. Ku, S.S. Weng, and C.Y. Liu, *J. Org. Chem.*, 2005, **70**, 1328-1339.

13. V. Palermo, D. M. Ruiz, J. C. Autino, P. G. Vázquez, and G. P. Romanelli, *Pure Appl. Chem.*, 2012, **84**, 529–540.
14. Q. Zhao, B. Han, B. Wang, H.J. Leng, C. Peng, and W. Huang, *RSC Adv.*, 2015, **5**, 26972-26976.

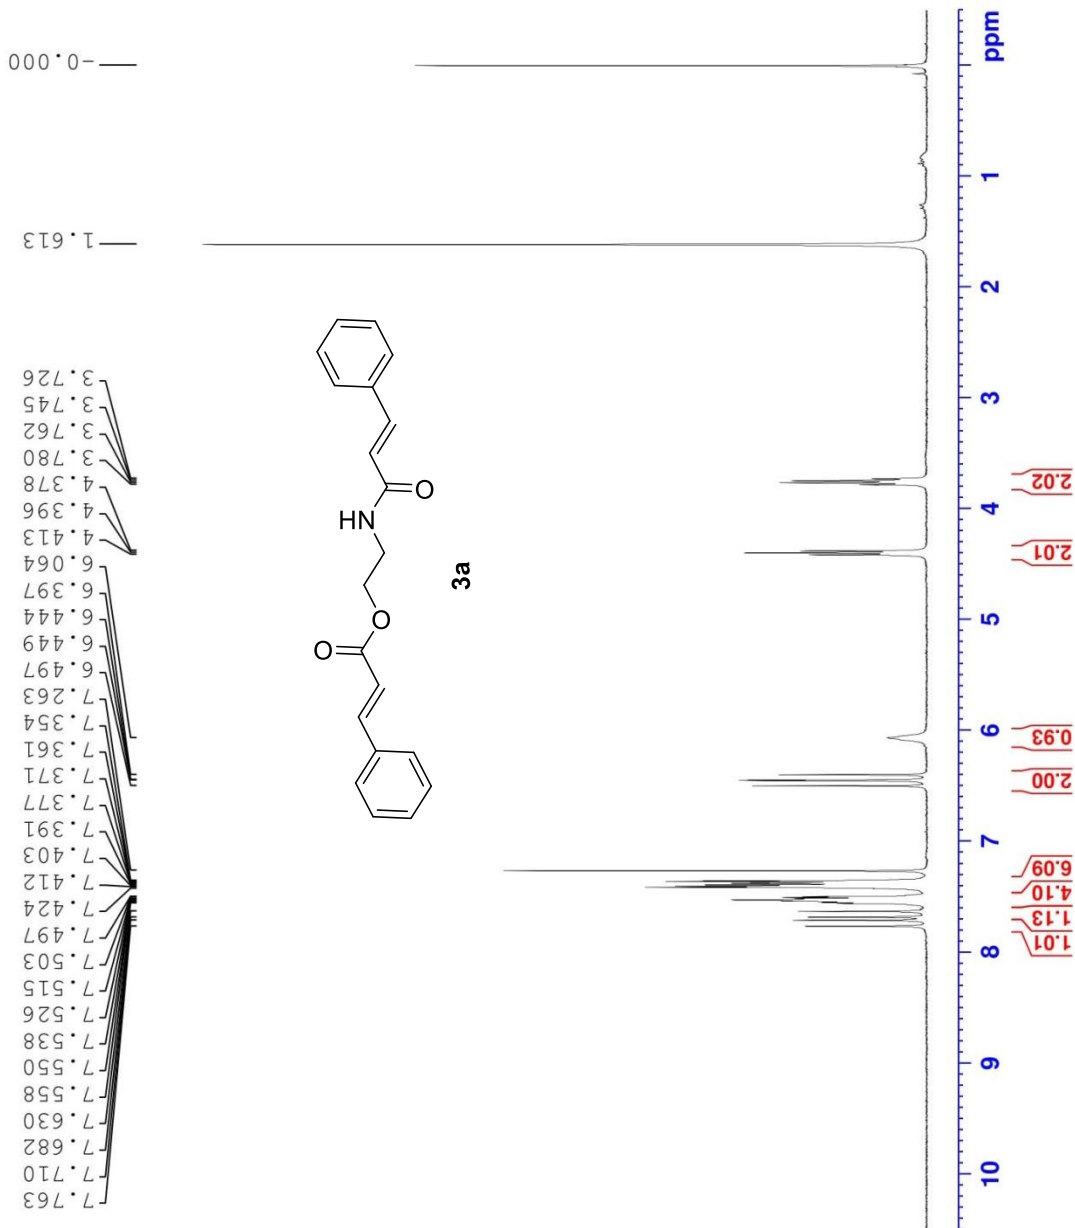

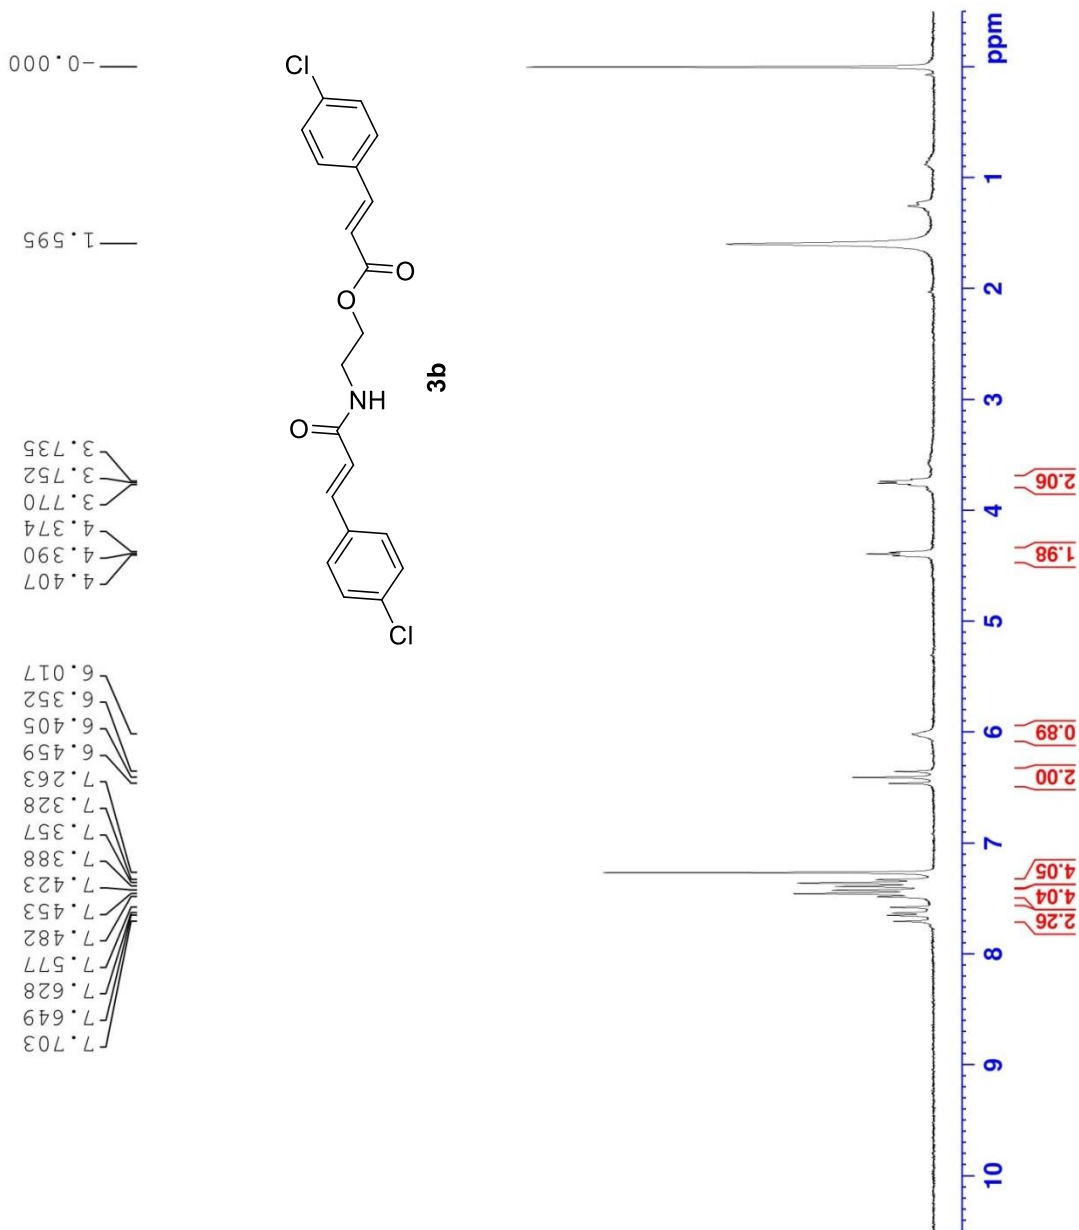

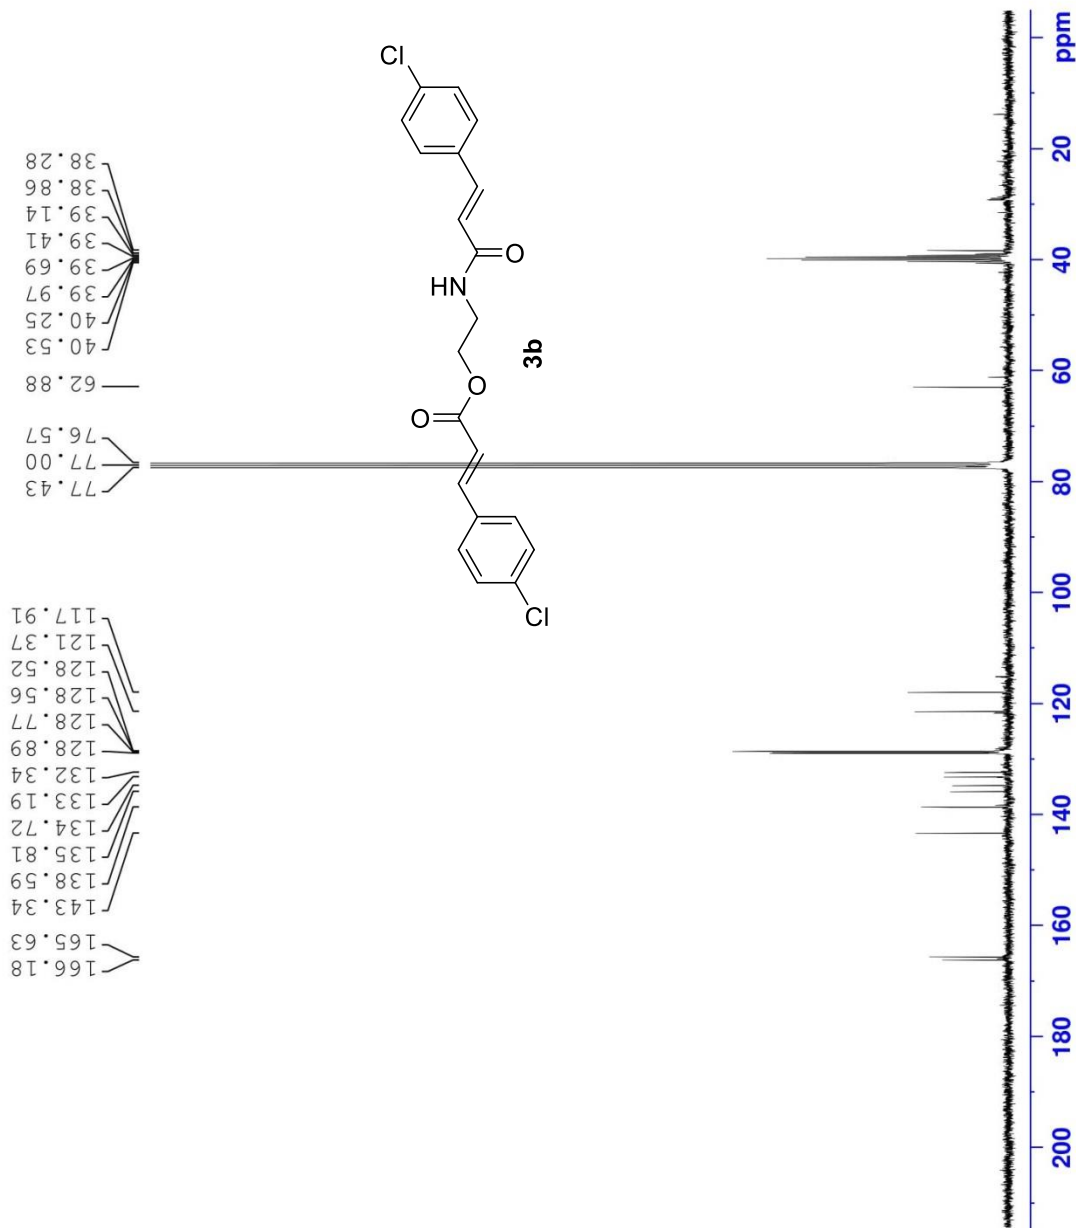

Current Data Parameters  
NAME C2552D4  
EXPNO 1  
PROCNO 1

F2 - Acquisition Parameters  
Date\_ 20180907  
Time 20.25  
INSTRUM spect  
PROBHD 5 mm BBO BB-1H  
PULPROG zgpg30  
TD 65536  
SOLVENT CDCl3  
NS 3072  
DS 4  
SWH 18028.846 Hz  
FIDRES 0.275098 Hz  
AQ 1.8175317 sec  
RG 1150  
DW 27.733 usec  
DE 6.50 usec  
TE 300.0 K  
D1 2.00000000 sec  
D11 0.03000000 sec  
TD0 1

===== CHANNEL f1 =====  
SFO1 75.4752949 MHz  
NUC1 13C  
P1 9.47 usec  
PLW1 38.00000000 W

===== CHANNEL f2 =====  
SFO2 300.1312005 MHz  
NUC2 1H  
CPDPRG2 waltz16  
PCPD2 90.00 usec  
PLW2 10.69999981 W  
PLW12 0.22325000 W  
PLW13 0.11229000 W

F2 - Processing parameters  
SI 32768  
SF 75.4681364 MHz  
WDW EM  
SSB 0  
LB 1.00 Hz  
GB 0  
PC 1.40

# UOH -SCHOOL OF CHEMISTRY -HRMS

## Analysis Info

Analysis Name D:\Data\2018\PROF MP\DEC\9.d  
 Method tune\_low\_PosR.m  
 Sample Name 9--DCM-MEOH  
 Comment

Acquisition Date 12/12/2018 1:53:42 PM

Operator UOH-Chemistry  
 Instrument maXis 10138

## Acquisition Parameter

|             |            |                       |           |                  |           |
|-------------|------------|-----------------------|-----------|------------------|-----------|
| Source Type | ESI        | Ion Polarity          | Positive  | Set Nebulizer    | 0.3 Bar   |
| Focus       | Not active | Set Capillary         | 3800 V    | Set Dry Heater   | 250 °C    |
| Scan Begin  | 100 m/z    | Set End Plate Offset  | -500 V    | Set Dry Gas      | 5.0 l/min |
| Scan End    | 2500 m/z   | Set Collision Cell RF | 350.0 Vpp | Set Divert Valve | Waste     |

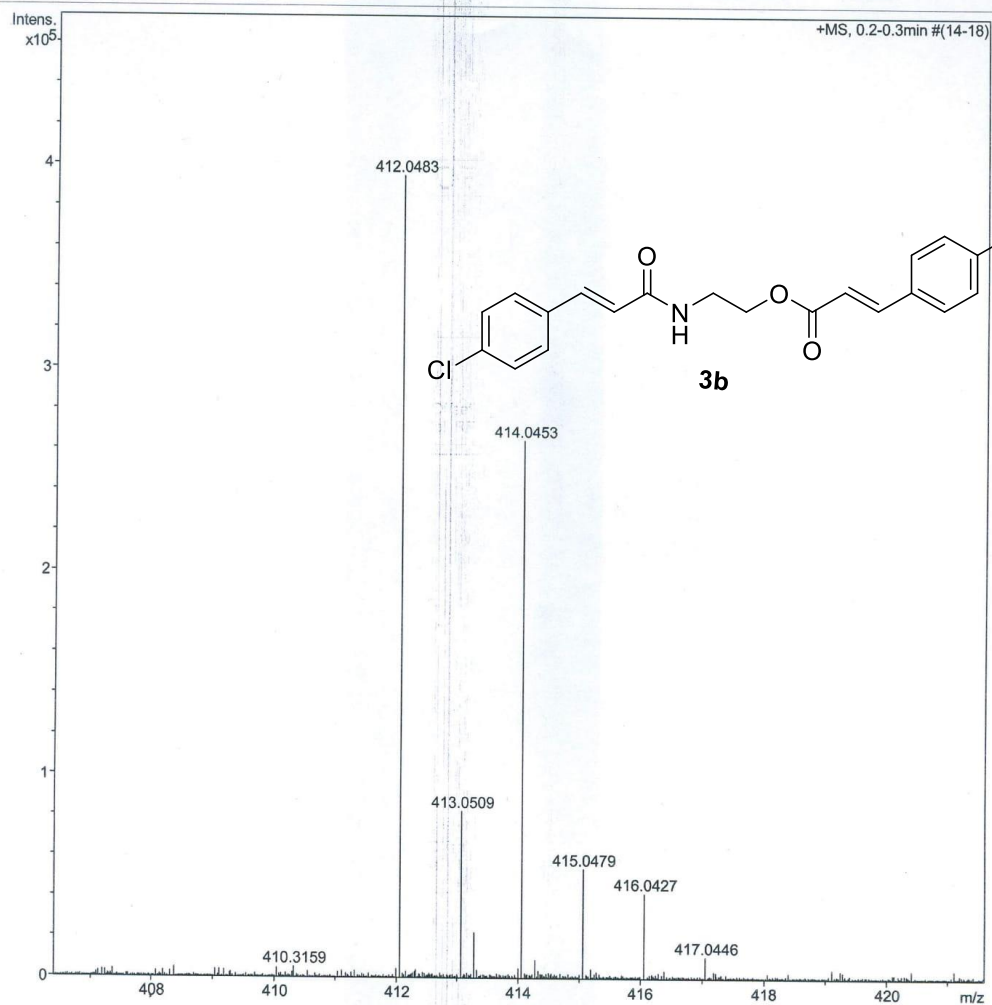

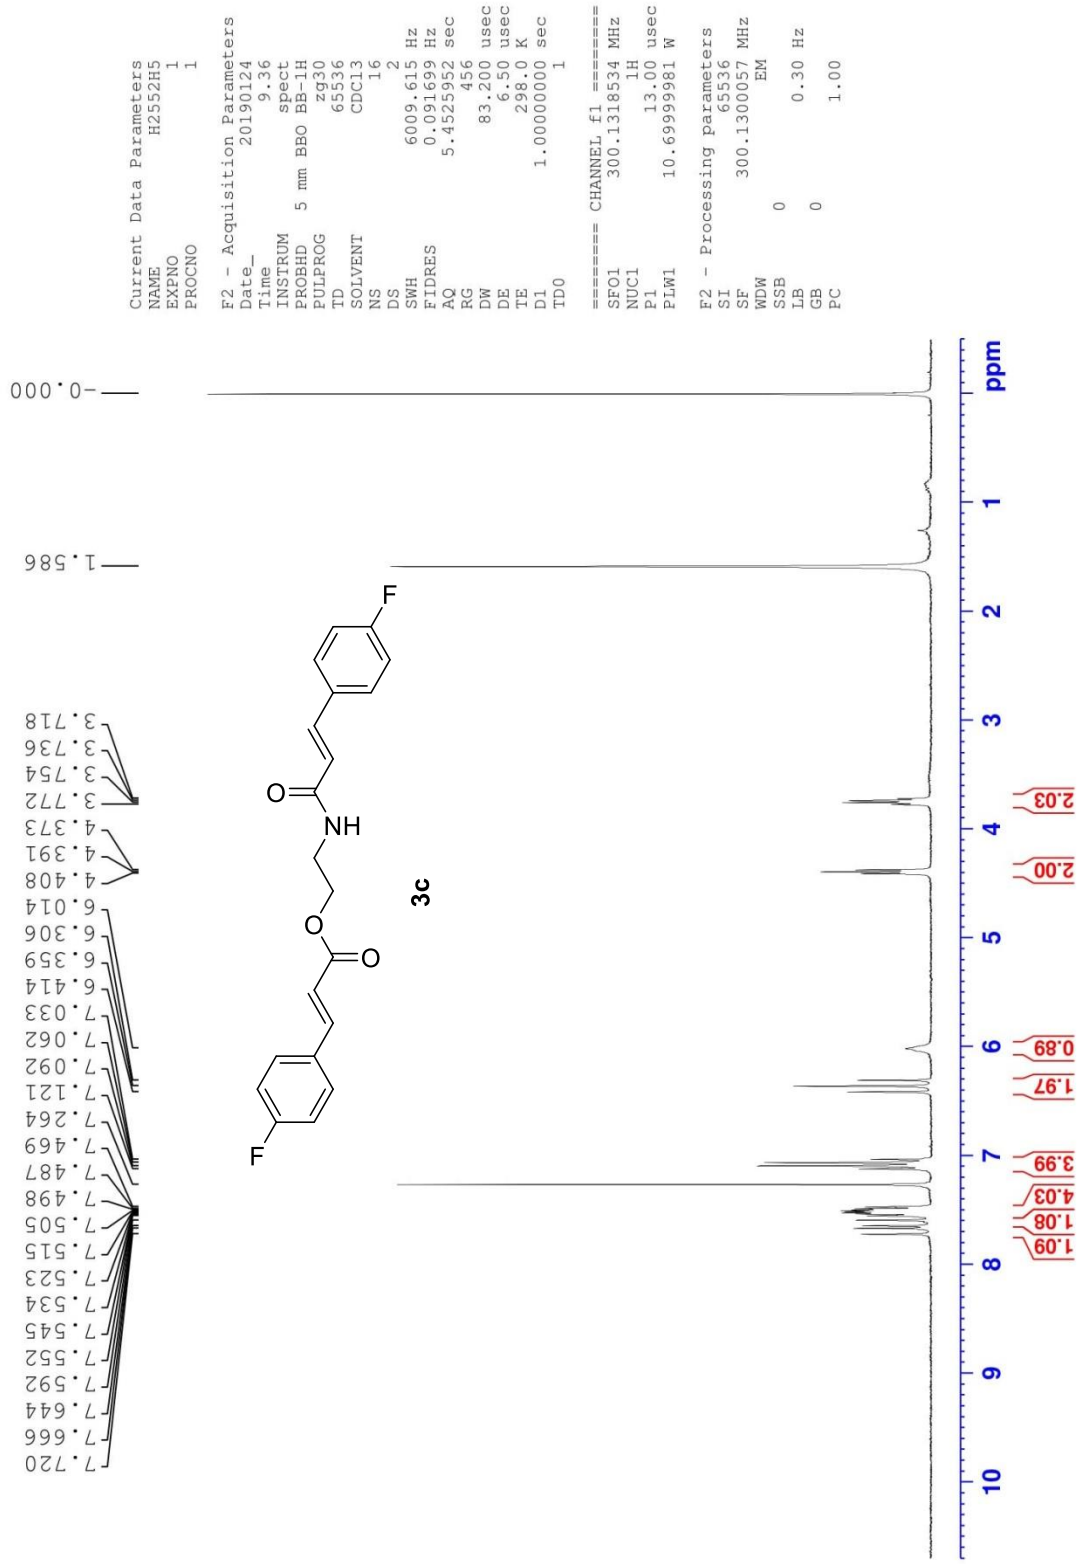

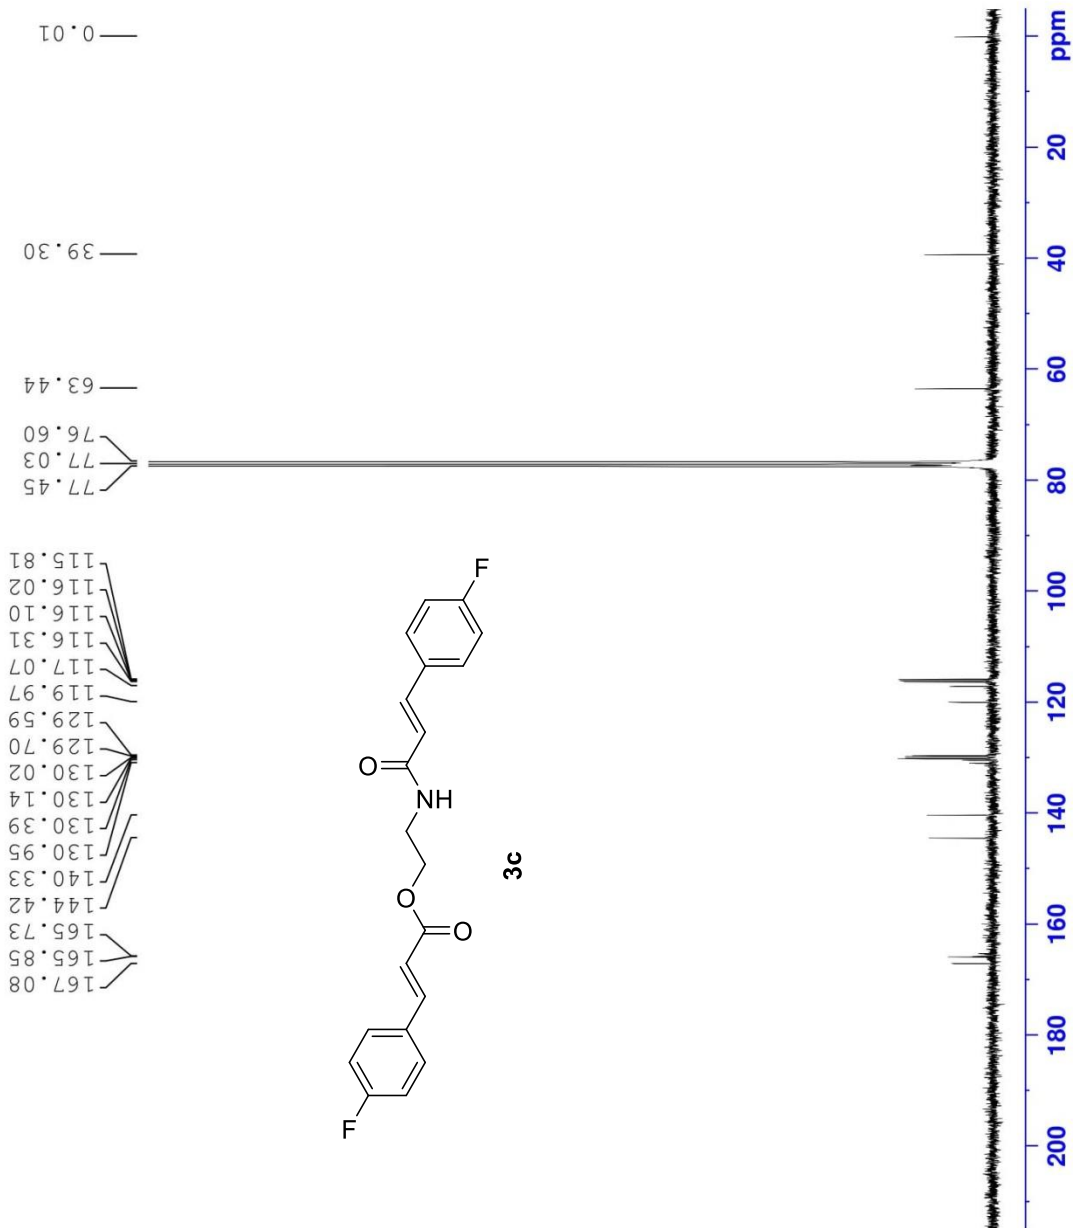

# UOH -SCHOOL OF CHEMISTRY -HRMS

## Analysis Info

Analysis Name D:\Data\2018\PROF MP\DEC\2.d  
 Method tune\_low.m  
 Sample Name 2  
 Comment

Acquisition Date 12/11/2018 4:14:49 PM

Operator UOH-Chemistry  
 Instrument maXis 10138

## Acquisition Parameter

|             |            |                       |           |                  |           |
|-------------|------------|-----------------------|-----------|------------------|-----------|
| Source Type | ESI        | Ion Polarity          | Positive  | Set Nebulizer    | 0.4 Bar   |
| Focus       | Not active | Set Capillary         | 3800 V    | Set Dry Heater   | 200 °C    |
| Scan Begin  | 50 m/z     | Set End Plate Offset  | -500 V    | Set Dry Gas      | 6.0 l/min |
| Scan End    | 1800 m/z   | Set Collision Cell RF | 350.0 Vpp | Set Divert Valve | Waste     |

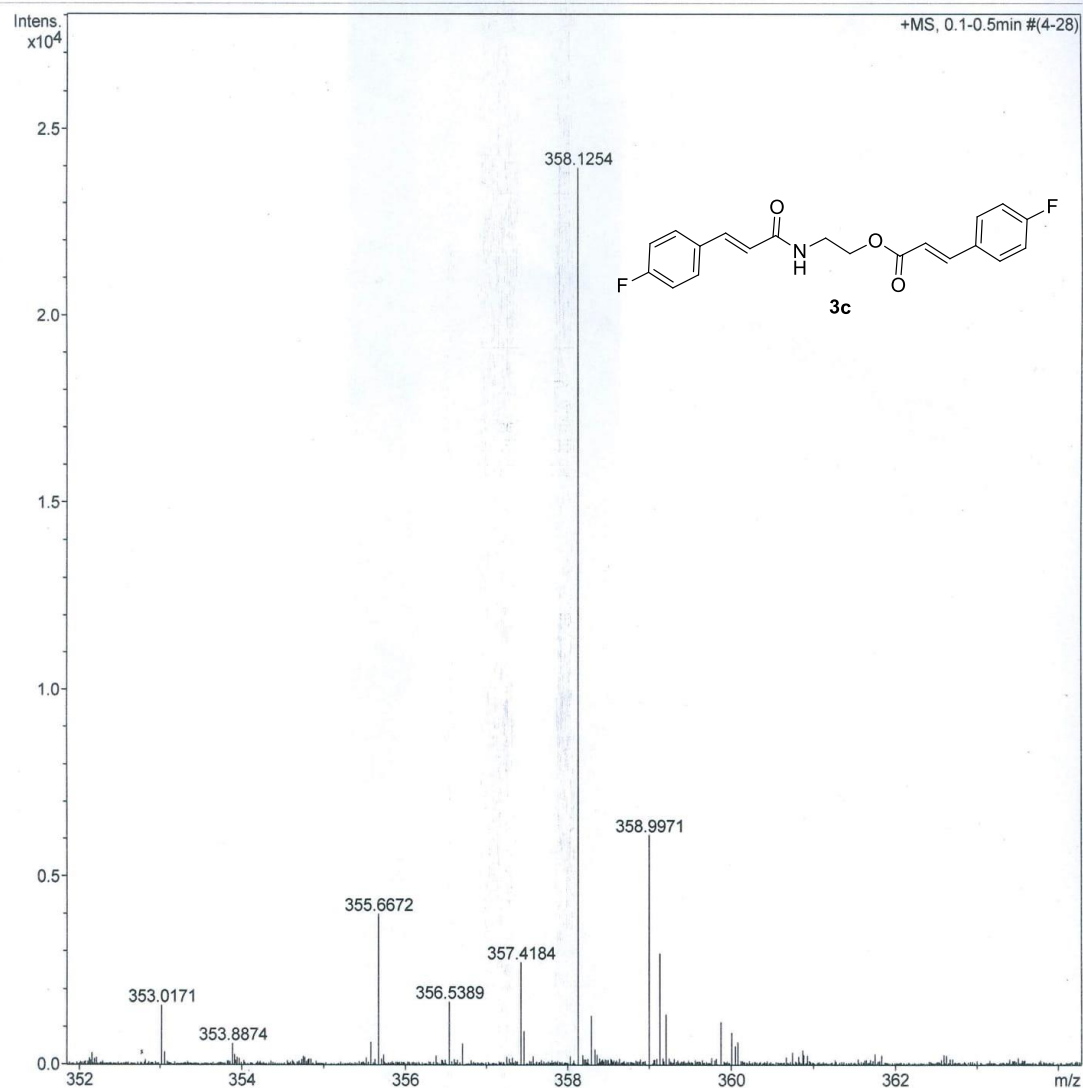

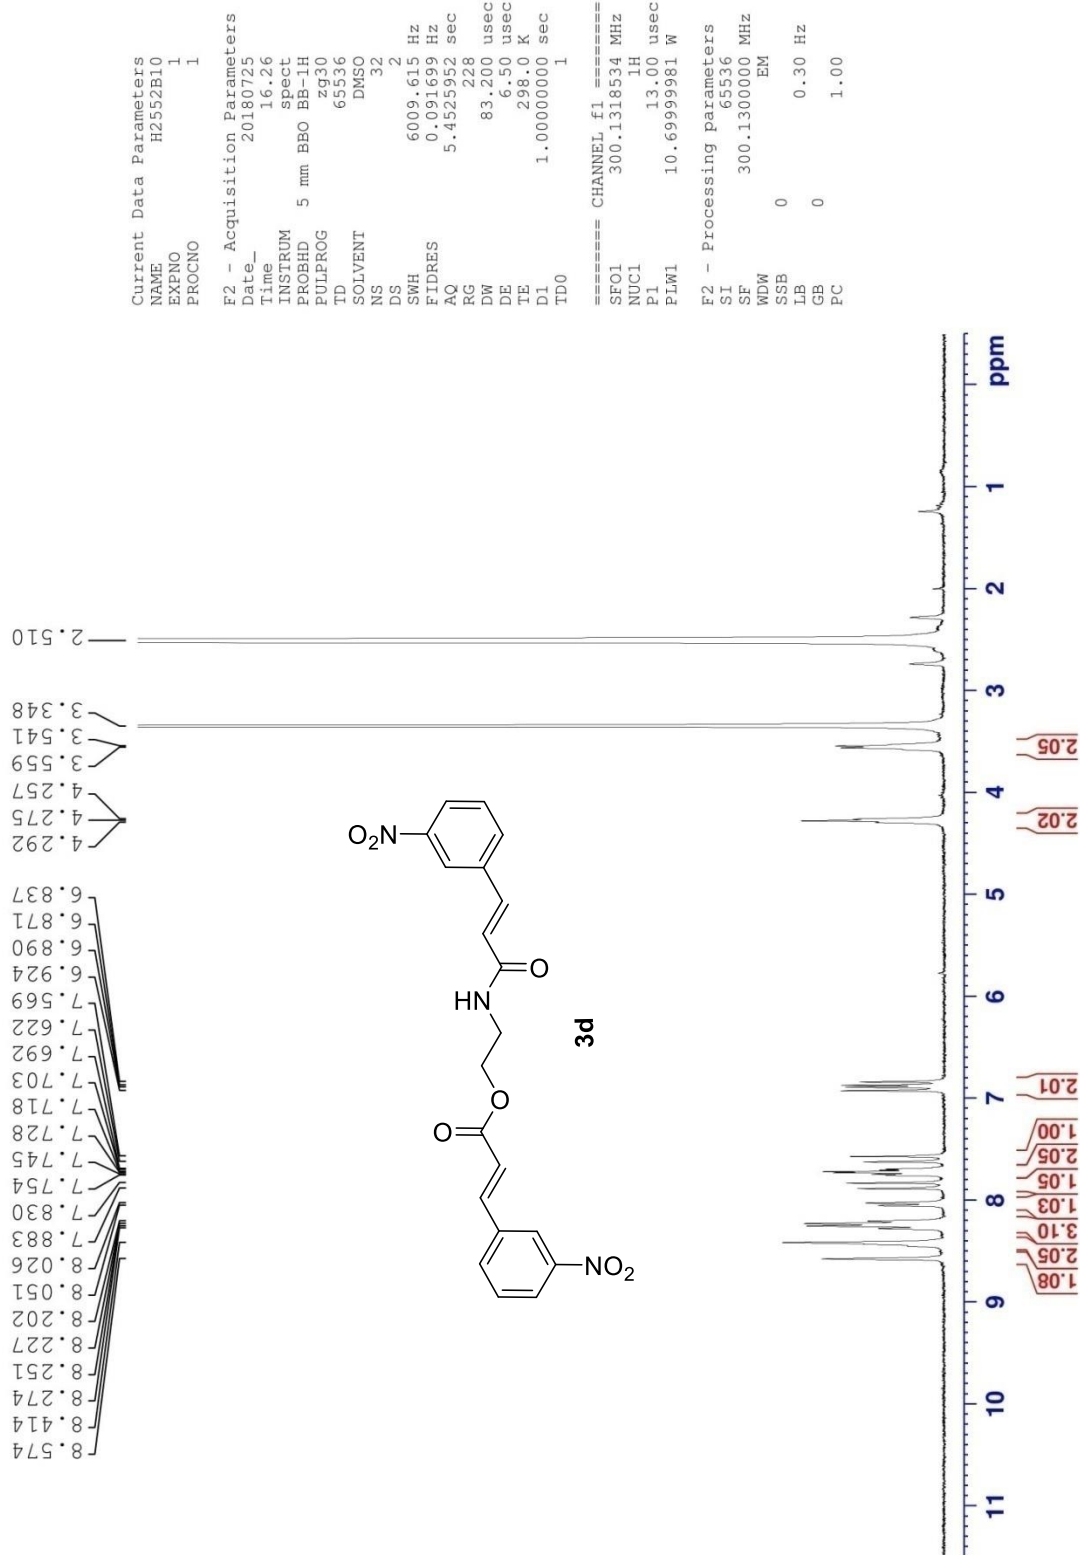

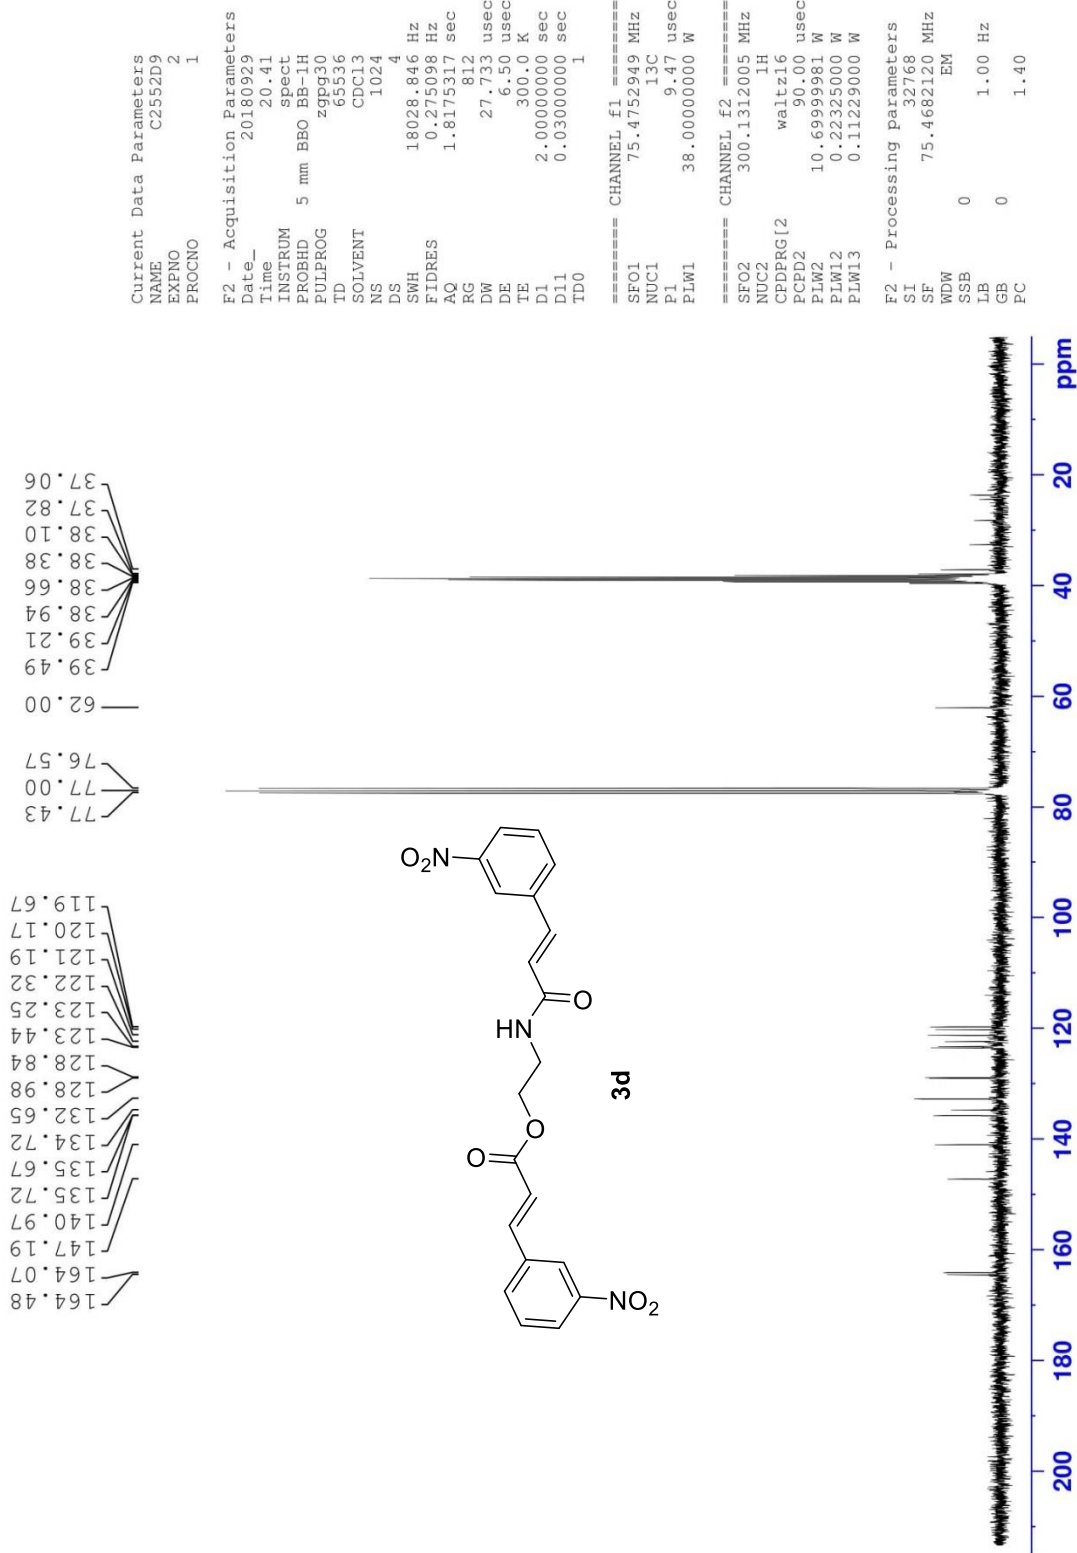

# UOH -SCHOOL OF CHEMISTRY -HRMS

## Analysis Info

Analysis Name D:\Data\2018\PROF MP\DEC\1.d  
 Method tune\_low.m  
 Sample Name 1  
 Comment

Acquisition Date 12/11/2018 4:14:15 PM

Operator UOH-Chemistry  
 Instrument maXis 10138

## Acquisition Parameter

Source Type ESI  
 Focus Not active  
 Scan Begin 50 m/z  
 Scan End 1800 m/z

Ion Polarity Positive  
 Set Capillary 3800 V  
 Set End Plate Offset -500 V  
 Set Collision Cell RF 350.0 Vpp

Set Nebulizer 0.4 Bar  
 Set Dry Heater 200 °C  
 Set Dry Gas 6.0 l/min  
 Set Divert Valve Waste

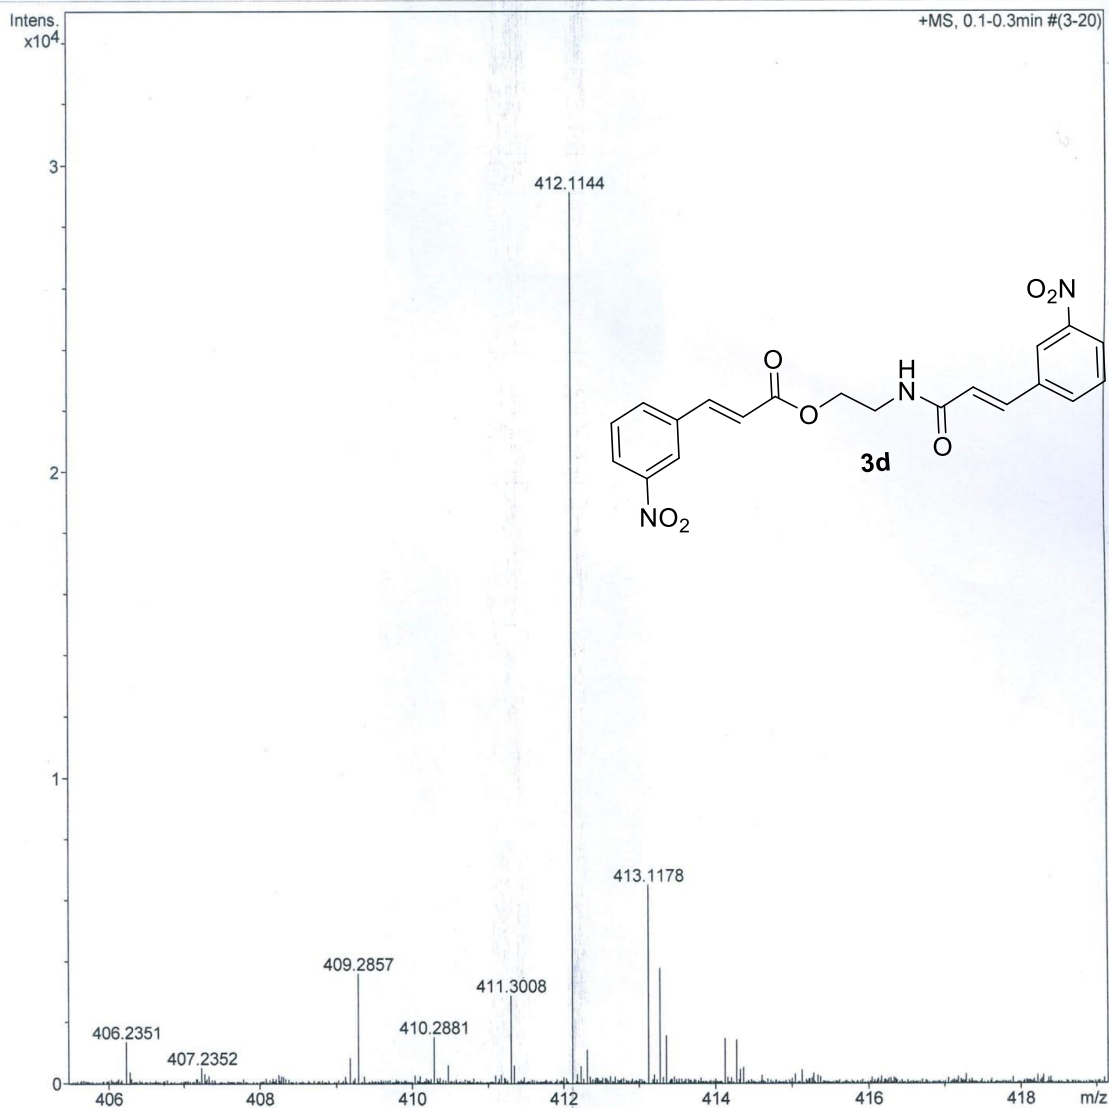

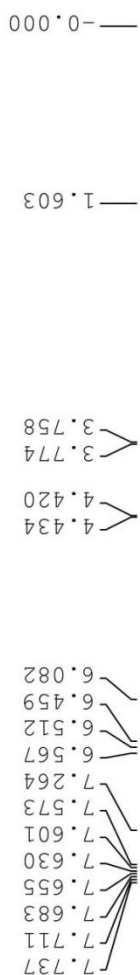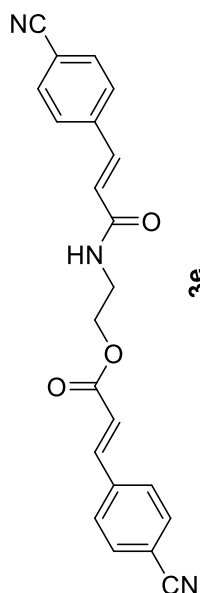

Current Data Parameters  
 NAME H2552B16  
 EXPNO 1  
 PROCNO 1

F2 - Acquisition Parameters  
 Date\_ 20180731  
 Time 16.06  
 INSTRUM spect  
 PROBHD 5 mm BBO BB-1H  
 PULPROG zg30  
 TD 65536  
 SOLVENT CDCl3  
 NS 16  
 DS 2  
 SWH 6009.615 Hz  
 FIDRES 0.091699 Hz  
 AQ 5.4525952 sec  
 RG 456  
 DW 83.200 usec  
 DE 6.50 usec  
 TE 298.0 K  
 D1 1.00000000 sec  
 TD0 1

===== CHANNEL f1 =====  
 SFO1 300.1318534 MHz  
 NUC1 1H  
 P1 13.00 usec  
 PLW1 10.6999981 W

F2 - Processing parameters  
 SI 65536  
 SF 300.1300056 MHz  
 WDW EM  
 SSB 0  
 LB 0.30 Hz  
 GB 0  
 PC 1.00

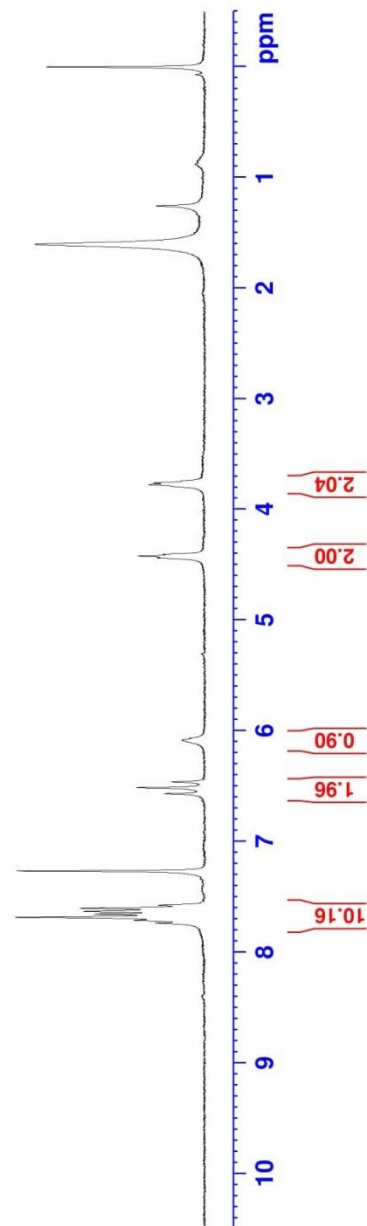

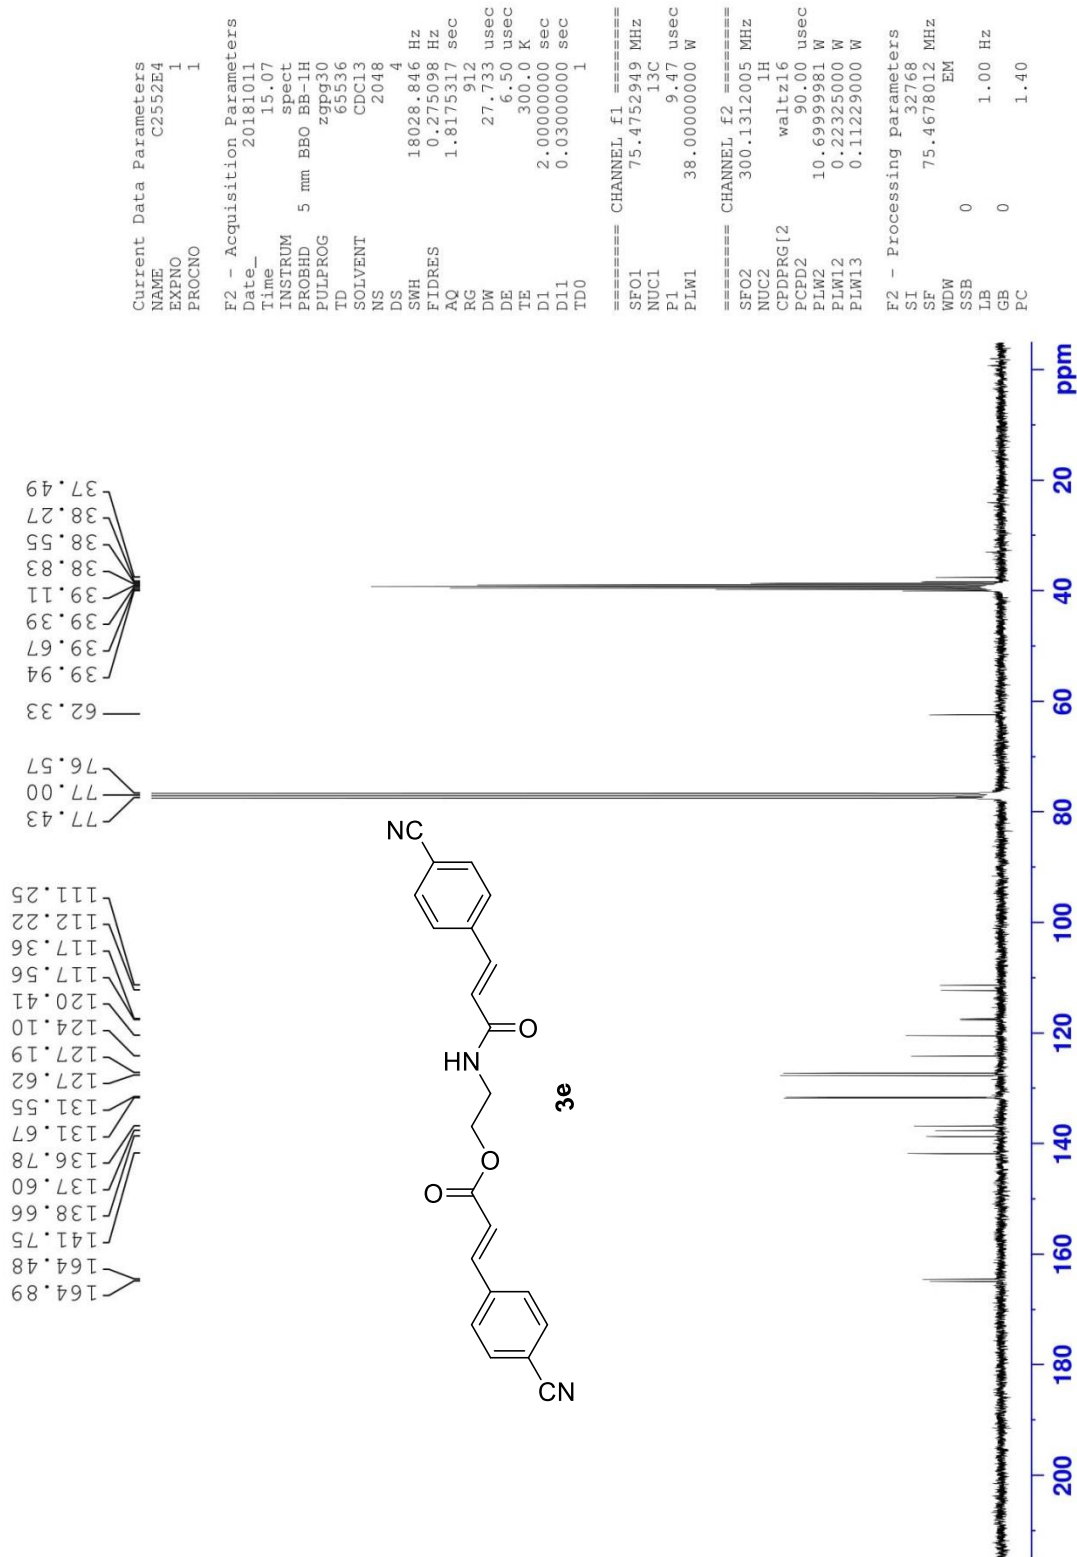

# UOH -SCHOOL OF CHEMISTRY -HRMS

## Analysis Info

Analysis Name D:\Data\2018\PROF MP\DEC\3.d  
 Method tune\_low.m  
 Sample Name 3  
 Comment

Acquisition Date 12/11/2018 4:18:23 PM

Operator UOH-Chemistry  
 Instrument maXis 10138

## Acquisition Parameter

|             |            |                       |           |                  |           |
|-------------|------------|-----------------------|-----------|------------------|-----------|
| Source Type | ESI        | Ion Polarity          | Positive  | Set Nebulizer    | 0.4 Bar   |
| Focus       | Not active | Set Capillary         | 3800 V    | Set Dry Heater   | 200 °C    |
| Scan Begin  | 50 m/z     | Set End Plate Offset  | -500 V    | Set Dry Gas      | 6.0 l/min |
| Scan End    | 1800 m/z   | Set Collision Cell RF | 350.0 Vpp | Set Divert Valve | Waste     |

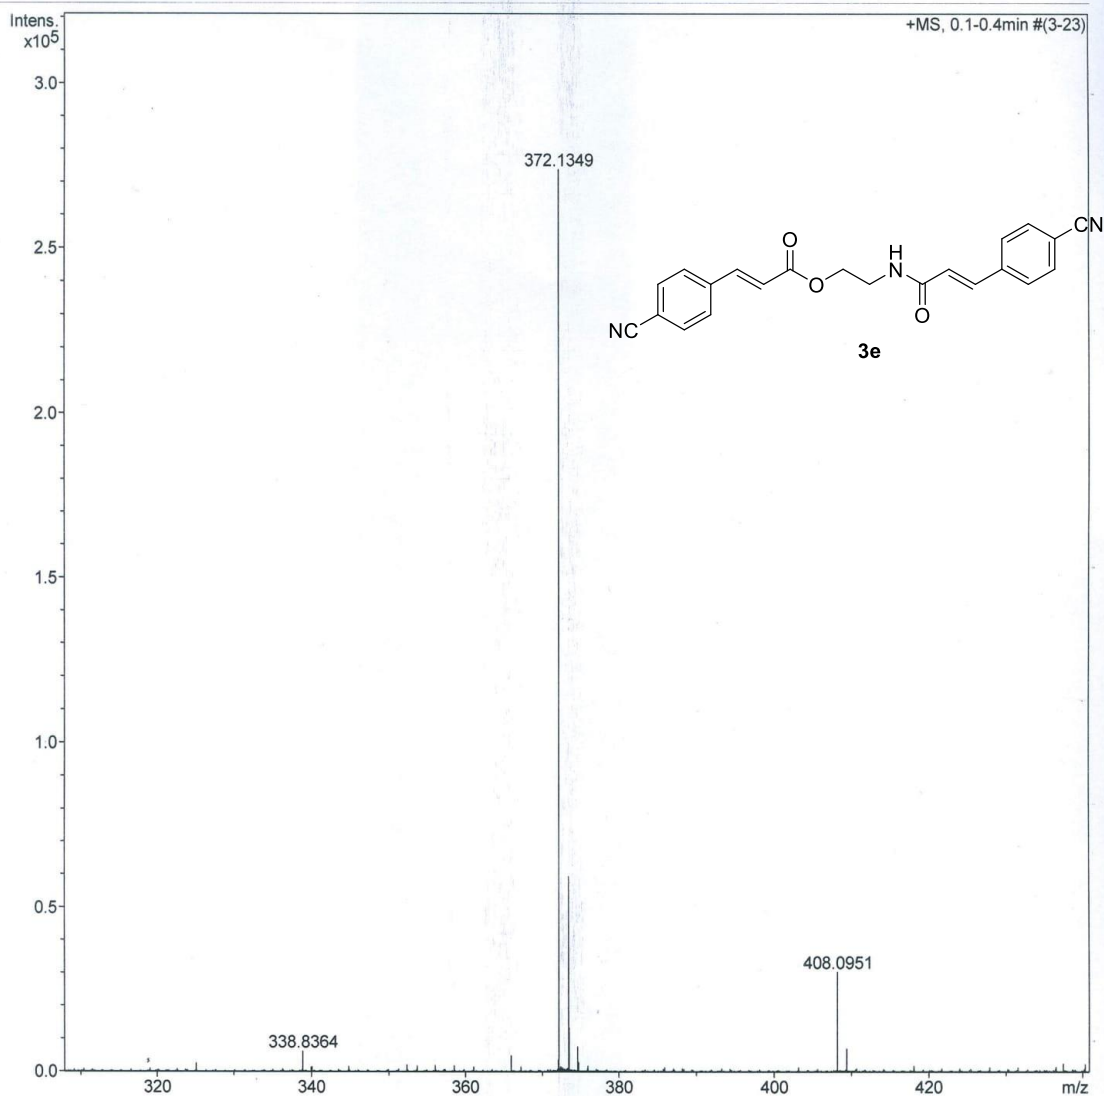

8.876  
8.870  
8.822  
8.816  
8.610  
8.462  
8.458  
8.454  
8.451  
8.434  
8.431  
8.427  
8.422  
8.417  
8.390  
8.386  
8.366  
8.363  
8.359  
8.356  
8.192  
8.188  
8.166  
8.162  
7.715  
7.701  
7.689  
7.675  
7.662  
7.648  
7.265  
6.847  
4.679  
4.662  
4.645  
3.977  
3.959  
3.942  
3.924  
1.629

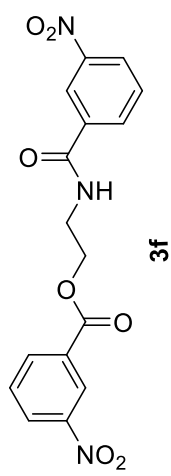

Current Data Parameters  
NAME H2552J8  
EXPNO 1  
PROCNO 1

F2 - Acquisition Parameters  
Date\_ 20190308  
Time 16.52  
INSTRUM spect  
PROBHD 5 mm BBO BB-1H  
PULPROG zg30  
TD 65536  
SOLVENT CDCl3  
NS 16  
DS 2  
SWH 6009.615 Hz  
FIDRES 0.091699 Hz  
AQ 5.4525952 sec  
RG 406  
DW 83.200 usec  
DE 6.50 usec  
TE 298.0 K  
D1 1.0000000 sec  
TD0 1

===== CHANNEL f1 =====  
SFO1 300.1318534 MHz  
NUC1 1H  
P1 13.00 usec  
PLW1 10.6999981 W

F2 - Processing parameters  
SI 65536  
SF 300.1300051 MHz  
WDW EM  
SSB 0  
LB 0.30 Hz  
GB 0  
PC 1.00

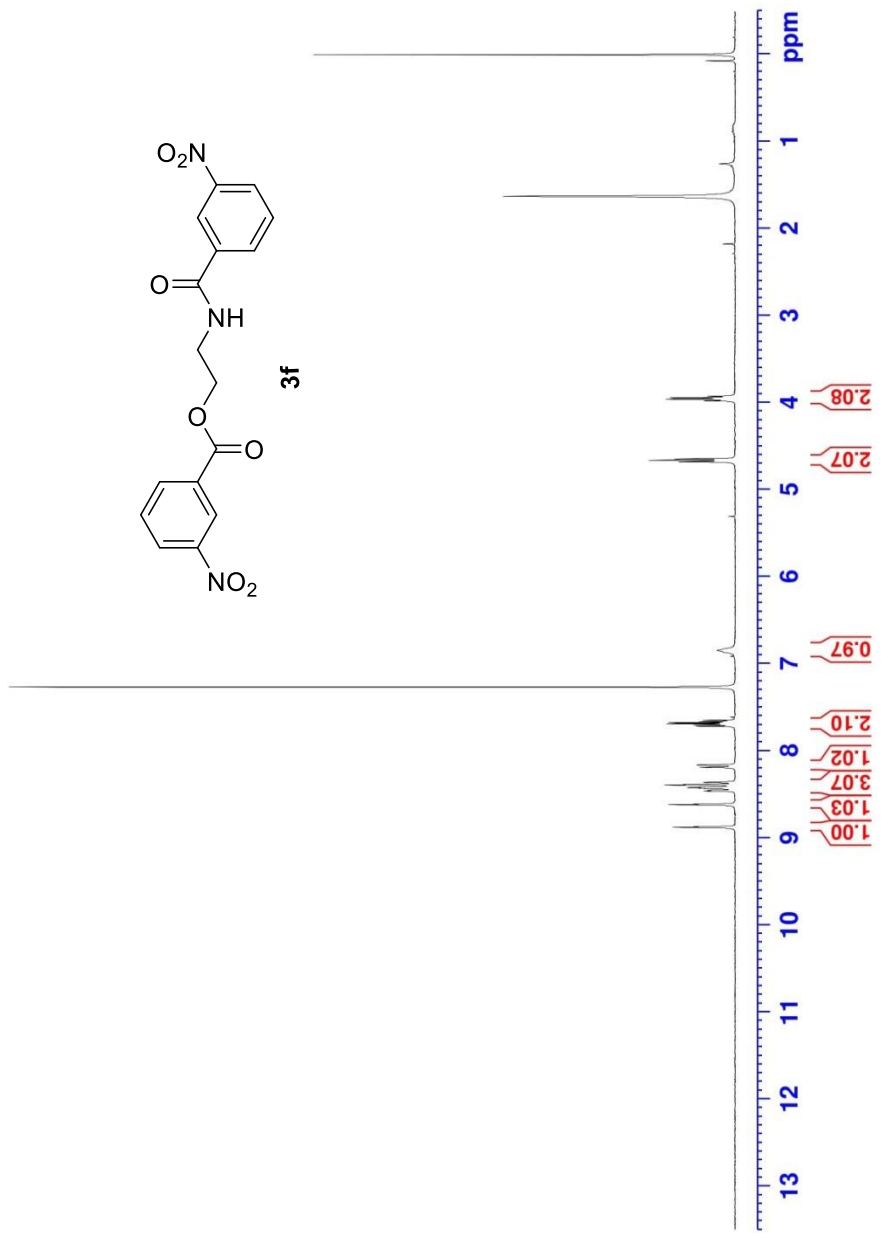

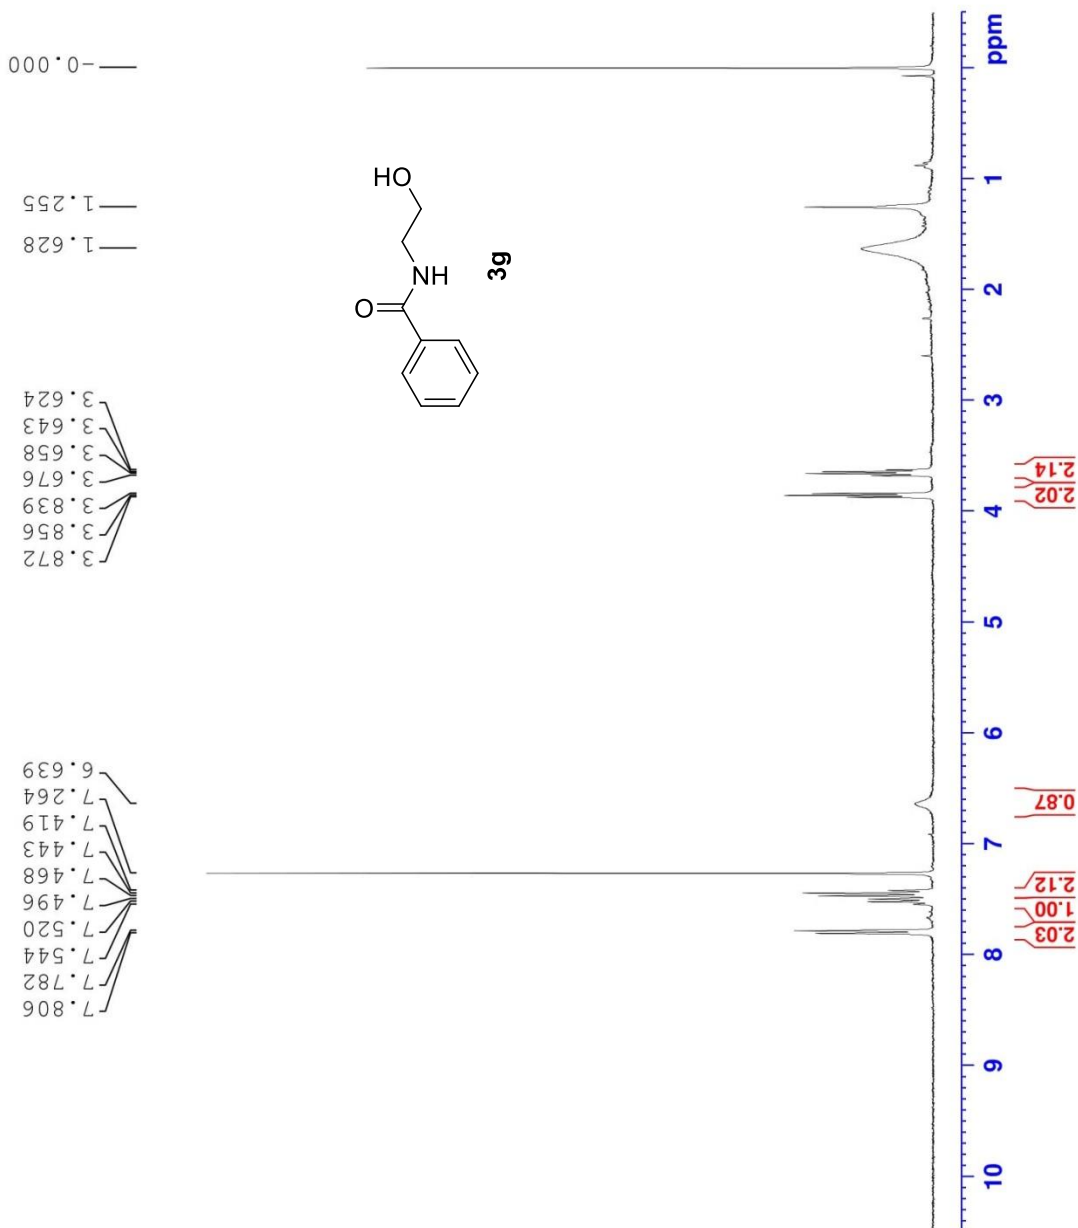

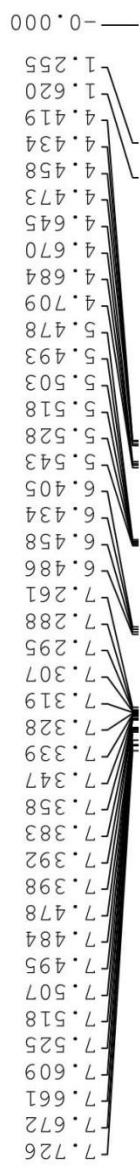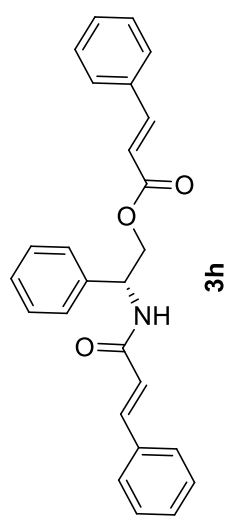

Current Data Parameters  
 NAME H2552D2  
 EXPNO 1  
 PROCNO 1

F2 - Acquisition Parameters  
 Date\_ 20180831  
 Time 16.58  
 INSTRUM spect  
 PROBHD 5 mm BBO BB-1H  
 PULPROG zg30  
 TD 65536  
 SOLVENT CDCl3  
 NS 16  
 DS 2  
 SWH 6009.615 Hz  
 FIDRES 0.091899 Hz  
 AQ 5.4525952 sec  
 RG 228  
 DW 83.200 usec  
 DE 6.50 usec  
 TE 298.0 K  
 D1 1.00000000 sec  
 ID0 1

===== CHANNEL f1 =====  
 SFO1 300.1318534 MHz  
 NUC1 1H  
 P1 13.00 usec  
 PLW1 10.69999981 W

F2 - Processing parameters  
 SI 65536  
 SF 300.1300063 MHz  
 WDW EM  
 SSB 0  
 LB 0  
 GB 0  
 PC 1.00

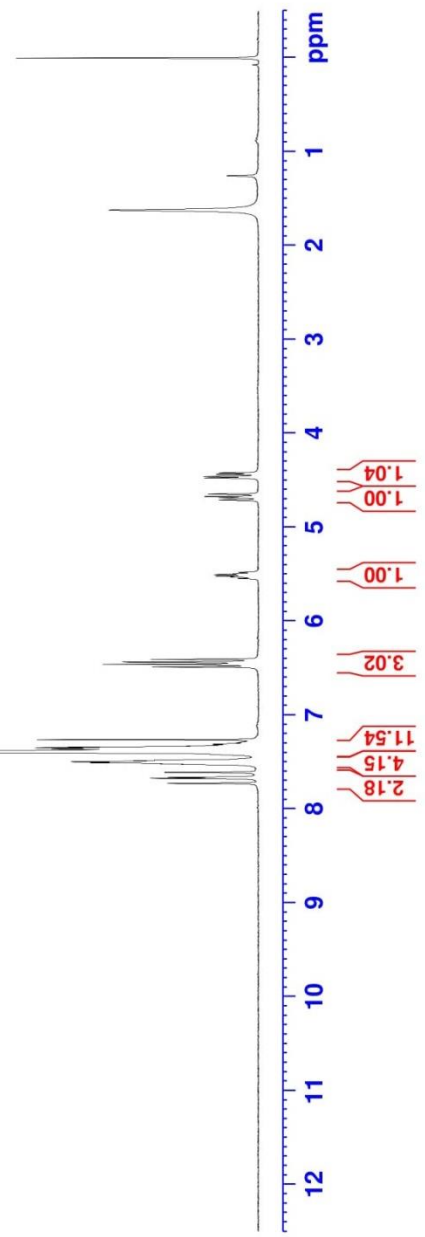

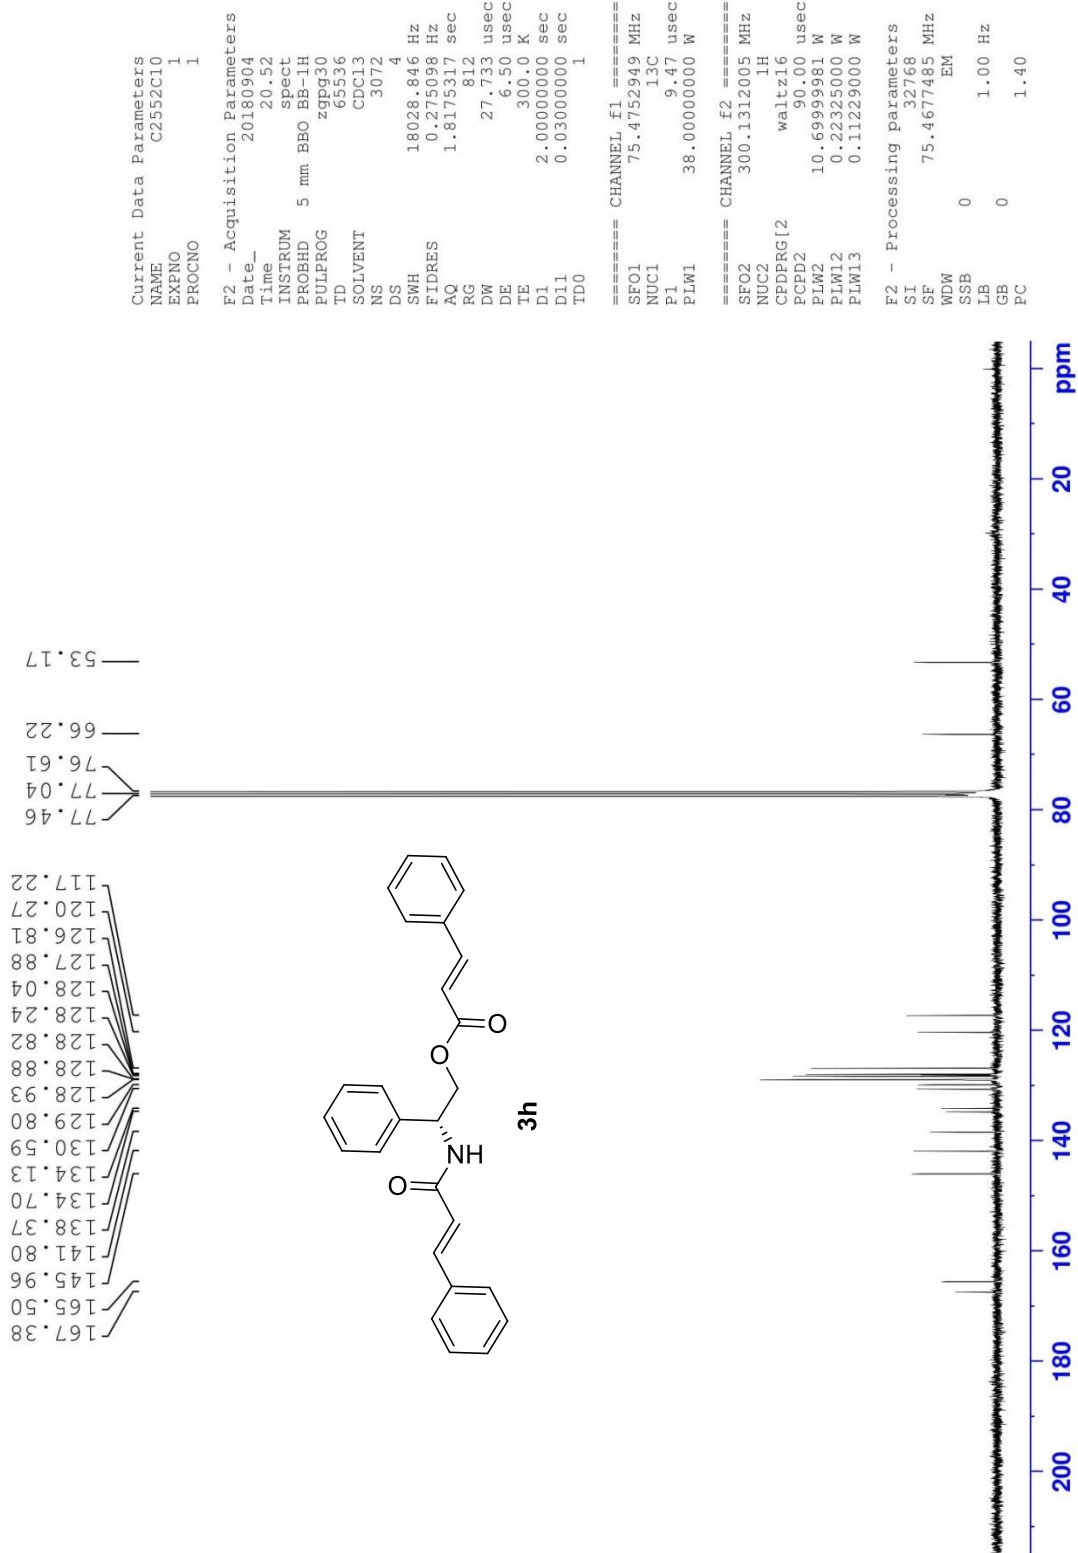

# UOH -SCHOOL OF CHEMISTRY -HRMS

## Analysis Info

Analysis Name D:\Data\2018\PROF MP\DEC\13.d  
 Method tune\_low.m  
 Sample Name 13  
 Comment

Acquisition Date 12/11/2018 4:45:59 PM

Operator UOH-Chemistry  
 Instrument maXis 10138

## Acquisition Parameter

|             |            |                       |           |                  |           |
|-------------|------------|-----------------------|-----------|------------------|-----------|
| Source Type | ESI        | Ion Polarity          | Positive  | Set Nebulizer    | 0.4 Bar   |
| Focus       | Not active | Set Capillary         | 3800 V    | Set Dry Heater   | 200 °C    |
| Scan Begin  | 50 m/z     | Set End Plate Offset  | -500 V    | Set Dry Gas      | 6.0 l/min |
| Scan End    | 1800 m/z   | Set Collision Cell RF | 350.0 Vpp | Set Divert Valve | Waste     |

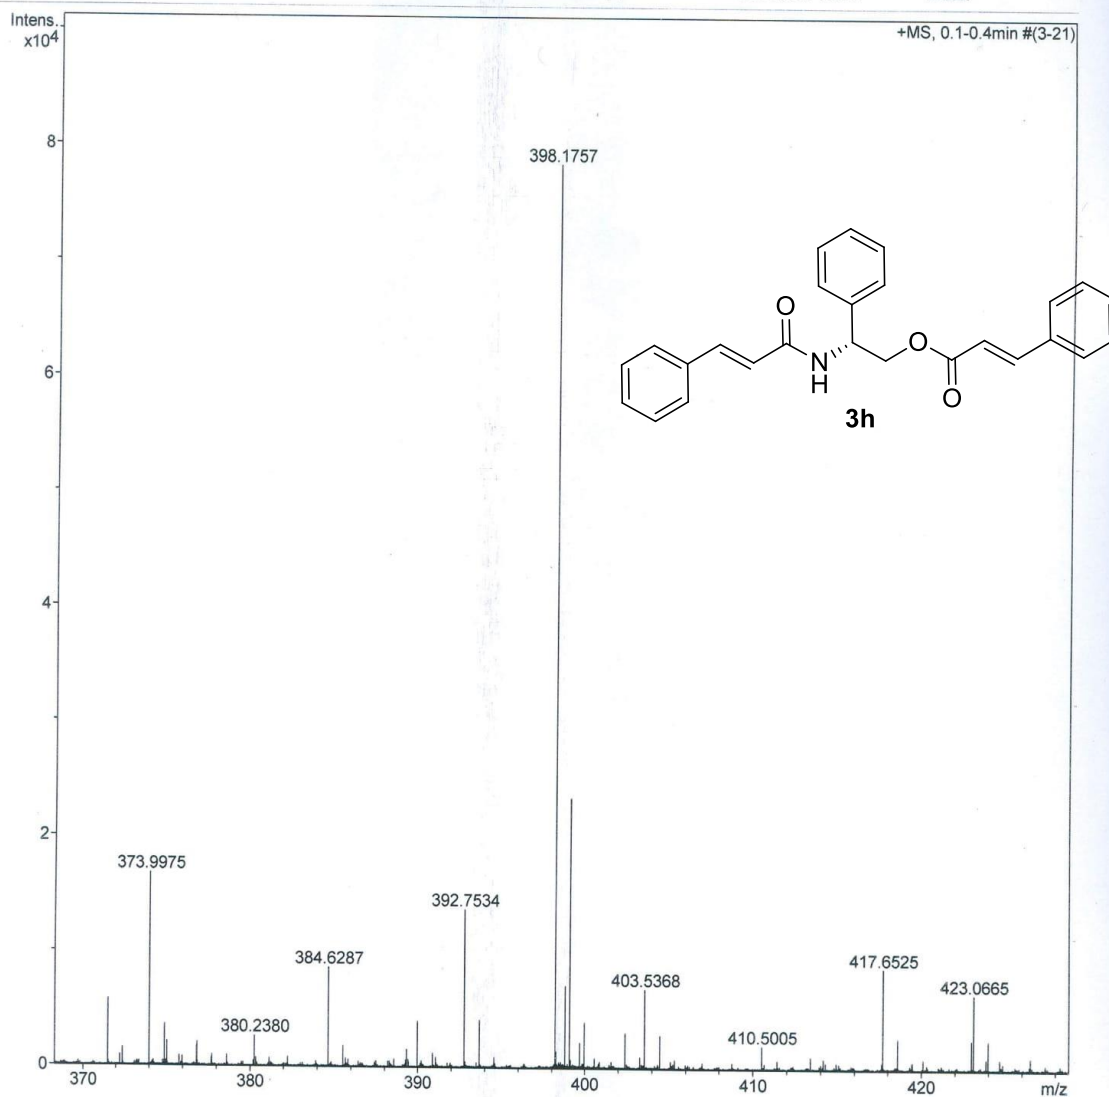

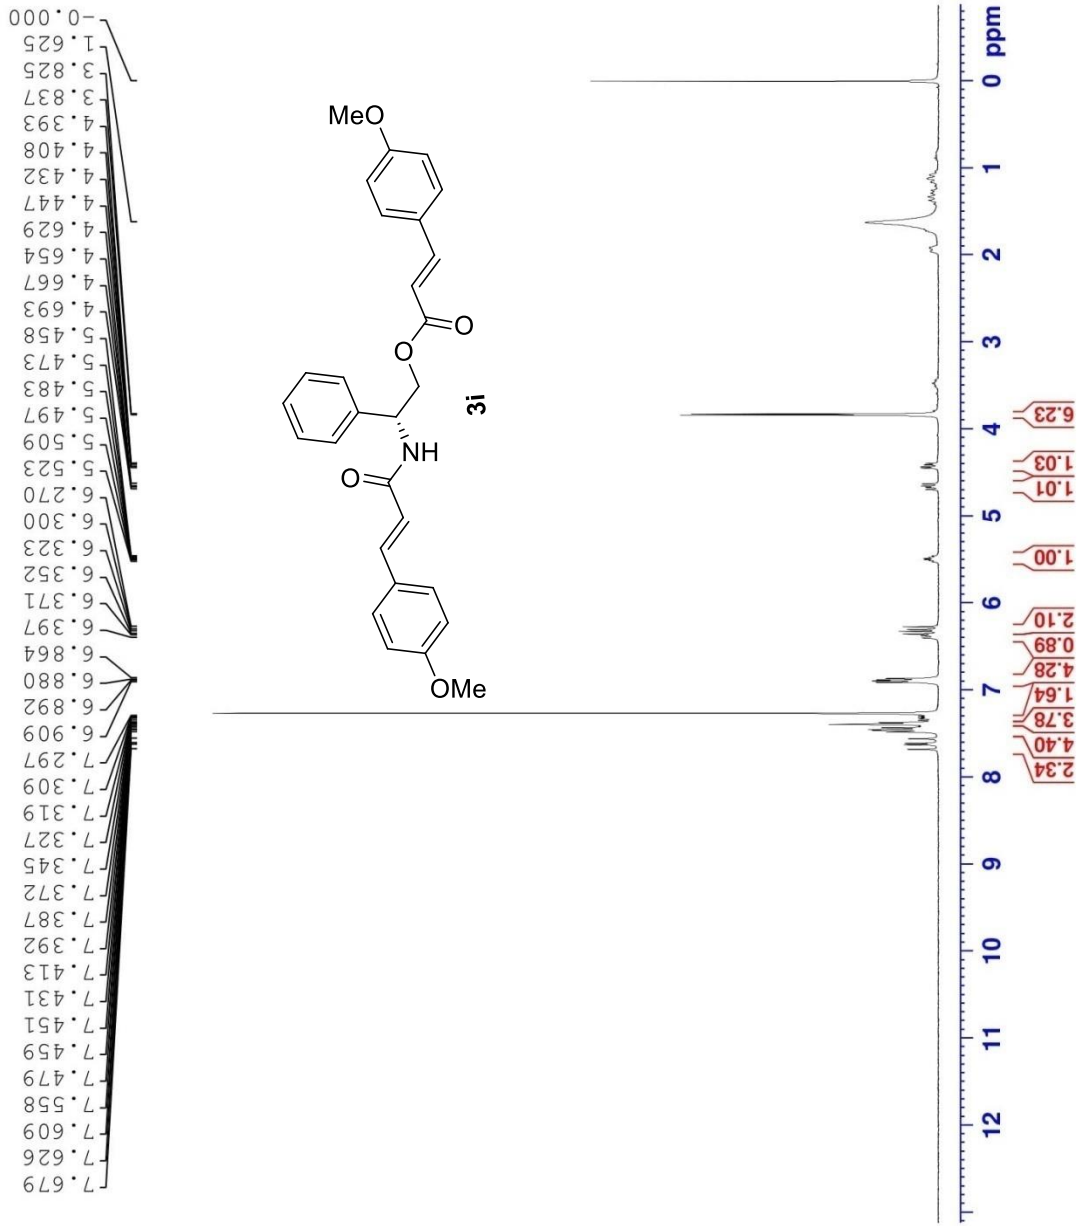

```

Current Data Parameters
NAME      H2552017
EXPNO     1
PROCNO    1

F2 - Acquisition Parameters
Date_     20190314
Time      11.18
INSTRUM   spect
PROBHD    5 mm BBO BB-1H
PULPROG   zg30
TD         65536
SOLVENT   CDCl3
NS         16
DS         2
SWH        6009.615 Hz
FIDRES     0.091699 Hz
AQ         5.4525952 sec
RG         362
DW         83.200 usec
DE         6.50 usec
TE         298.0 K
D1         1.0000000 sec
ID0        1

===== CHANNEL f1 =====
SFO1      300.1318534 MHz
NUC1      1H
P1        13.00 usec
PLW1      10.69999981 W

F2 - Processing parameters
SI         65536
SF         300.1300059 MHz
WDW        EM
SSB        0
LB         0.30 Hz
GB         0
PC         1.00

```

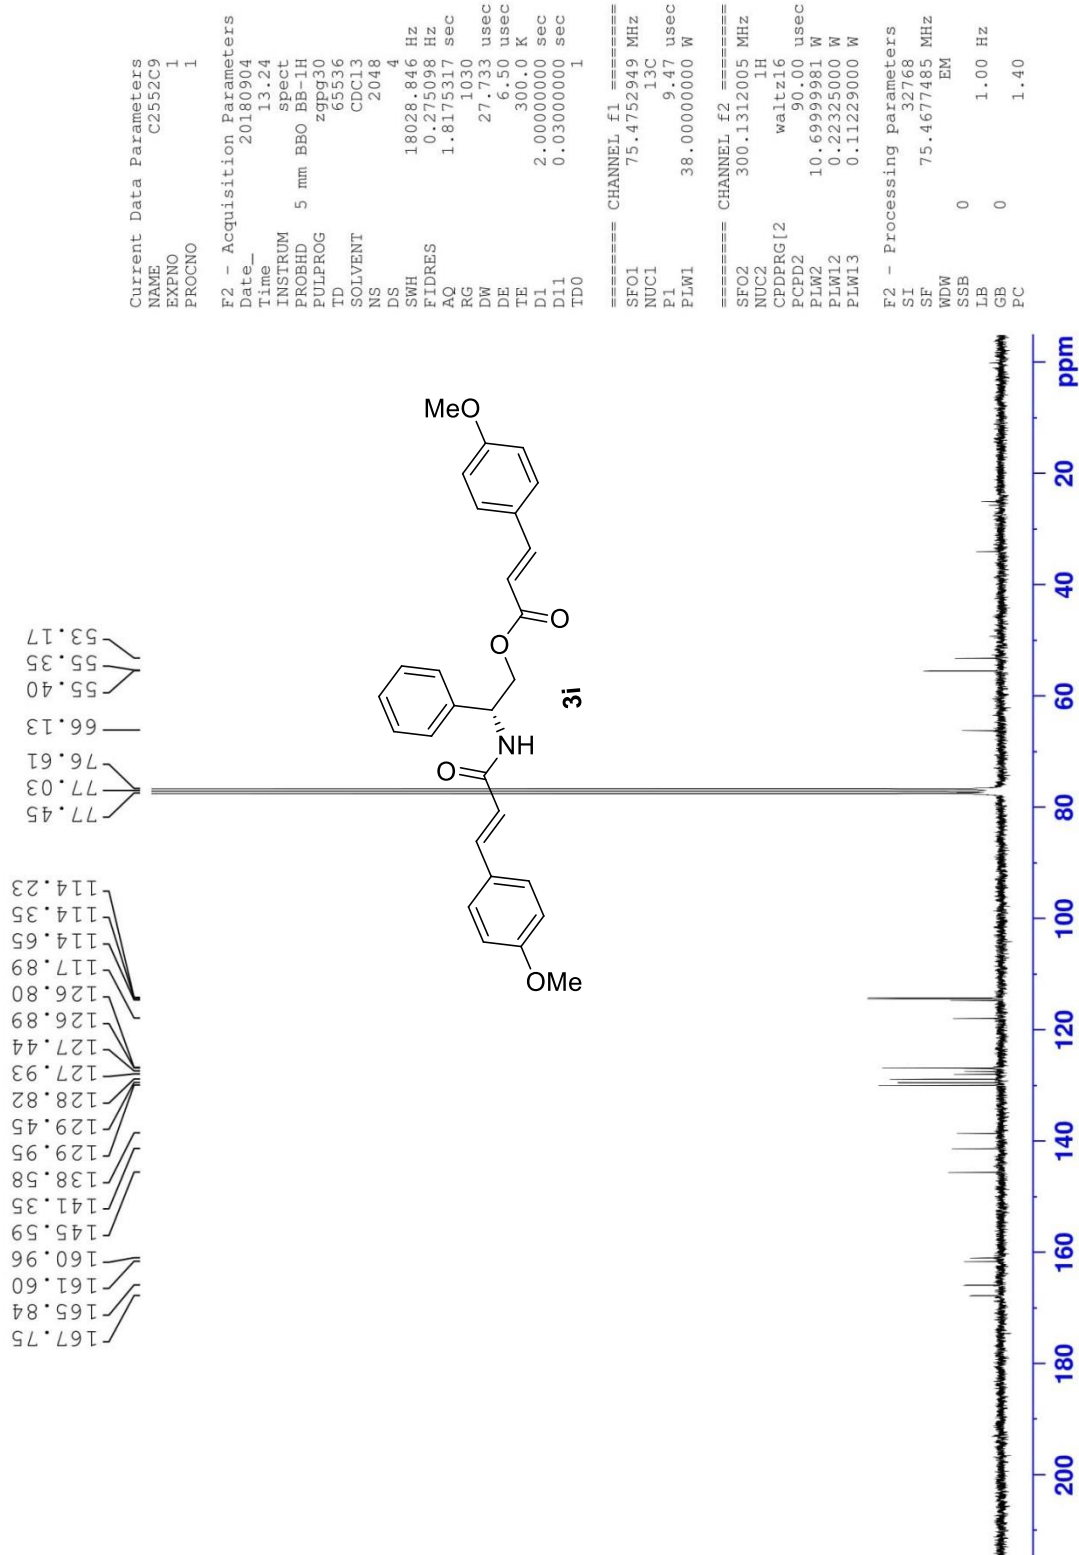

# UOH -SCHOOL OF CHEMISTRY -HRMS

## Analysis Info

Analysis Name D:\Data\2018\PROF MP\DEC\7.d  
 Method tune\_low.m  
 Sample Name 7  
 Comment

Acquisition Date 12/11/2018 4:30:41 PM

Operator UOH-Chemistry  
 Instrument maXis 10138

## Acquisition Parameter

Source Type ESI  
 Focus Not active  
 Scan Begin 50 m/z  
 Scan End 1800 m/z

Ion Polarity Positive  
 Set Capillary 3800 V  
 Set End Plate Offset -500 V  
 Set Collision Cell RF 350.0 Vpp

Set Nebulizer 0.4 Bar  
 Set Dry Heater 200 °C  
 Set Dry Gas 6.0 l/min  
 Set Divert Valve Waste

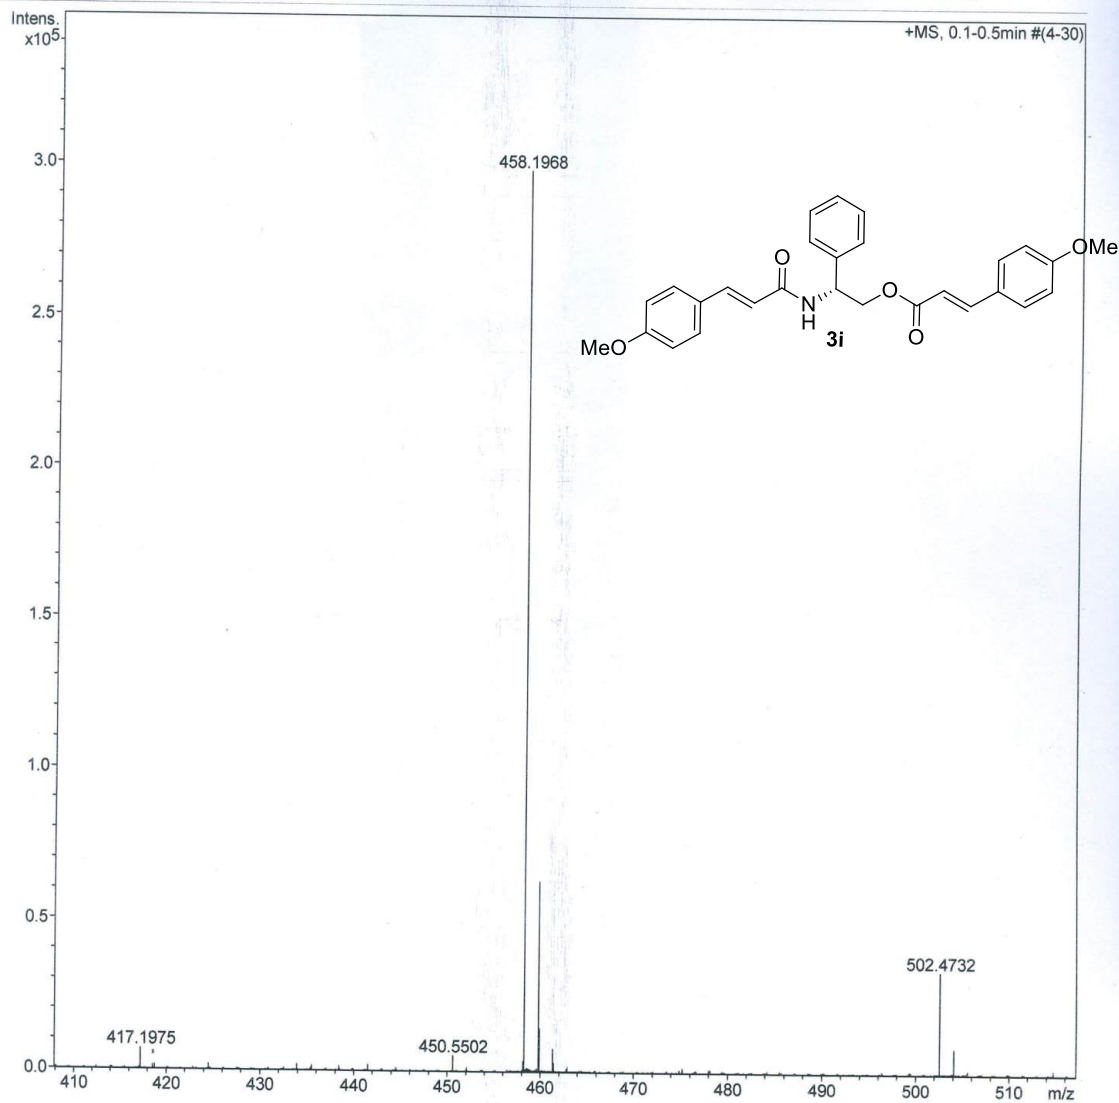

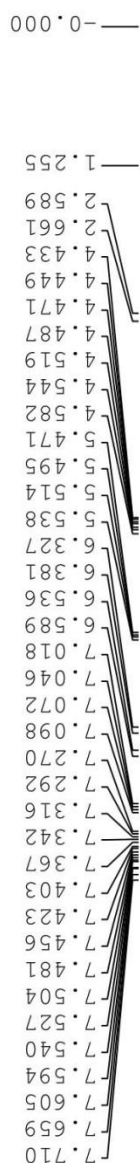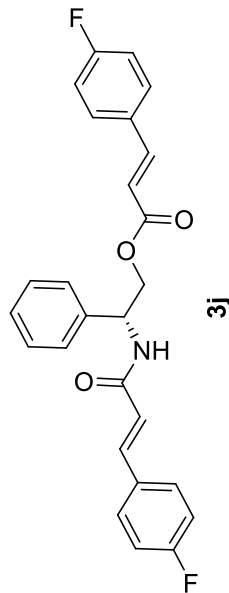

Current Data Parameters  
 NAME H2552D7  
 EXPNO 1  
 PROCNO 1

F2 - Acquisition Parameters  
 Date\_ 20180904  
 Time 10.50  
 INSTRUM spect  
 PROBHD 5 mm BBO BB-1H  
 PULPROG zg30  
 TD 65536  
 SOLVENT CDCl3  
 NS 16  
 DS 2  
 SWH 6009.615 Hz  
 FIDRES 0.091899 Hz  
 AQ 5.4525952 sec  
 RG 203  
 DW 83.200 usec  
 DE 6.50 usec  
 TE 298.0 K  
 D1 1.00000000 sec  
 ID0 1

===== CHANNEL f1 =====  
 SFO1 300.1325511 MHz  
 NUC1 1H  
 P1 13.00 usec  
 PLW1 10.69999981 W

F2 - Processing parameters  
 SI 65536  
 SF 300.1299641 MHz  
 WDW EM  
 SSB 0  
 LB 0  
 GB 0  
 PC 1.00

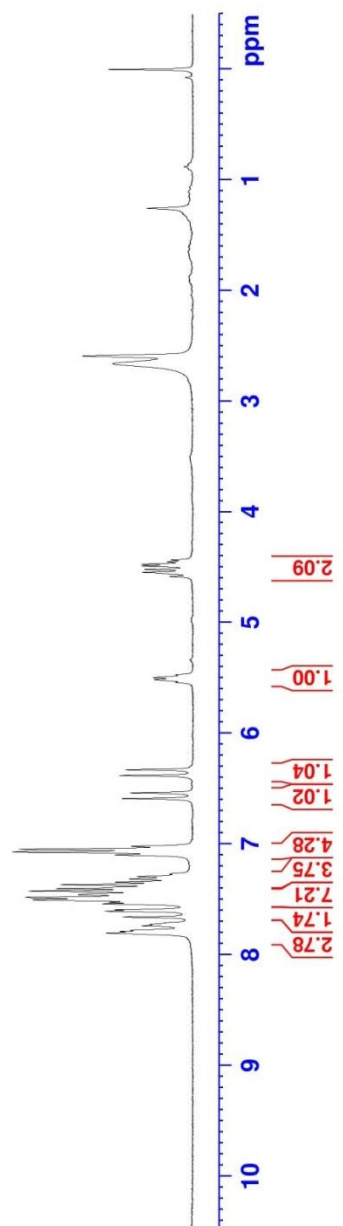

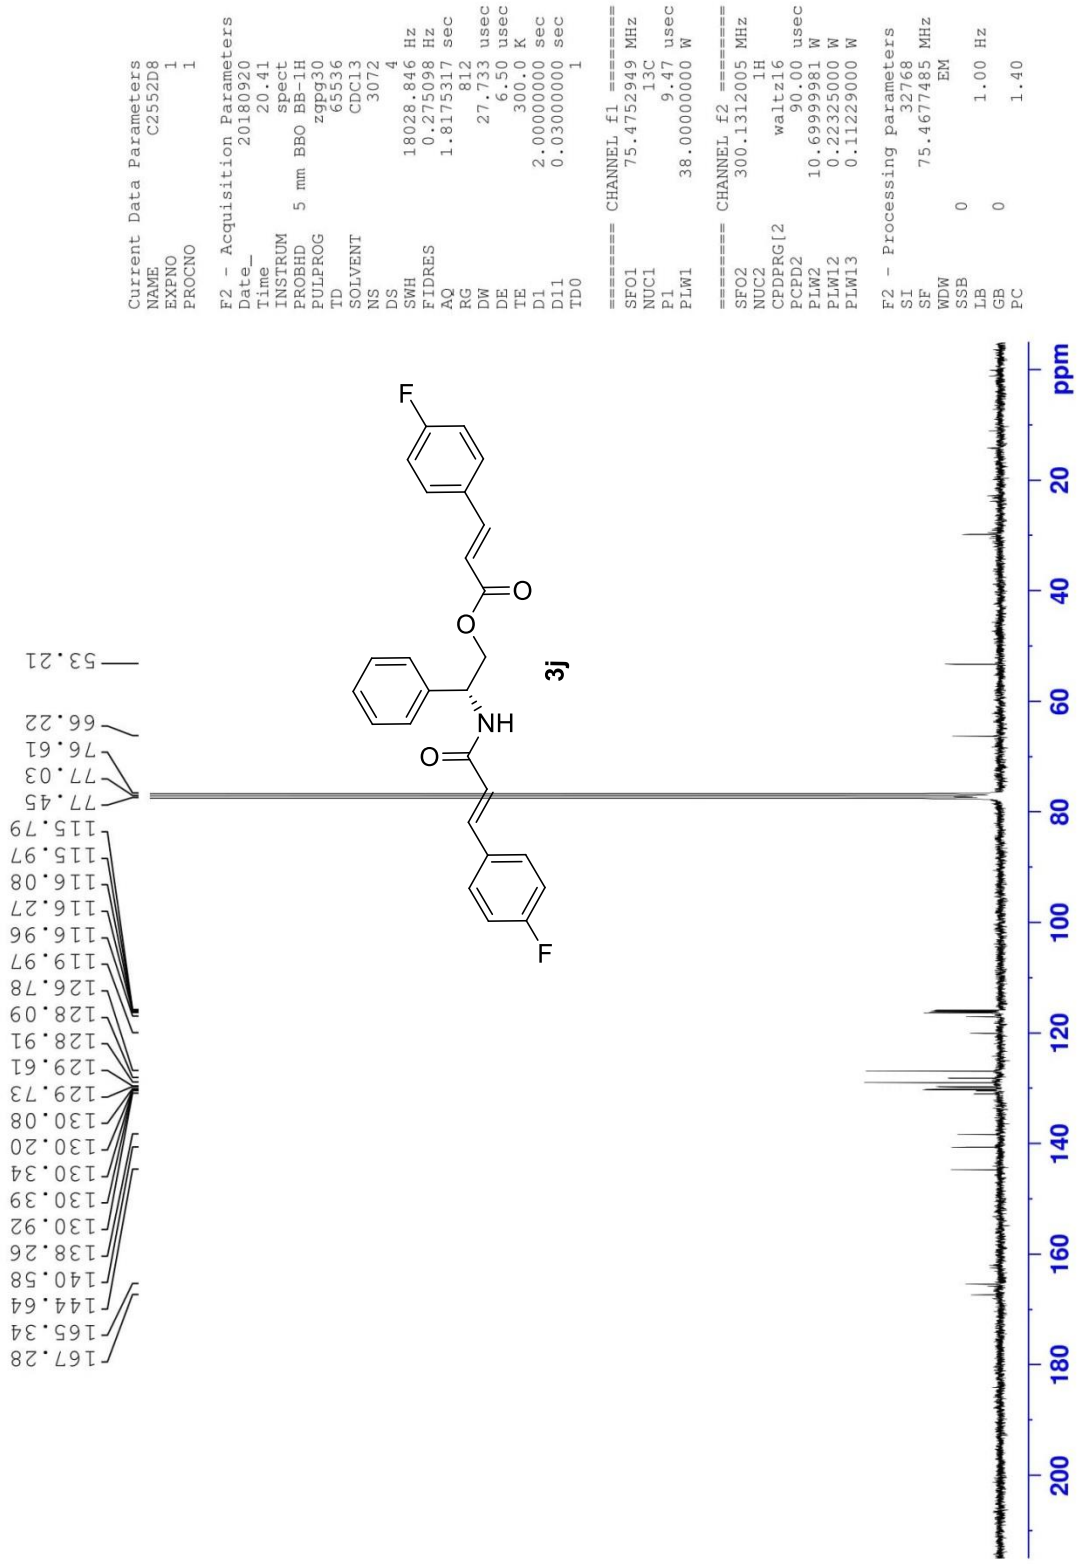

# UOH -SCHOOL OF CHEMISTRY -HRMS

## Analysis Info

Analysis Name D:\Data\2018\PROF MP\DEC\6.d  
 Method tune\_low.m  
 Sample Name 6  
 Comment

Acquisition Date 12/11/2018 4:25:57 PM

Operator UOH-Chemistry  
 Instrument maXis 10138

## Acquisition Parameter

|             |            |                       |           |                  |           |
|-------------|------------|-----------------------|-----------|------------------|-----------|
| Source Type | ESI        | Ion Polarity          | Positive  | Set Nebulizer    | 0.4 Bar   |
| Focus       | Not active | Set Capillary         | 3800 V    | Set Dry Heater   | 200 °C    |
| Scan Begin  | 50 m/z     | Set End Plate Offset  | -500 V    | Set Dry Gas      | 6.0 l/min |
| Scan End    | 1800 m/z   | Set Collision Cell RF | 350.0 Vpp | Set Divert Valve | Waste     |

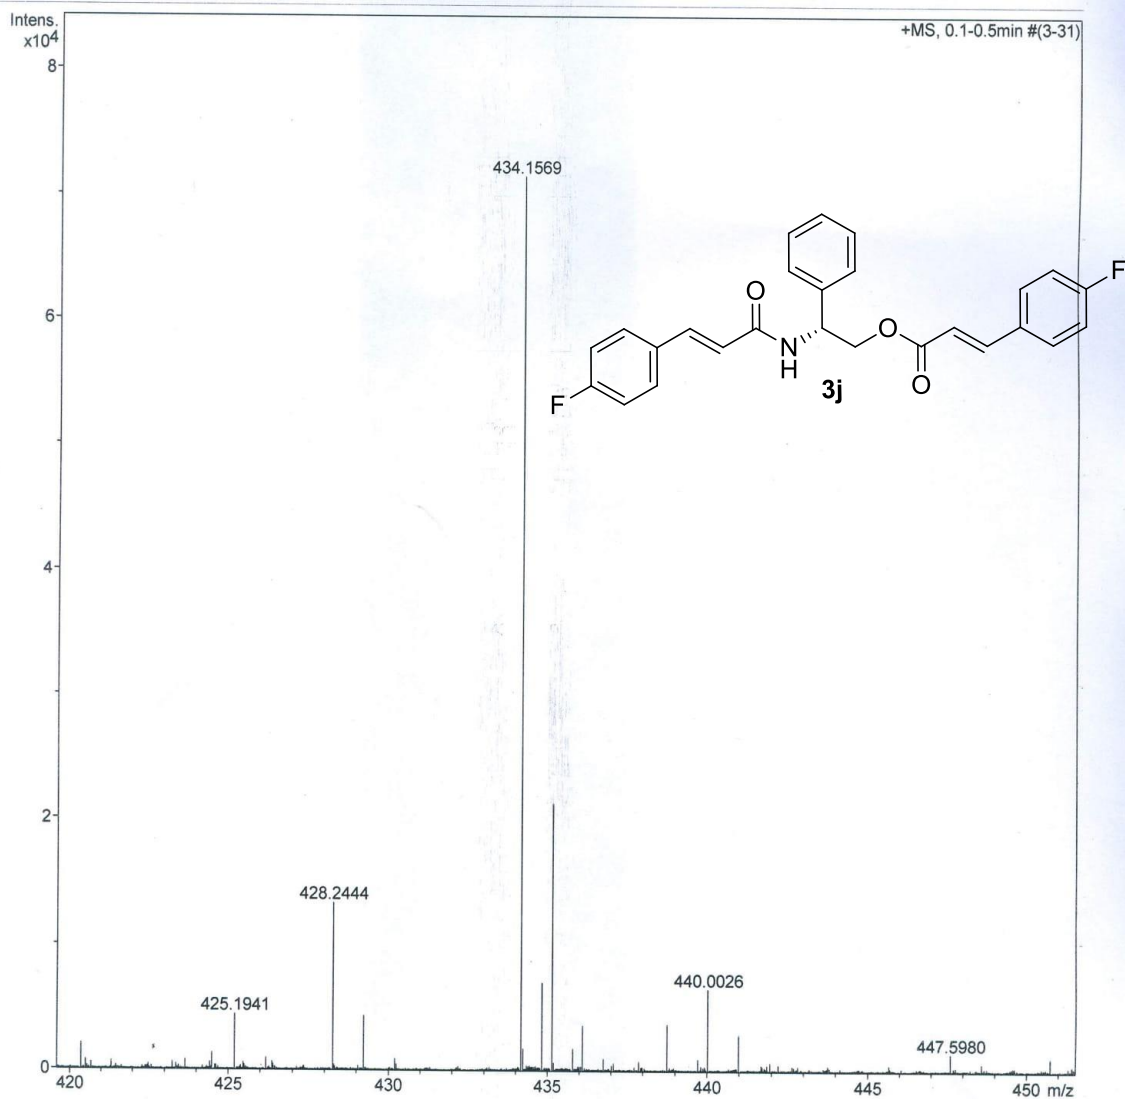

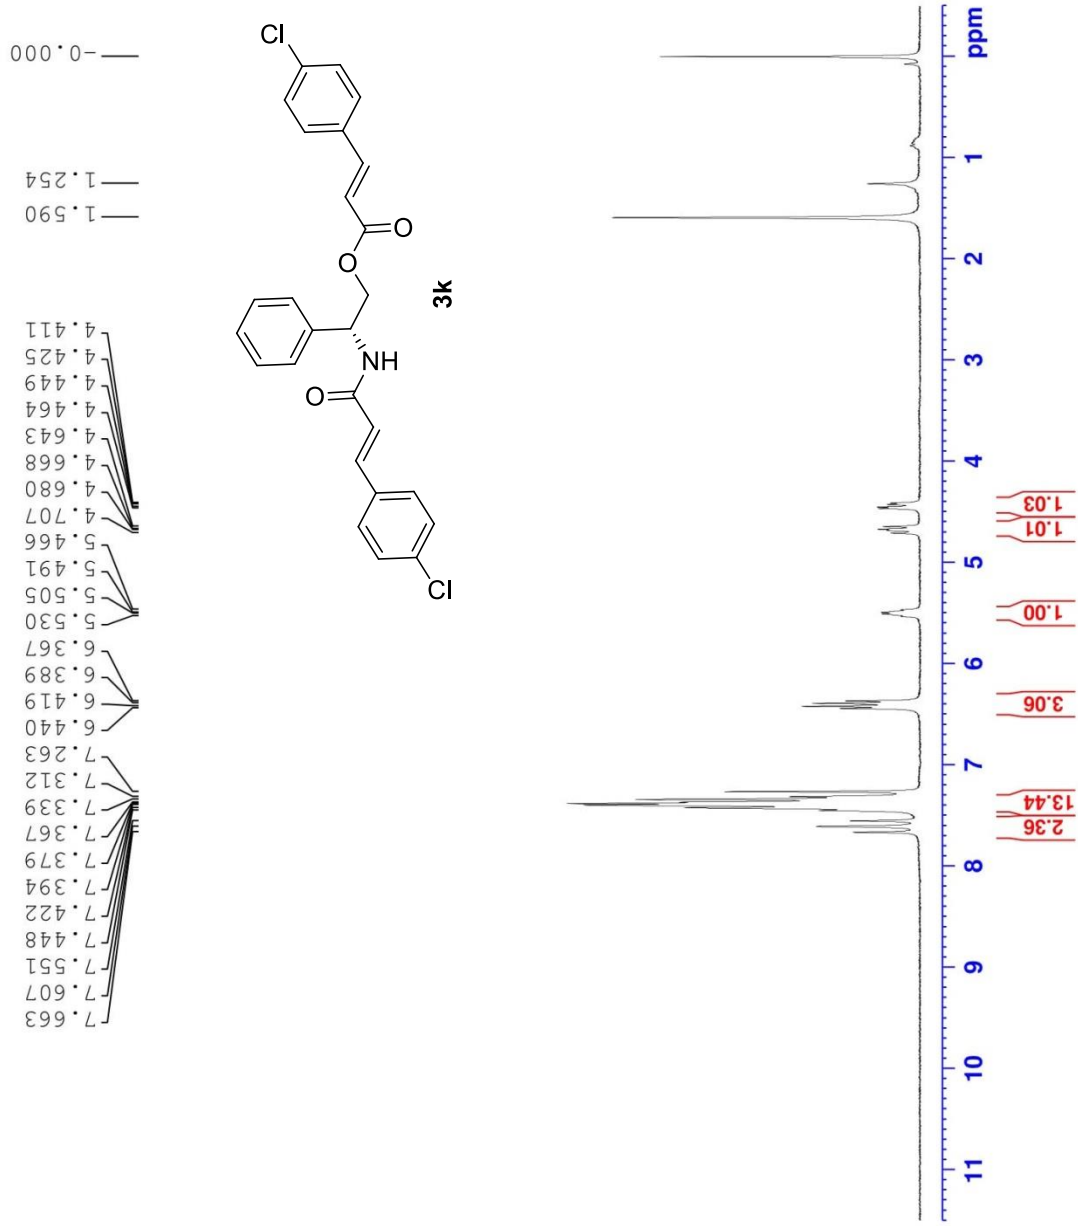

Current Data Parameters  
NAME H2552D12  
EXPNO 1  
PROCNO 1

F2 - Acquisition Parameters  
Date\_ 20180910  
Time 17.12  
INSTRUM spect  
PROBHD 5 mm BBO BB-1H  
PULPROG zg30  
TD 65536  
SOLVENT CDCl3  
NS 16  
DS 2  
SWH 6009.615 Hz  
FIDRES 0.091699 Hz  
AQ 5.4525952 sec  
RG 406  
DW 83.200 usec  
DE 6.50 usec  
TE 298.0 K  
D1 1.00000000 sec  
TD0 1

===== CHANNEL f1 =====  
SFO1 300.1318534 MHz  
NUC1 1H  
P1 13.00 usec  
PLW1 10.69999981 W

F2 - Processing parameters  
SI 65536  
SF 300.1300065 MHz  
WDW EM  
SSB 0  
LB 0.30 Hz  
GB 0  
PC 1.00

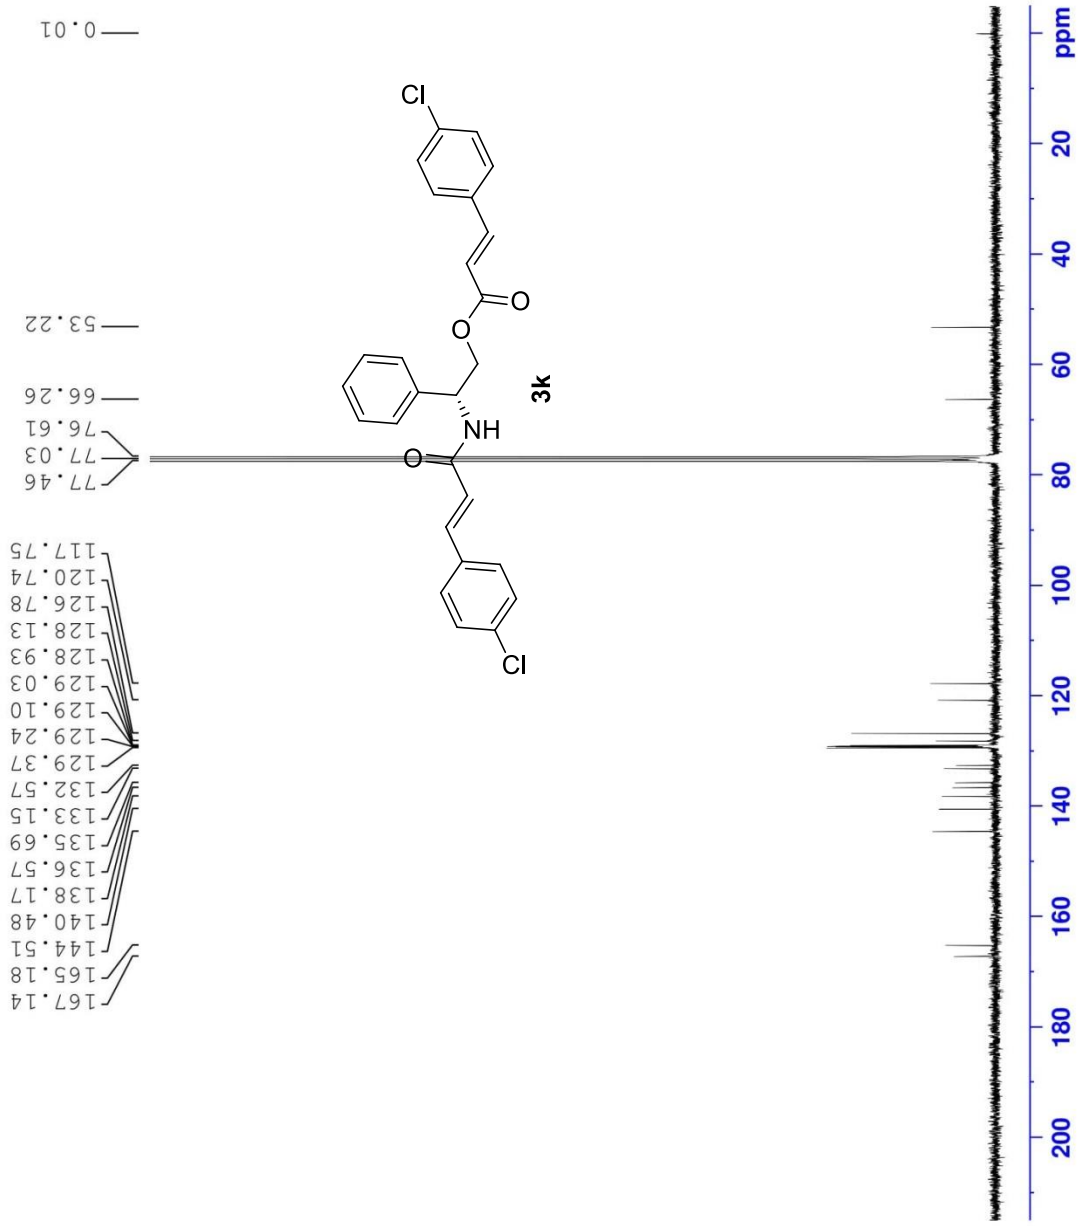

```

Current Data Parameters
NAME      C2552D6
EXPNO     1
PROCNO    1

F2 - Acquisition Parameters
Date_     20180911
Time      15.05
INSTRUM   spect
PROBHD    5 mm BBO BB-1H
PULPROG   zgpg30
TD        65536
SOLVENT   CDCl3
NS         2048
DS         4
SWH        18028.846 Hz
FIDRES     0.275098 Hz
AQ         1.8175317 sec
RG         812
DE         27.733 usec
TE         300.0 K
D1         2.00000000 sec
D11        0.03000000 sec
TD0        1

===== CHANNEL f1 =====
SFO1      75.4752949 MHz
NUC1       13C
P1         9.47 usec
PLW1      38.00000000 W

===== CHANNEL f2 =====
SFO2      300.1312005 MHz
NUC2       1H
CPDPRG[2] waltz16
PCPD2     90.00 usec
PLW2      10.69999981 W
PLW12     0.22325000 W
PLW13     0.11229000 W

F2 - Processing parameters
SI         32768
SF         75.4677485 MHz
WDW        EM
SSB        0
LB         1.00 Hz
GB         0
PC         1.40

```

# UOH -SCHOOL OF CHEMISTRY -HRMS

## Analysis Info

Analysis Name D:\Data\2018\PROF MP\DEC\4.d  
 Method tune\_low\_PosR.m  
 Sample Name 4--DCM-MEOH  
 Comment

Acquisition Date 12/12/2018 2:07:41 PM

Operator UOH-Chemistry  
 Instrument maXis 10138

## Acquisition Parameter

|             |            |                       |           |                  |           |
|-------------|------------|-----------------------|-----------|------------------|-----------|
| Source Type | ESI        | Ion Polarity          | Positive  | Set Nebulizer    | 0.3 Bar   |
| Focus       | Not active | Set Capillary         | 3800 V    | Set Dry Heater   | 250 °C    |
| Scan Begin  | 100 m/z    | Set End Plate Offset  | -500 V    | Set Dry Gas      | 5.0 l/min |
| Scan End    | 2500 m/z   | Set Collision Cell RF | 350.0 Vpp | Set Divert Valve | Waste     |

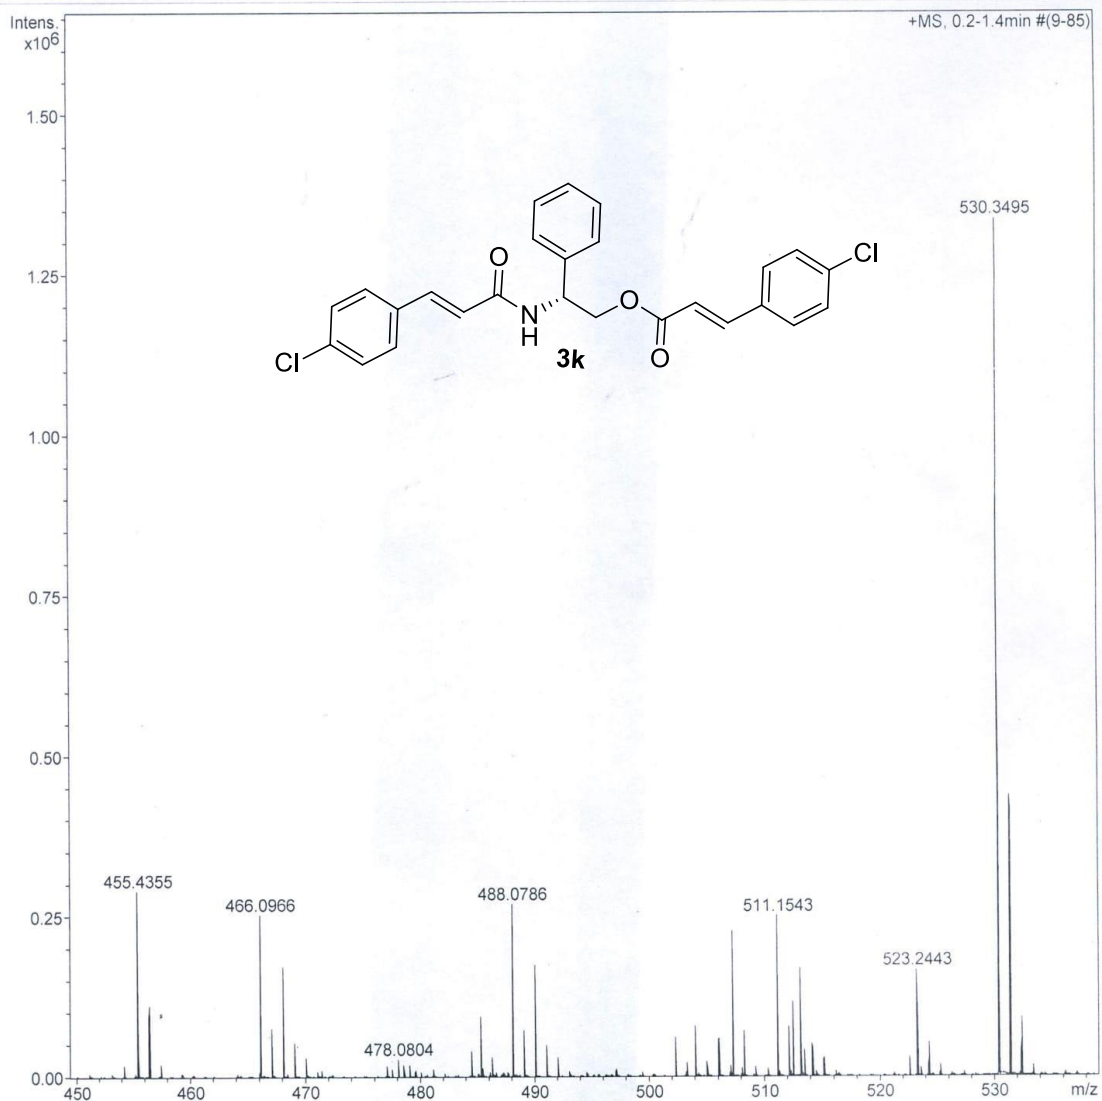

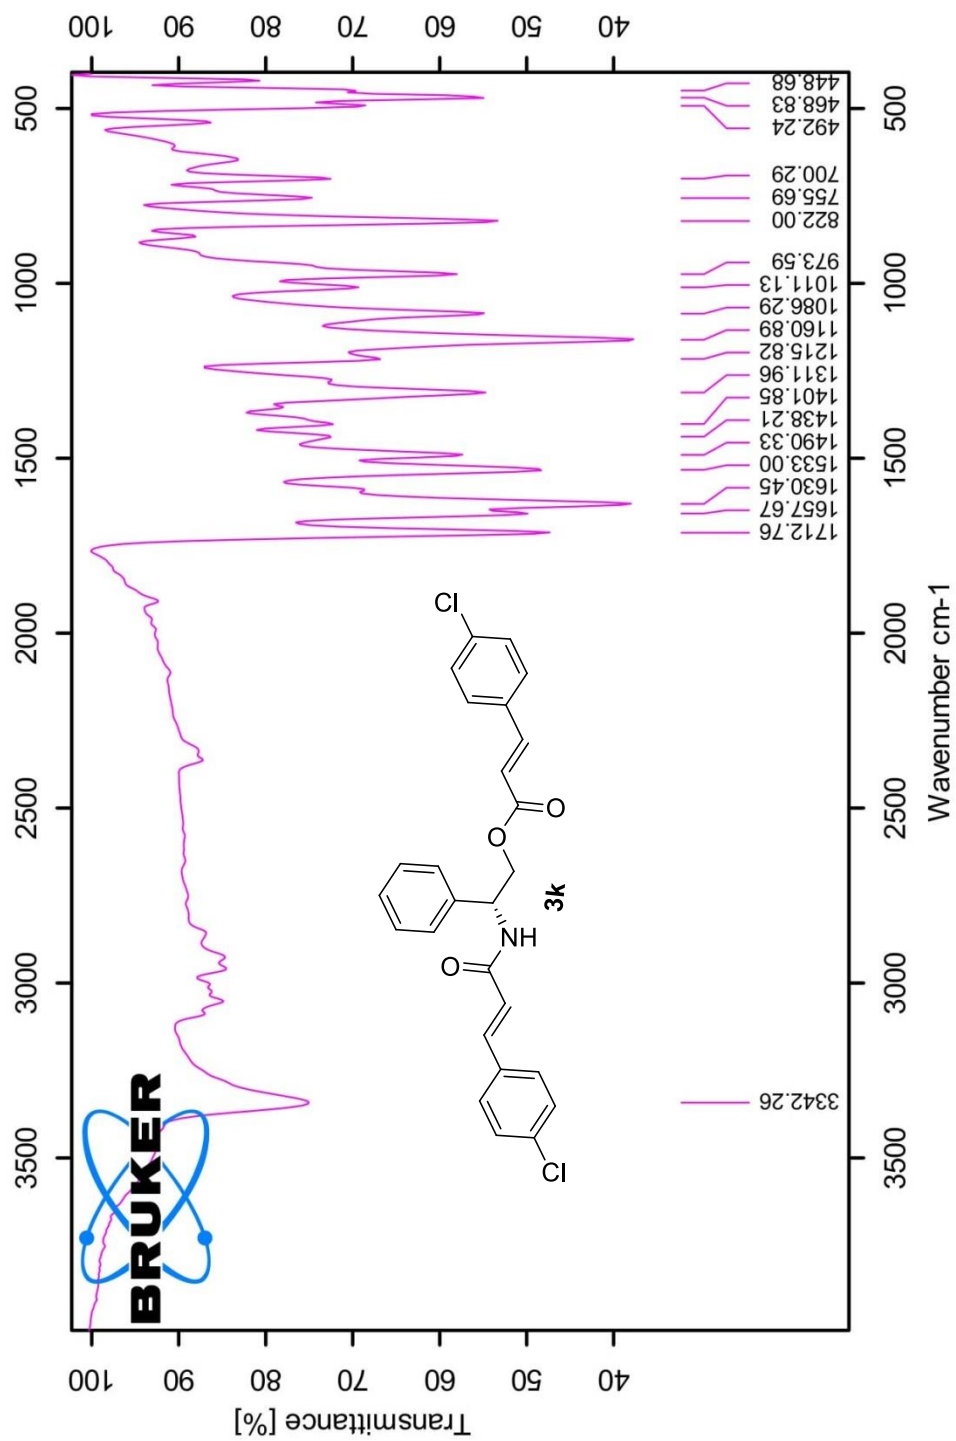

SAMPLE SCANS : 48  
DATE : 11-03-2019  
TIME : 18:47:03

SAMPLE : PVS 2  
TECHNIQUE : Thinfilm  
USER : Default

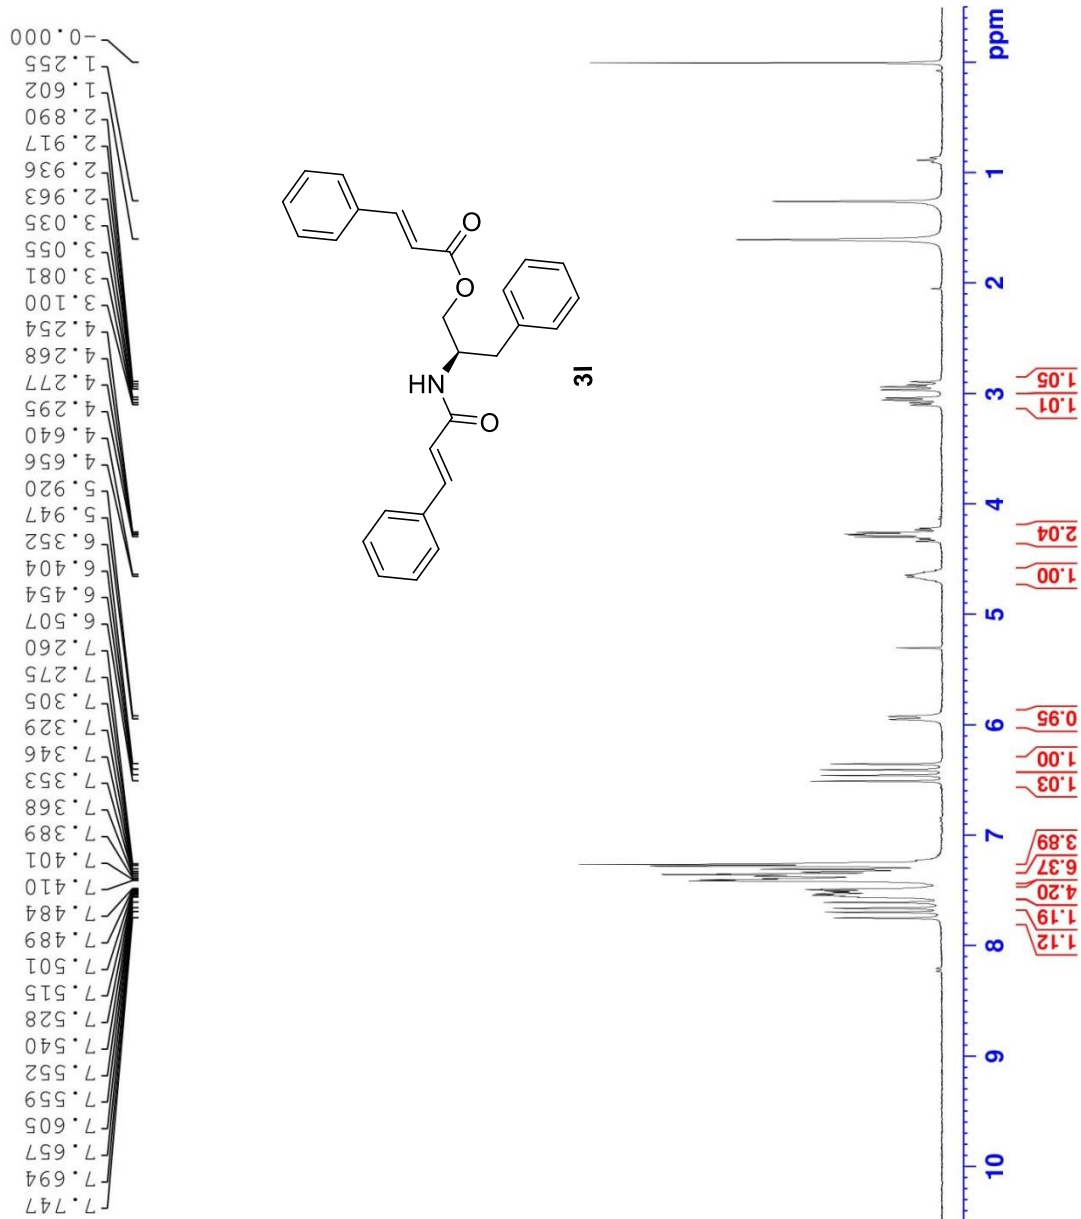

Current Data Parameters  
NAME H2552C17  
EXPNO 1  
PROCNO 1

F2 - Acquisition Parameters  
Date\_ 20180821  
Time 16.35  
INSTRUM spect  
PROBHD 5 mm BBO BB-IH  
PULPROG zg30  
TD 65536  
SOLVENT CDCl3  
NS 16  
DS 2  
SWH 6009.615 Hz  
FIDRES 0.091699 Hz  
AQ 5.4525952 sec  
RG 362  
DW 83.200 usec  
DE 6.50 usec  
TE 298.0 K  
D1 1.00000000 sec  
TD0 1

===== CHANNEL f1 =====  
SFO1 300.1318534 MHz  
NUC1 1H  
P1 13.00 usec  
PLW1 10.6999981 W

F2 - Processing parameters  
SI 65536  
SF 300.1300067 MHz  
WDW EM  
SSB 0  
LB 0  
GB 0  
PC 1.00

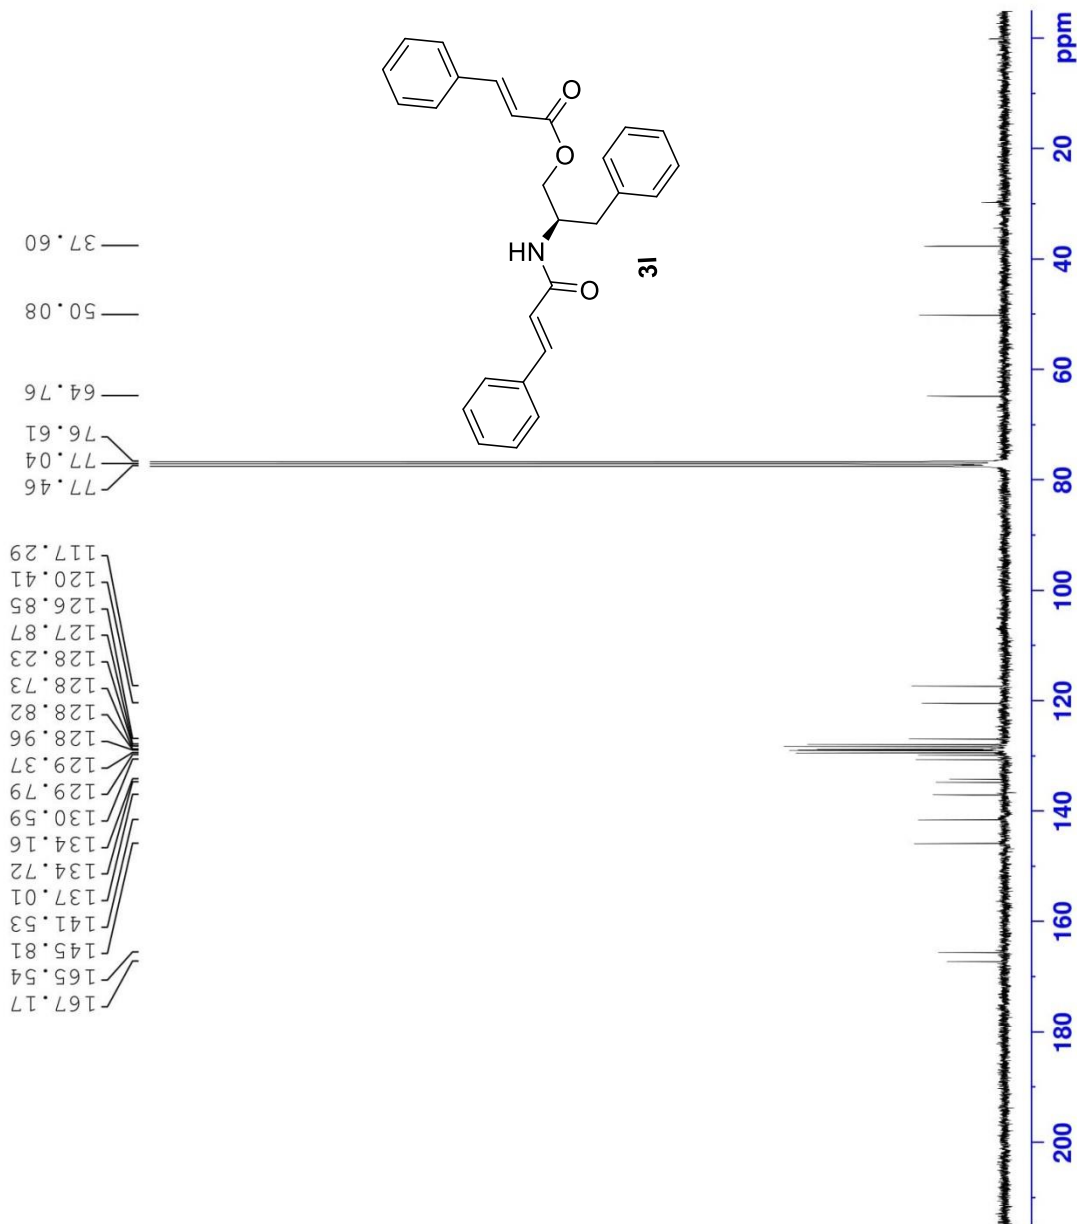

Current Data Parameters  
 NAME C2552C4  
 EXNO 1  
 PROCNO 1

F2 - Acquisition Parameters  
 Date\_ 20180822  
 Time\_ 14.48  
 INSTRUM spect  
 PROBHD 5 mm BBO BB-1H  
 PULPROG zgpg30  
 TD 65536  
 SOLVENT CDCl3  
 NS 2048  
 DS 4  
 SWH 18028.846 Hz  
 FIDRES 0.275098 Hz  
 AQ 1.8175317 sec  
 RG 912  
 DW 27.733 usec  
 DE 6.50 usec  
 TE 300.0 K  
 D1 2.00000000 sec  
 D11 0.03000000 sec  
 TD0 1

===== CHANNEL f1 =====  
 SFO1 75.4752949 MHz  
 NUC1 13C  
 F1 9.47 usec  
 PLW1 38.00000000 W

===== CHANNEL f2 =====  
 SFO2 300.1312005 MHz  
 NUC2 1H  
 CPDPRG[2] waltz16  
 FCPD2 90.00 usec  
 PLW2 10.69999981 W  
 PLW12 0.22325000 W  
 PLW13 0.11229000 W

F2 - Processing parameters  
 SI 32768  
 SF 75.4677485 MHz  
 EM  
 WDW 0  
 SSB 0  
 LB 1.00 Hz  
 GB 0  
 PC 1.40

# UOH -SCHOOL OF CHEMISTRY -HRMS

## Analysis Info

Analysis Name D:\Data\2018\PROF MP\DEC\14.d  
 Method tune\_low.m  
 Sample Name 14  
 Comment

Acquisition Date 12/11/2018 4:58:43 PM

Operator UOH-Chemistry  
 Instrument maXis 10138

## Acquisition Parameter

Source Type ESI  
 Focus Not active  
 Scan Begin 50 m/z  
 Scan End 1800 m/z

Ion Polarity Positive  
 Set Capillary 3800 V  
 Set End Plate Offset -500 V  
 Set Collision Cell RF 350.0 Vpp

Set Nebulizer 0.4 Bar  
 Set Dry Heater 200 °C  
 Set Dry Gas 6.0 l/min  
 Set Divert Valve Waste

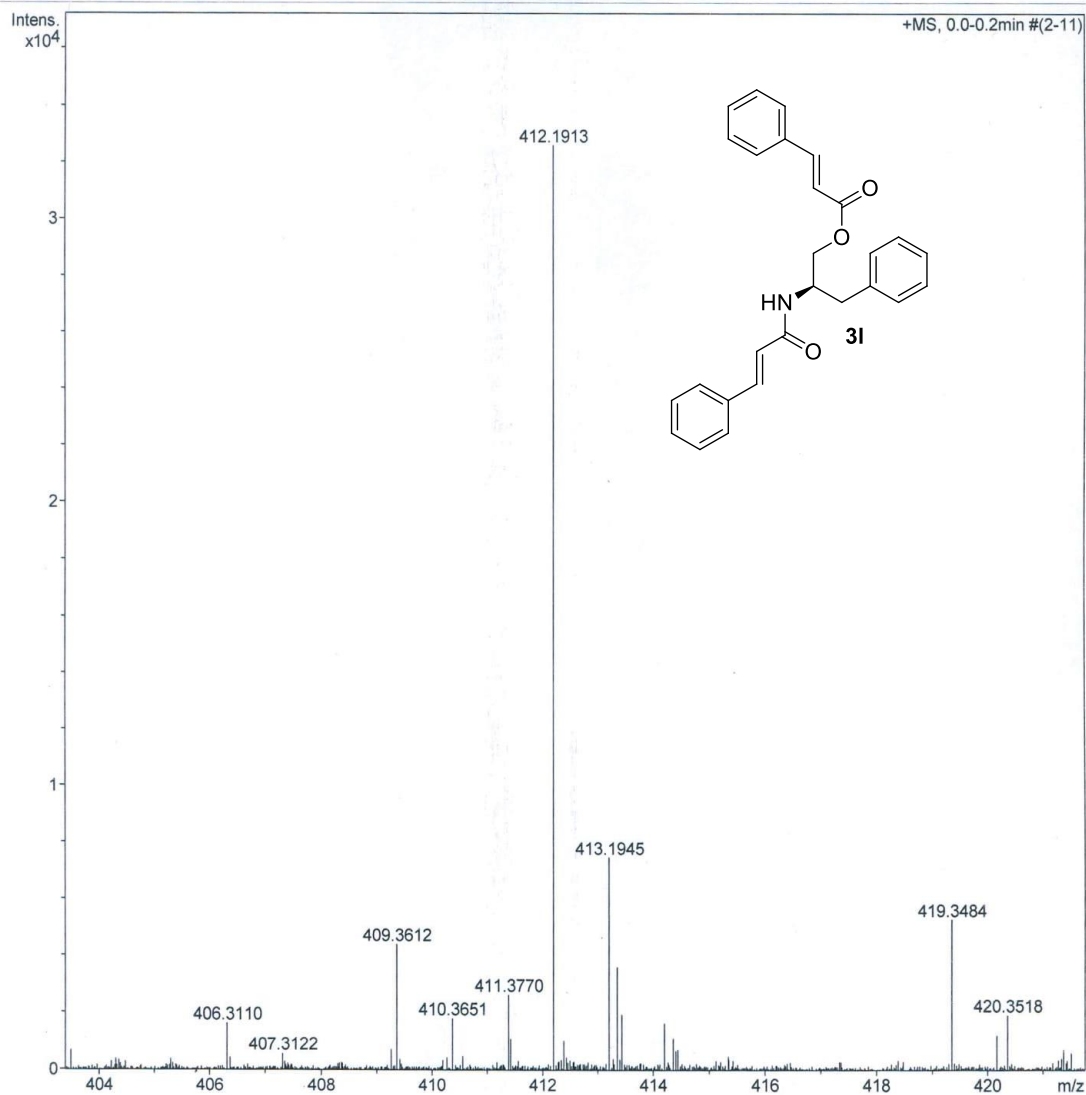

7.647  
7.636  
7.595  
7.569  
7.532  
7.516  
7.474  
7.452  
7.429  
7.396  
7.370  
7.328  
7.306  
7.294  
7.265  
7.251  
7.199  
7.488  
6.435  
6.389  
6.337  
6.000  
5.973  
4.655  
4.640  
4.331  
4.293  
4.274  
4.259  
4.235  
4.220  
3.081  
3.061  
3.036  
3.016  
2.959  
2.932  
2.914  
2.887  
1.672

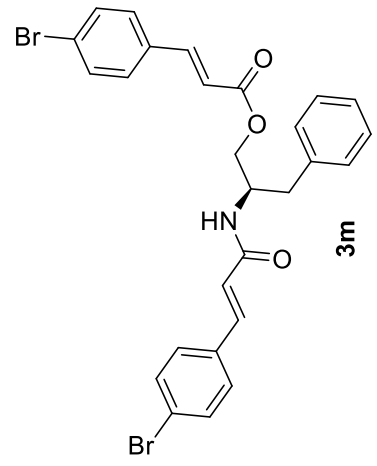

Current Data Parameters  
NAME H2552E16  
EXNO 1  
PROCNO 1

F2 - Acquisition Parameters  
Date\_ 20181008  
Time\_ 17.27  
INSTRUM spect  
PROBHD 5 mm BBO BB-1H  
PULPROG zg30  
TD 65536  
SOLVENT CDCl3  
NS 16  
DS 2  
SWH 6009.615 Hz  
FIDRES 0.091699 Hz  
AQ 5.4525952 sec  
RG 181  
DW 83.200 usec  
DE 6.50 usec  
TE 298.0 K  
D1 1.00000000 sec  
TD0 1

===== CHANNEL f1 =====  
SFO1 300.1318534 MHz  
NUC1 1H  
P1 13.00 usec  
PLW1 10.6999981 W

F2 - Processing parameters  
SI 65536  
SF 300.1300061 MHz  
WDW EM  
SSB 0  
LB 0.30 Hz  
GB 0  
PC 1.00

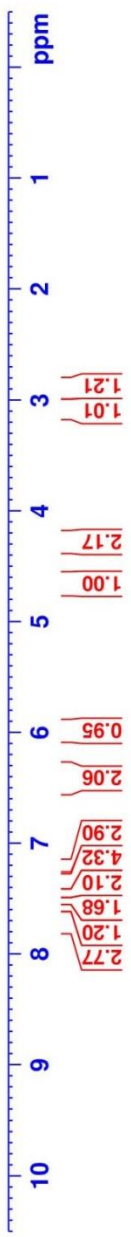

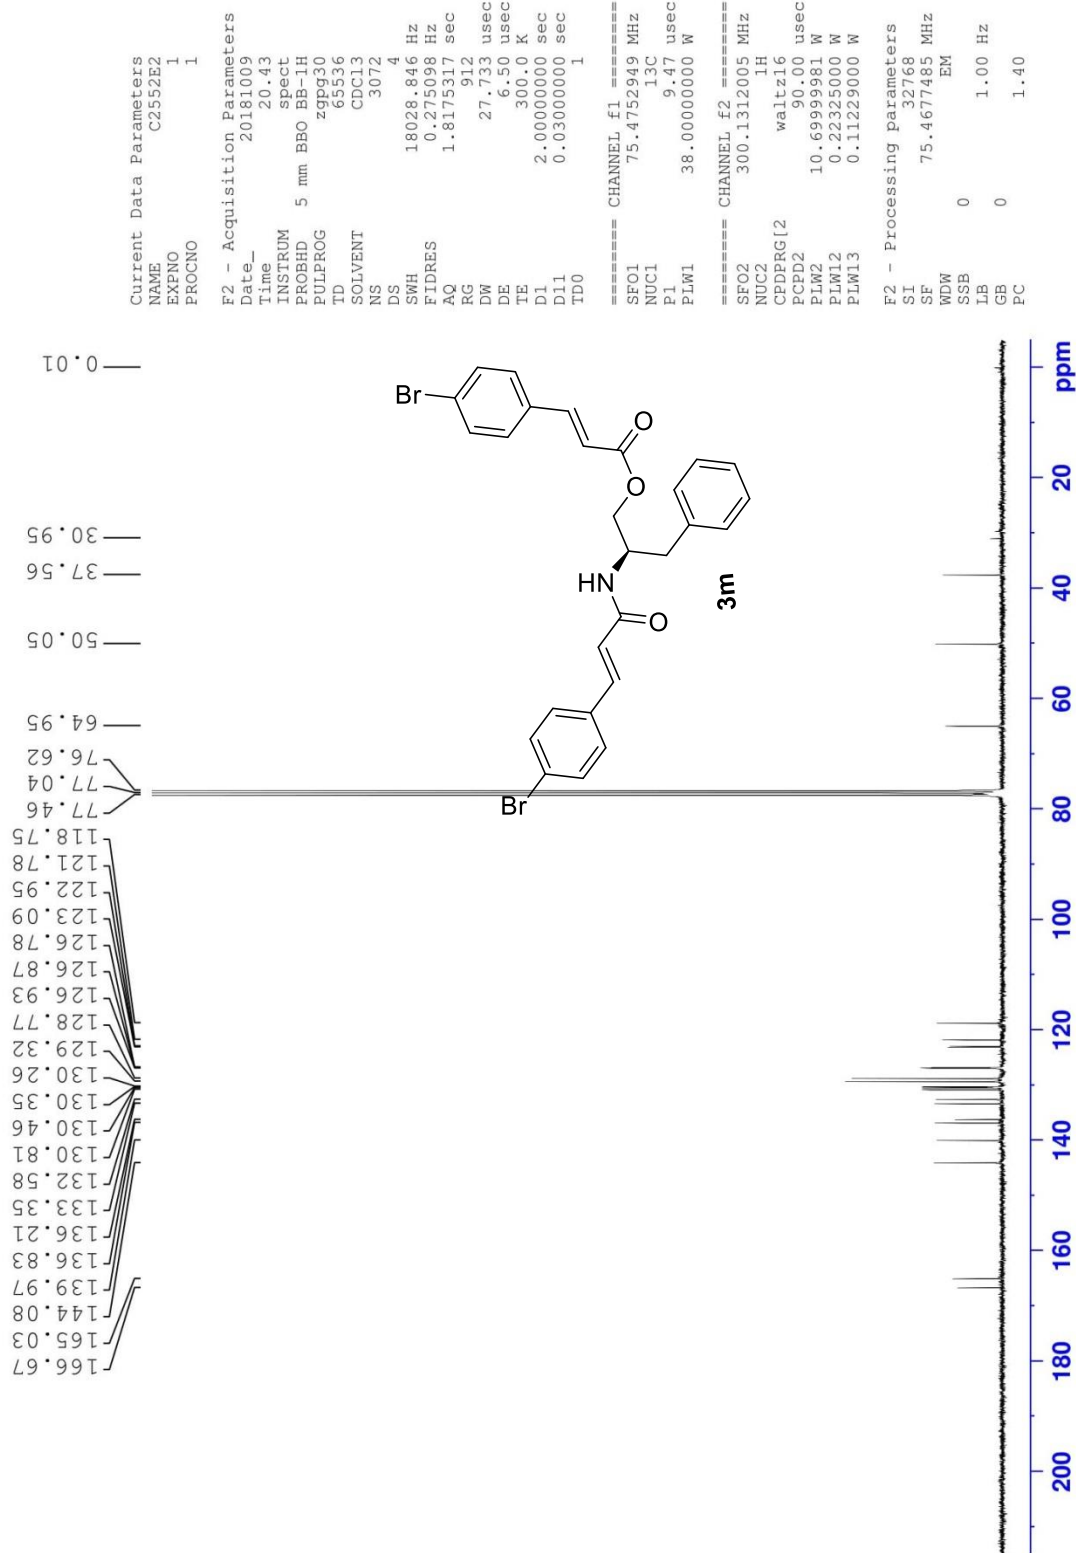

# UOH -SCHOOL OF CHEMISTRY -HRMS

## Analysis Info

Analysis Name D:\Data\2018\PROF MP\DEC\5.d  
 Method tune\_low.m  
 Sample Name 5  
 Comment

Acquisition Date 12/11/2018 3:33:01 PM

Operator UOH-Chemistry  
 Instrument maXis 10138

## Acquisition Parameter

|             |            |                       |           |                  |           |
|-------------|------------|-----------------------|-----------|------------------|-----------|
| Source Type | ESI        | Ion Polarity          | Positive  | Set Nebulizer    | 0.4 Bar   |
| Focus       | Not active | Set Capillary         | 3800 V    | Set Dry Heater   | 200 °C    |
| Scan Begin  | 50 m/z     | Set End Plate Offset  | -500 V    | Set Dry Gas      | 6.0 l/min |
| Scan End    | 1800 m/z   | Set Collision Cell RF | 350.0 Vpp | Set Divert Valve | Waste     |

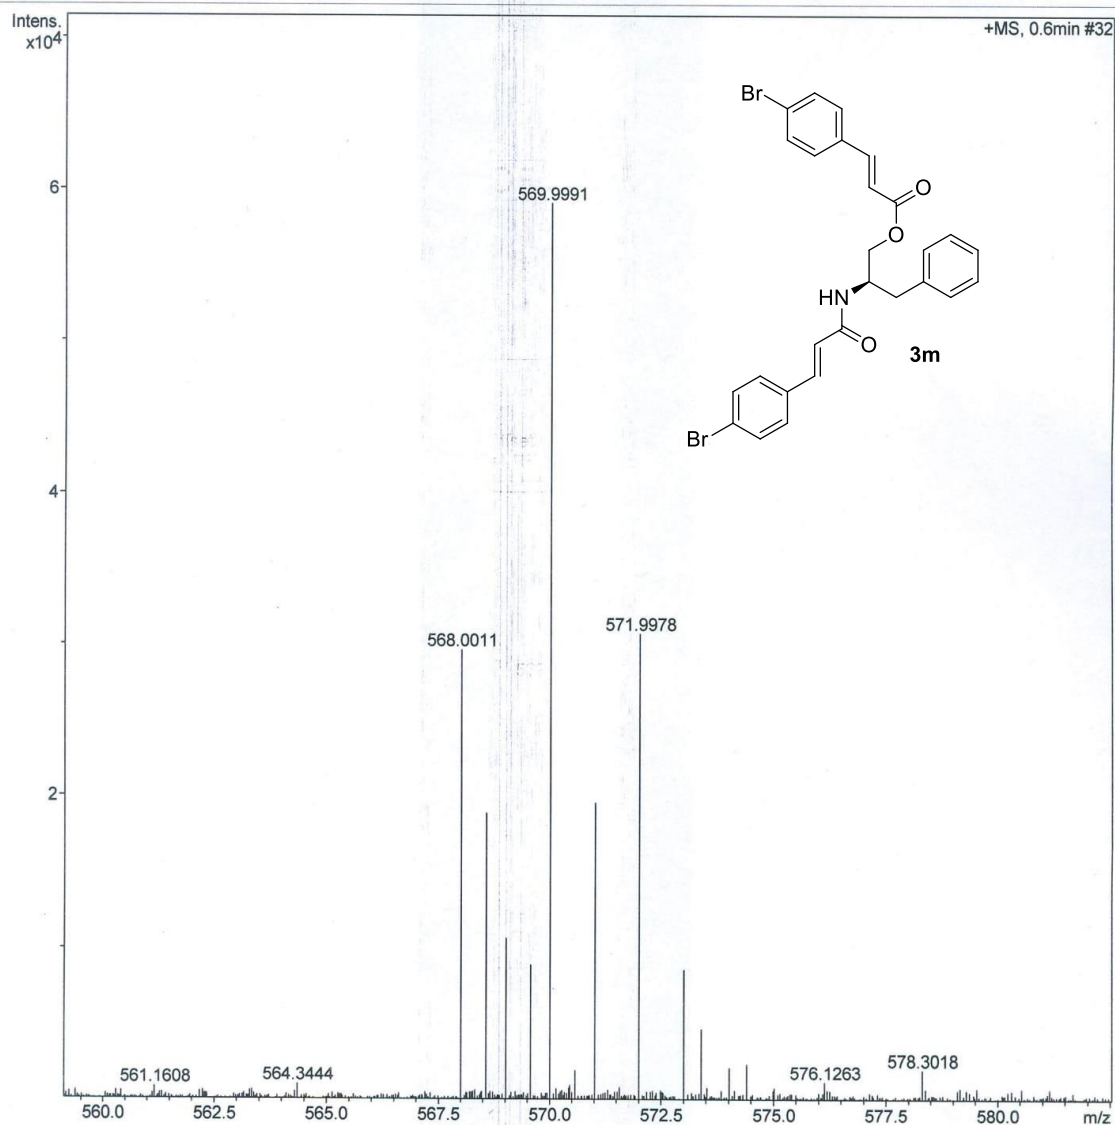

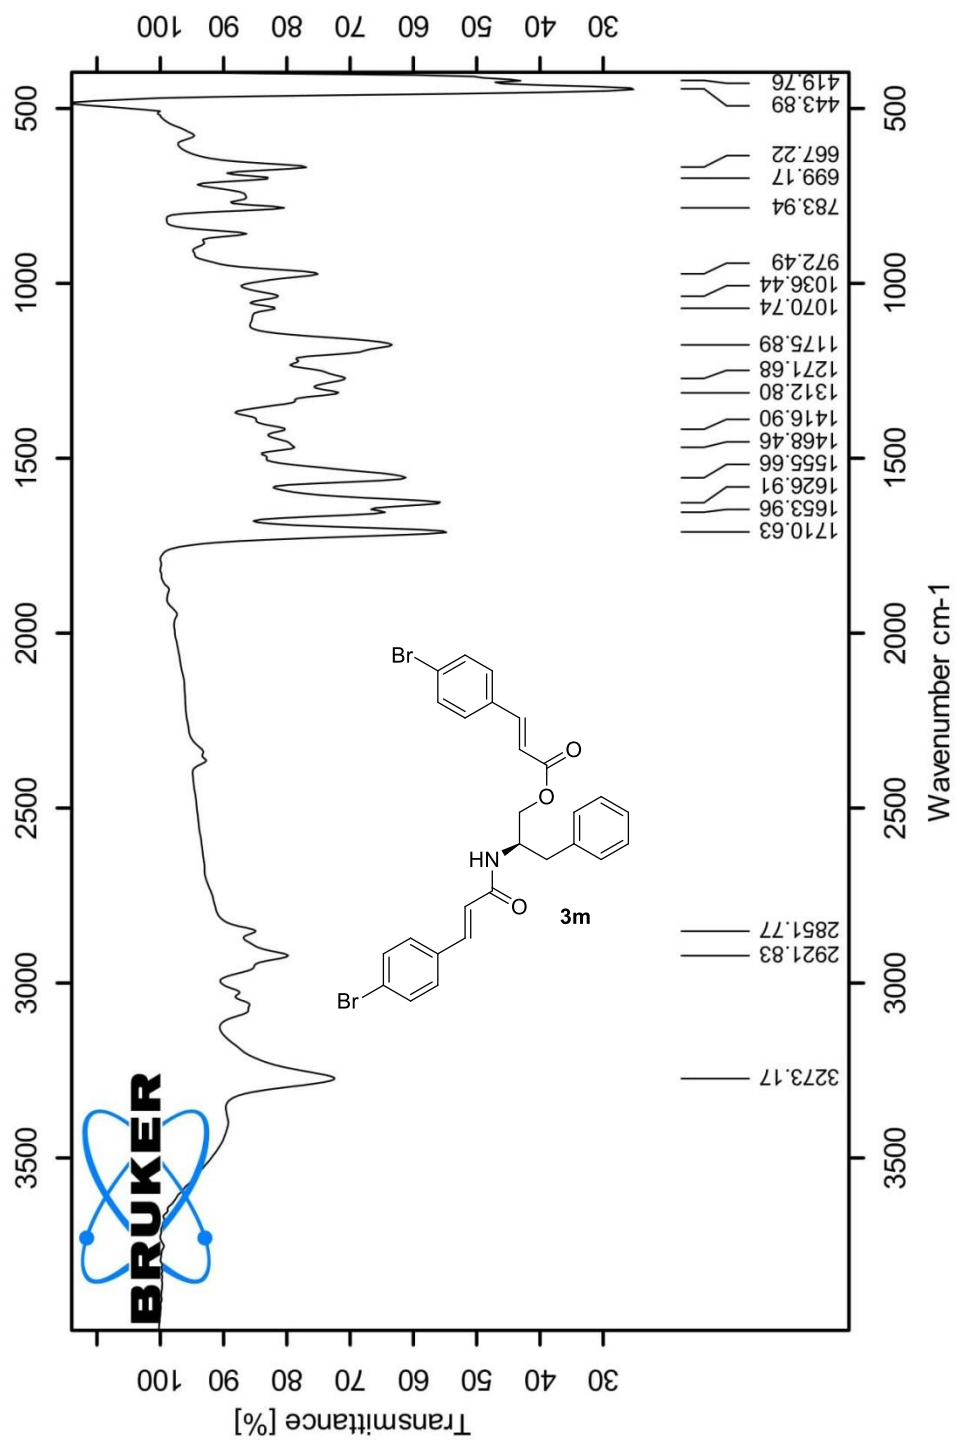

SAMPLE : PVS 6  
TECHNIQUE : Thinfilm  
USER : Default

SAMPLE SCANS : 48  
DATE : 11-03-2019  
TIME : 15:35:54

7.699  
7.646  
7.616  
7.563  
7.550  
7.532  
7.521  
7.503  
7.497  
7.478  
7.468  
7.450  
7.353  
7.327  
7.306  
7.270  
7.264  
7.248  
7.117  
7.088  
7.079  
7.059  
7.050  
7.021  
6.420  
6.367  
6.316  
6.264  
5.941  
5.913  
4.651  
4.636  
4.293  
4.274  
4.262  
4.248  
3.068  
3.041  
3.022  
2.955  
2.928  
2.909  
2.626  
1.626  
1.255  
0.000

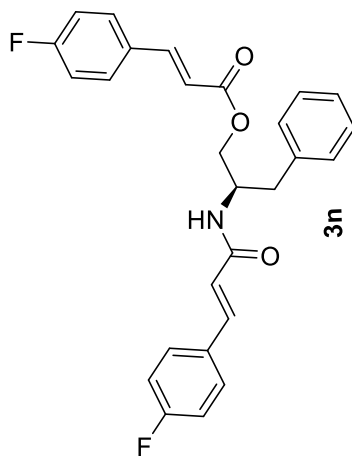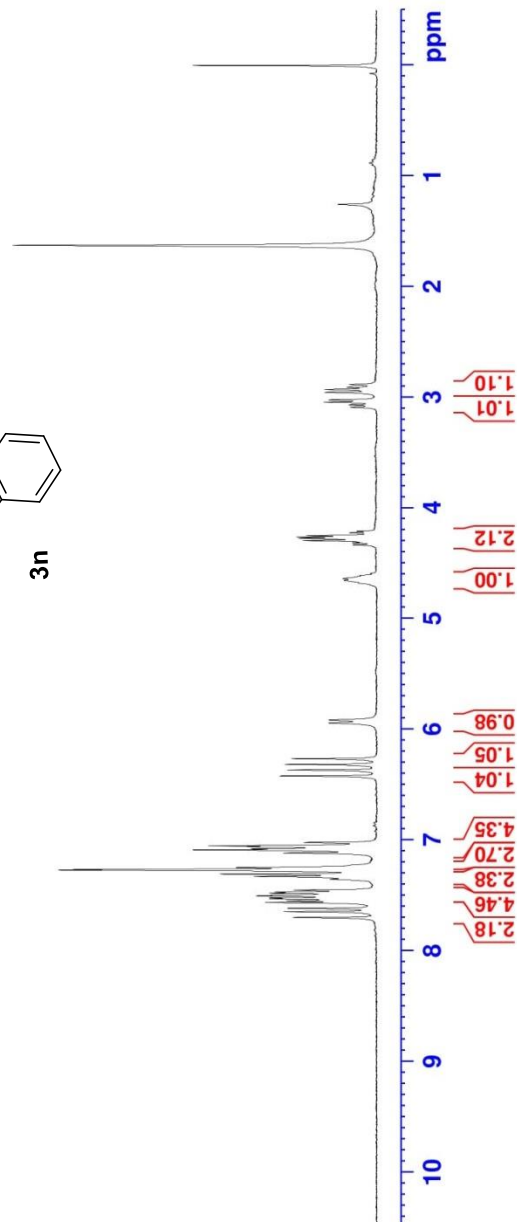

Current Data Parameters  
NAME H2552D8  
EXPNO 1  
PROCNO 1

F2 - Acquisition Parameters  
Date\_ 20180904  
Time 15.46  
INSTRUM spect  
PROBHD 5 mm BBO BB-1H  
PULPROG zg30  
TD 65536  
SOLVENT CDCl3  
NS 16  
DS 2  
SWH 6009.615 Hz  
FIDRES 0.091699 Hz  
AQ 5.4525952 sec  
RG 362  
DW 83.200 usec  
DE 6.50 usec  
TE 298.0 K  
D1 1.00000000 sec  
TD0 1

===== CHANNEL f1 =====  
SFO1 300.1318534 MHz  
NUC1 1H  
P1 13.00 usec  
PLW1 10.69999981 W

F2 - Processing parameters  
SI 65536  
SF 300.1300056 MHz  
WDW EM  
SSB 0  
LB 0  
GB 0  
PC 1.00

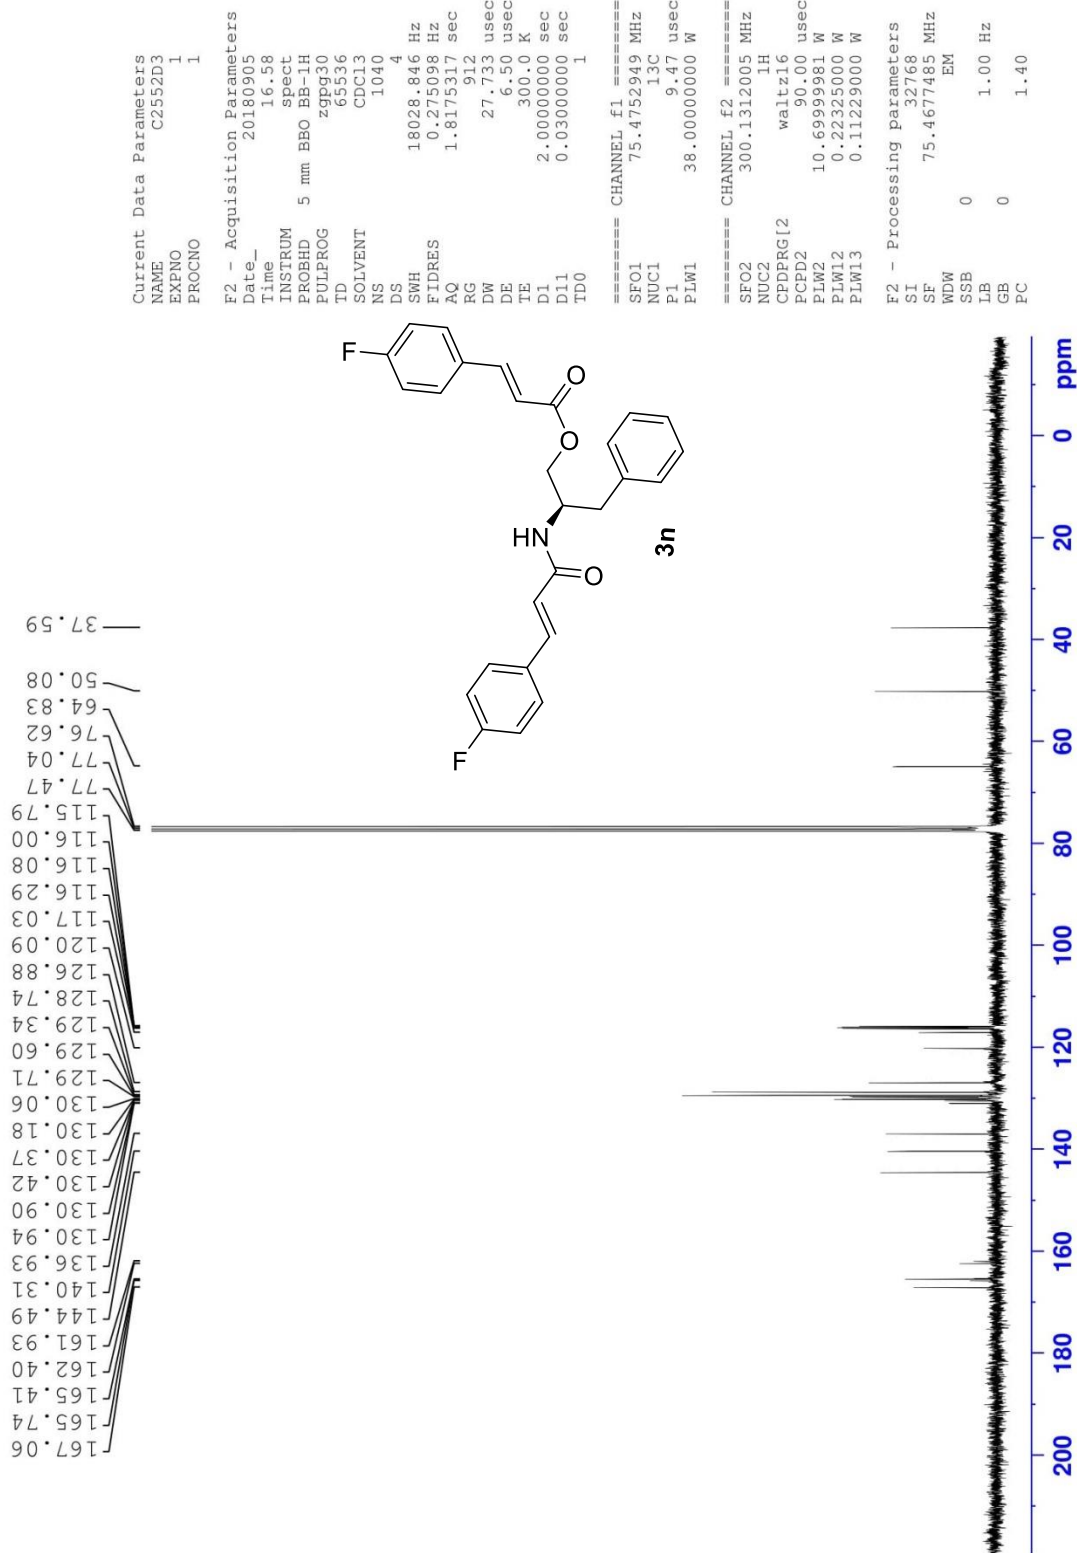

# UOH -SCHOOL OF CHEMISTRY -HRMS

## Analysis Info

Analysis Name D:\Data\2018\PROF MP\DEC\8.d  
 Method tune\_low.m  
 Sample Name 8  
 Comment

Acquisition Date 12/11/2018 4:31:21 PM

Operator UOH-Chemistry  
 Instrument maXis 10138

## Acquisition Parameter

Source Type ESI  
 Focus Not active  
 Scan Begin 50 m/z  
 Scan End 1800 m/z

Ion Polarity Positive  
 Set Capillary 3800 V  
 Set End Plate Offset -500 V  
 Set Collision Cell RF 350.0 Vpp

Set Nebulizer 0.4 Bar  
 Set Dry Heater 200 °C  
 Set Dry Gas 6.0 l/min  
 Set Divert Valve Waste

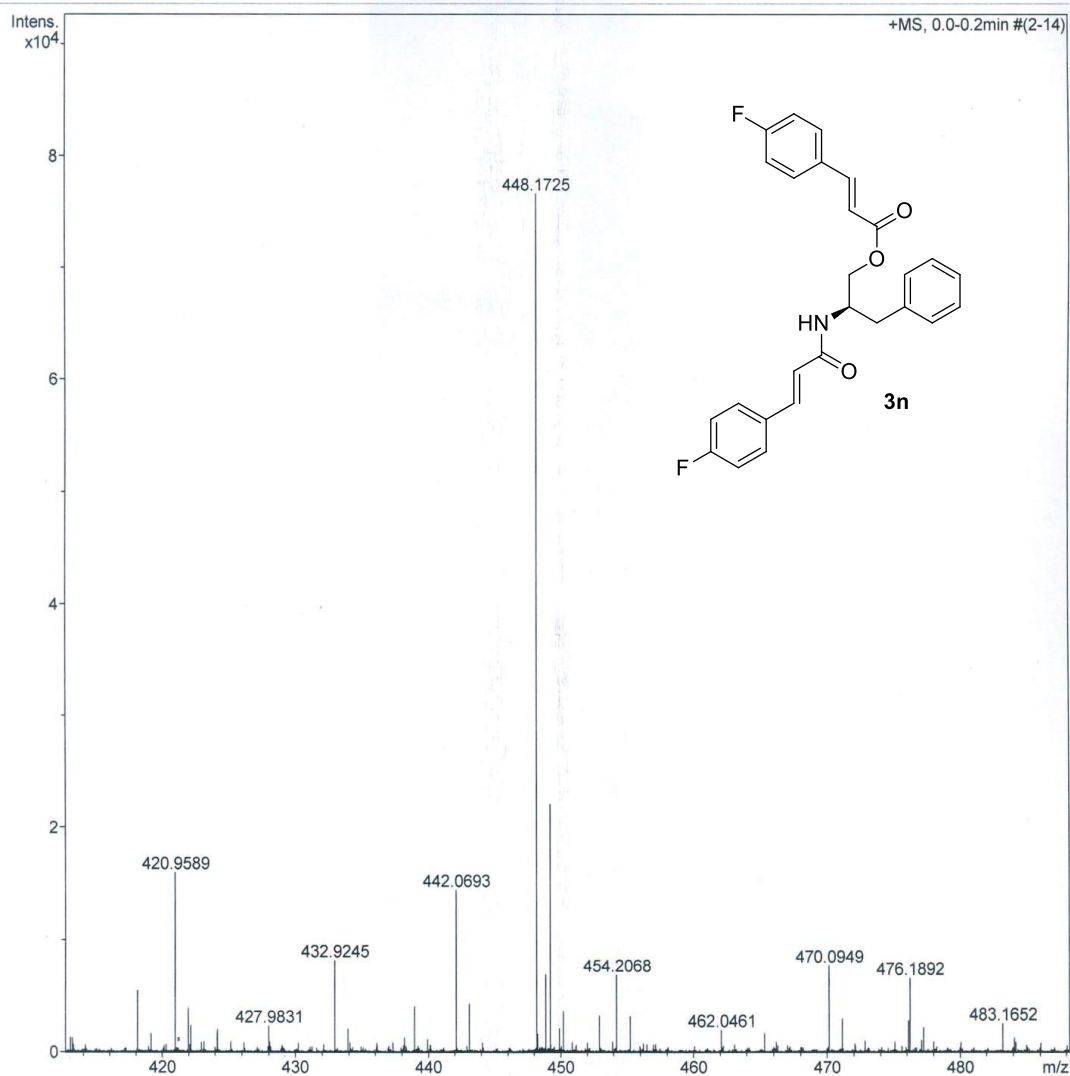





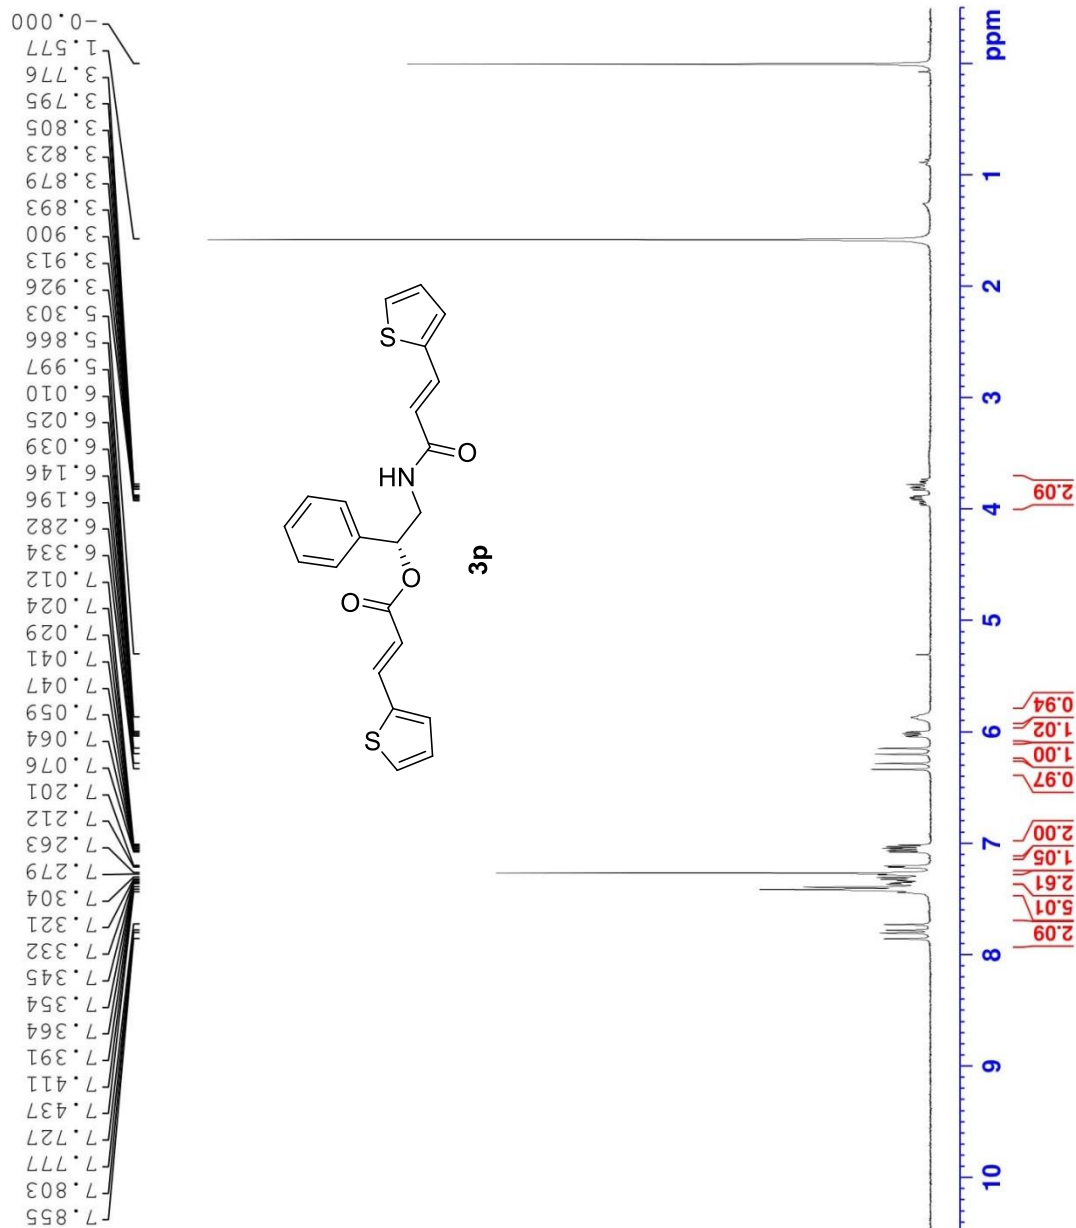

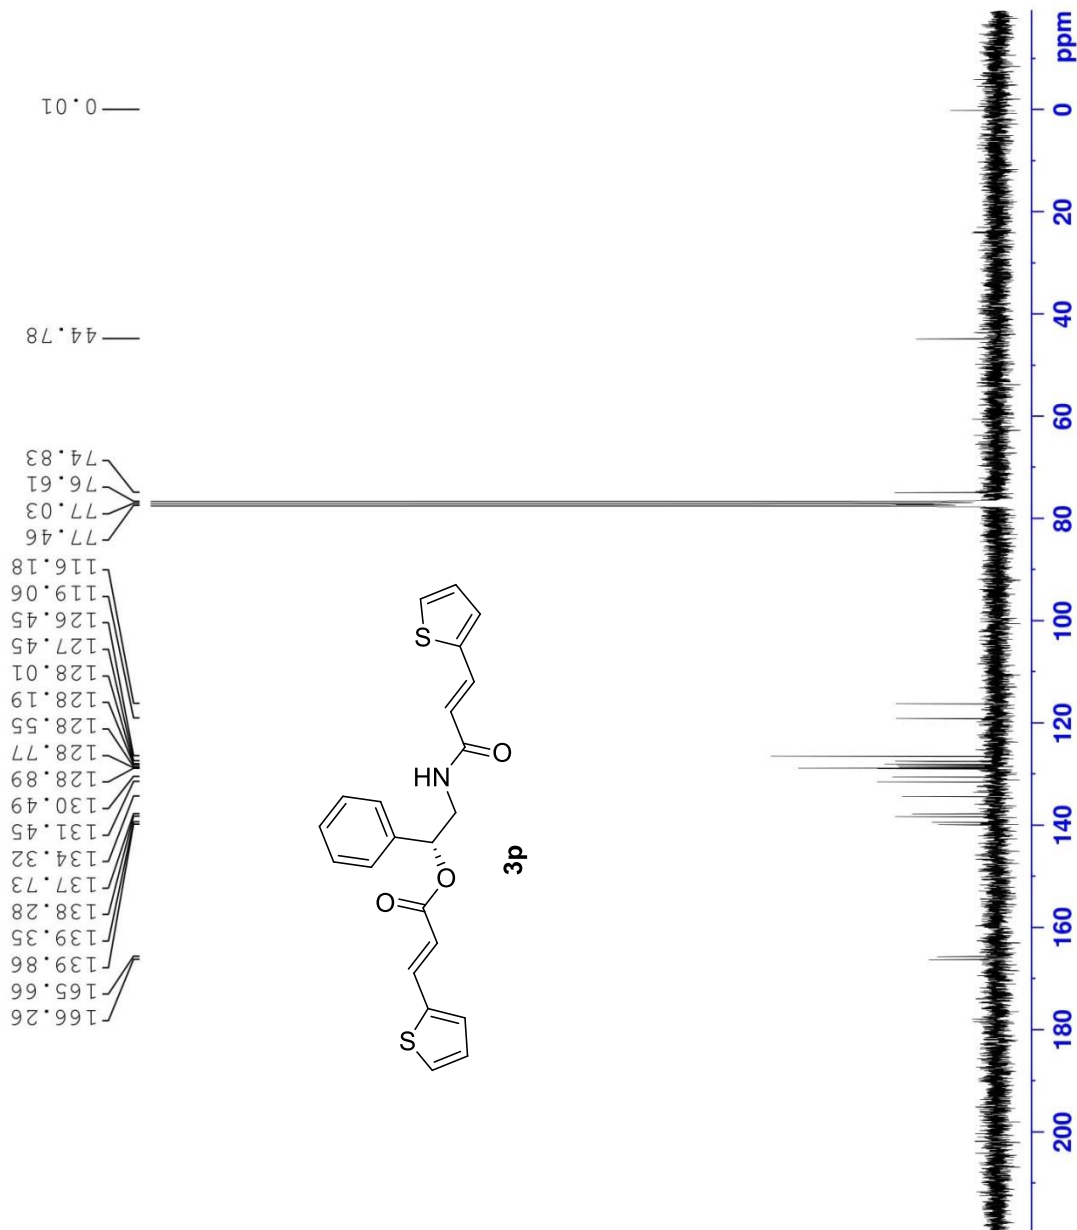

Current Data Parameters  
NAME C2552F10  
EXPNO 1  
PROCNO 1

F2 - Acquisition Parameters  
Date\_ 20190218  
Time 11.00  
INSTRUM spect  
PROBHD 5 mm BBO BB-1H  
PULPROG zgpg30  
TD 65536  
SOLVENT CDCl3  
NS 1024  
DS 4  
SMH 18028.846 Hz  
FIDRES 0.275098 Hz  
AQ 1.8175317 sec  
RG 724  
DW 27.733 usec  
DE 6.50 usec  
TE 300.0 K  
D1 2.0000000 sec  
D11 0.0300000 sec  
TD0 1

===== CHANNEL f1 =====  
SFO1 75.4752949 MHz  
NUC1 13C  
P1 9.47 usec  
PLW1 38.0000000 W

===== CHANNEL f2 =====  
SFO2 300.1312005 MHz  
NUC2 1H  
CPDPRG12 waltz16  
PCPD2 90.00 usec  
PLW2 10.6999981 W  
PLW12 0.2232500 W  
PLW13 0.1122900 W

F2 - Processing parameters  
SI 32768  
SF 75.4677485 MHz  
WDW EM  
SSB 0  
LB 1.00 Hz  
GB 0  
PC 1.40

# Qualitative Compound Identification Report

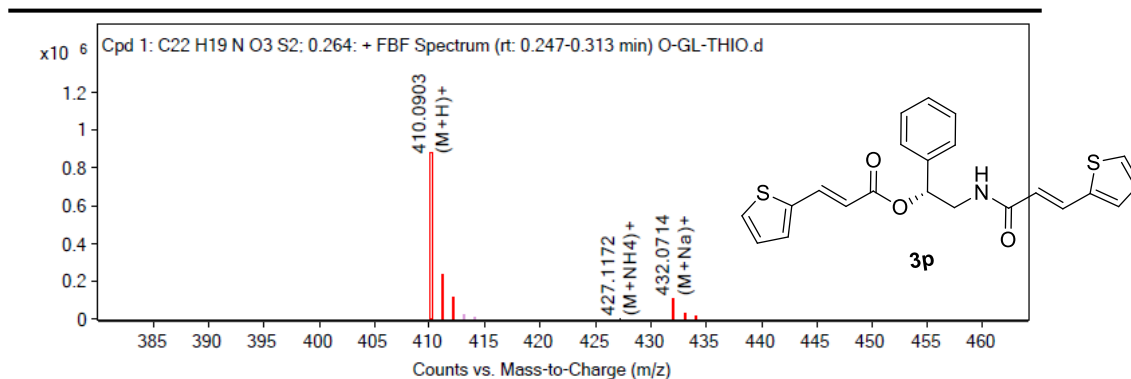

MS Spectrum Peak List

| m/z      | z | Abund     | Ion      |
|----------|---|-----------|----------|
| 410.0903 | 1 | 878525.31 | (M+H)+   |
| 411.0929 | 1 | 191678.69 | (M+H)+   |
| 412.0882 | 1 | 68229.55  | (M+H)+   |
| 427.1172 | 1 | 77.40     | (M+NH4)+ |
| 432.0714 | 1 | 108341.65 | (M+Na)+  |
| 433.0735 | 1 | 22135.11  | (M+Na)+  |
| 434.0680 | 1 | 8466.07   | (M+Na)+  |

MS Spectrum

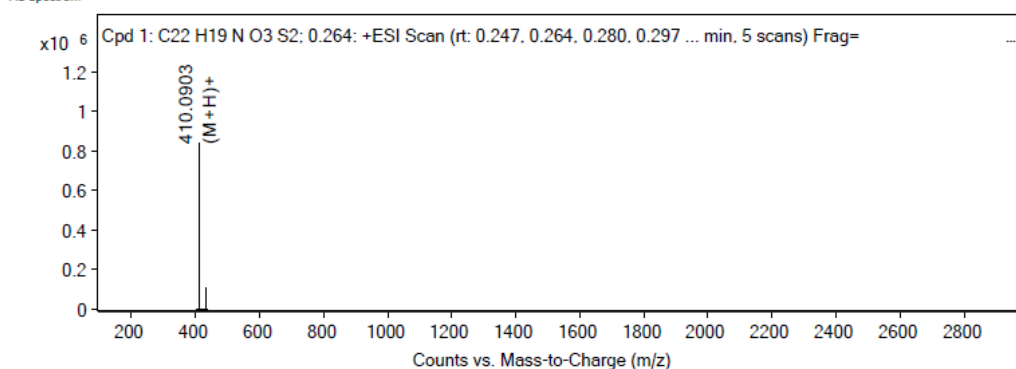

MS Zoomed Spectrum

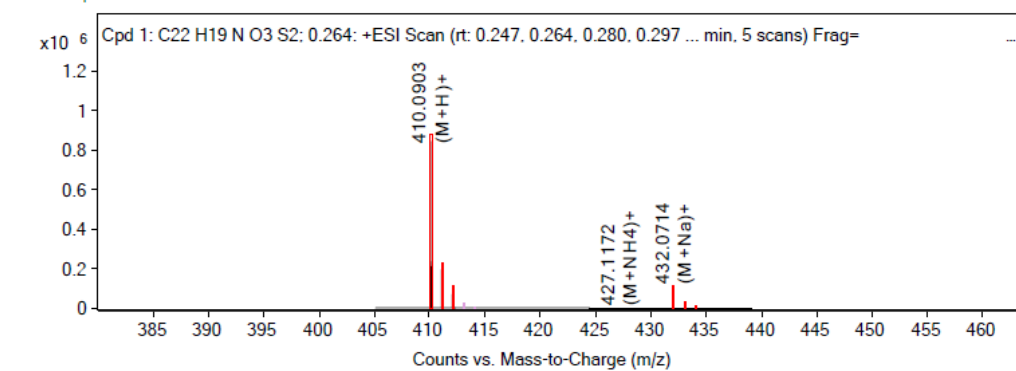

MS Spectrum Peak List

| m/z      | Calc m/z | Diff (ppm) | z | Abund     | Ion    |
|----------|----------|------------|---|-----------|--------|
| 410.0902 | 410.0879 | -5.66      |   | 878433.87 |        |
| 410.0903 | 410.0879 | -5.71      | 1 |           | (M+H)+ |

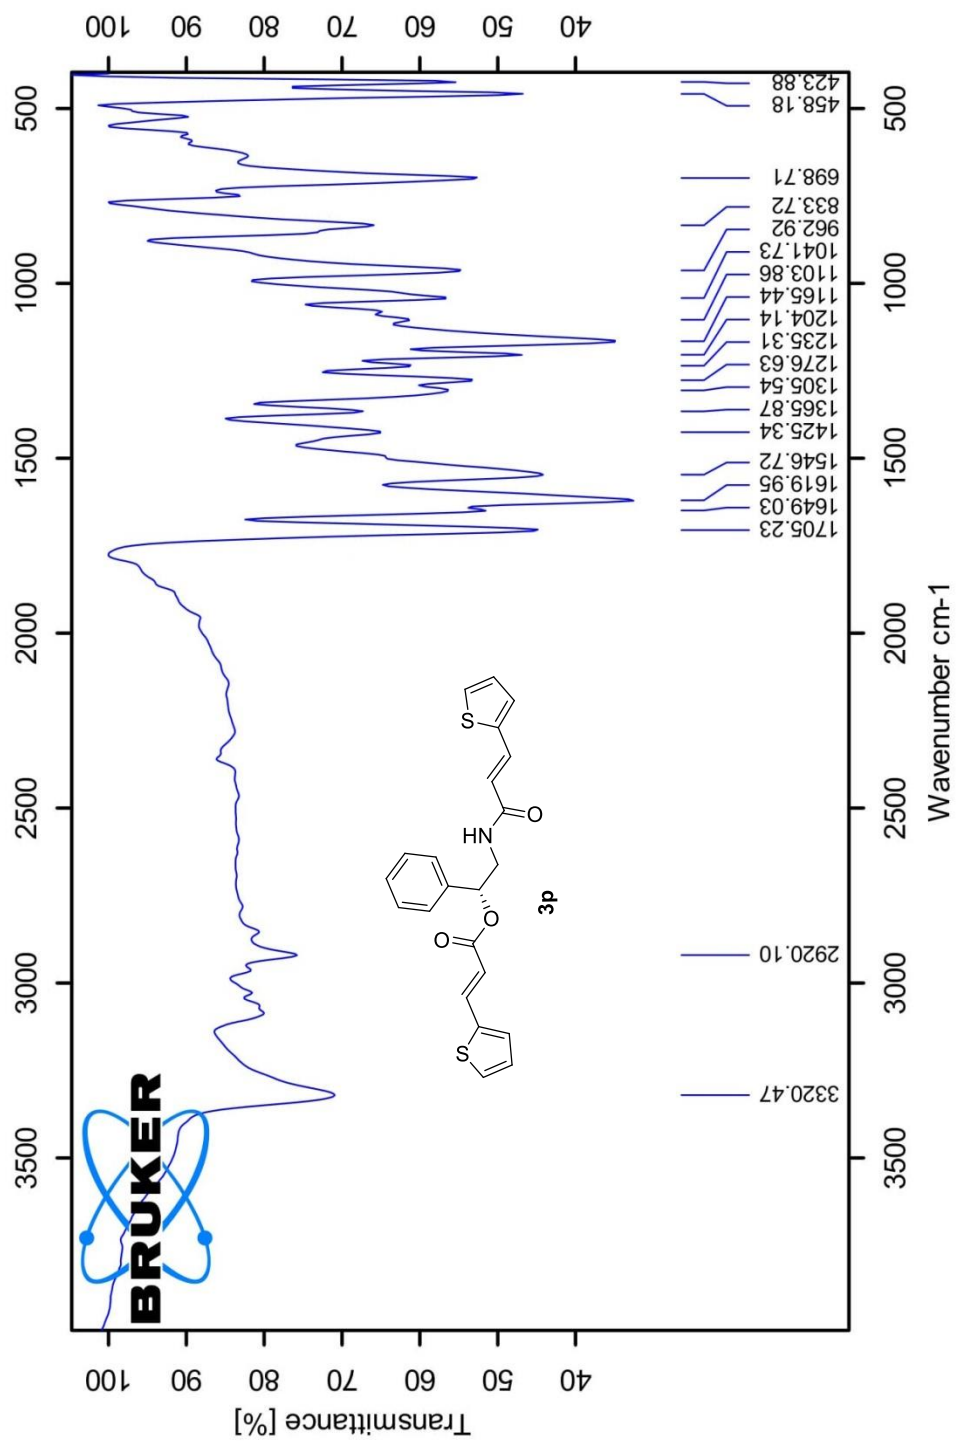

SAMPLE : PVS 3  
 TECHNIQUE : Thinfilm  
 USER : Default

SAMPLE SCANS : 48  
 DATE : 11-03-2019  
 TIME : 17:53:58

7.818  
7.772  
7.767  
7.722  
7.399  
7.384  
7.371  
7.342  
7.322  
7.305  
7.262  
7.202  
7.191  
7.066  
7.054  
7.050  
7.037  
7.023  
7.019  
7.007  
6.353  
6.327  
6.286  
6.247  
6.235  
6.194  
5.513  
5.497  
5.488  
5.473  
5.462  
5.448  
5.470  
4.646  
4.632  
4.607  
4.447  
4.432  
4.408  
4.393  
1.593  
0.070  
-0.000

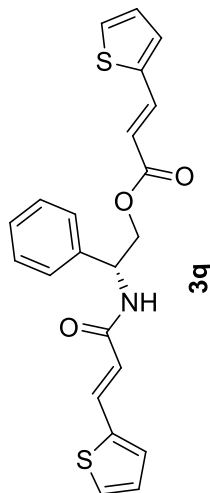

```

===== CHANNEL f1 =====
SF01 300.1318534 MHz
NUC1 1H
P1 13.00 usec
PLW1 10.6999981 W

F2 - Processing parameters
SI 65536
SF 300.1300062 MHz
WDW EM
SSB 0
LB 0.30 Hz
GB 0
PC 1.00

```

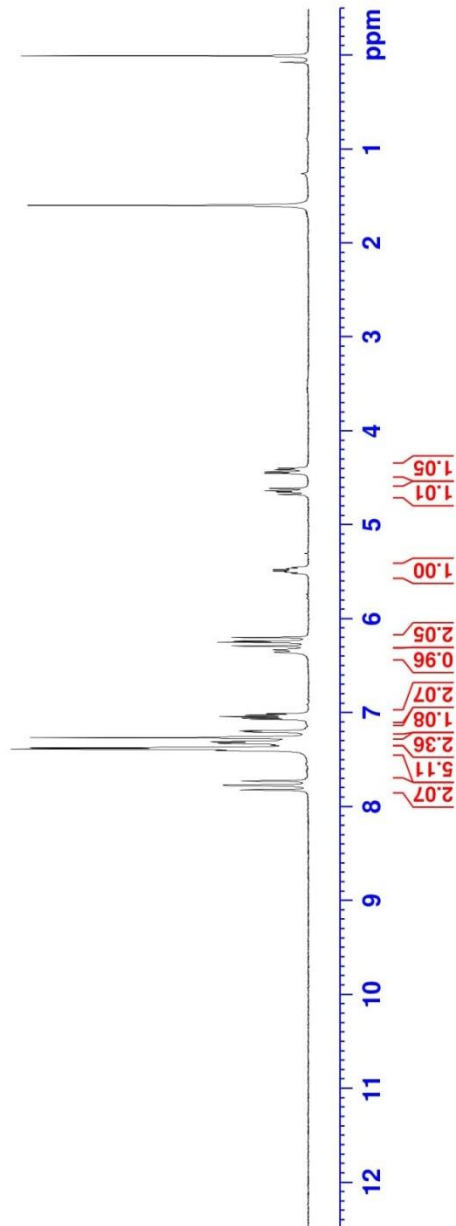

```

Current Data Parameters
NAME H22552H18
EXPNO 1
PROCNO 1

```

```

F2 - Acquisition Parameters
Date_ 20190209
Time 14.50
INSTRUM spect
PROBHD 5 mm BBO BB-1H
PULPROG zg30
TD 65536
SOLVENT CDCl3
NS 16
DS 2
SWH 6009.615 Hz
FIDRES 0.091699 Hz
AQ 5.4525952 sec
RG 406
DW 83.200 usec
DE 6.50 usec
TE 298.0 K
D1 1.0000000 sec
TD0 1

```

167.18  
165.24  
139.85  
139.29  
138.36  
138.29  
138.49  
131.44  
130.51  
128.93  
128.86  
128.16  
128.01  
127.51  
126.78  
119.10  
115.86

77.46  
77.03  
76.61  
66.22  
53.08

— 0.01

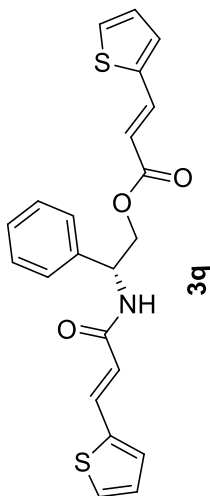

Current Data Parameters  
NAME C2552F9  
EXPNO 1  
PROCNO 1

F2 - Acquisition Parameters  
Date\_ 20190214  
Time 13.57  
INSTRUM spect  
PROBHD 5 mm BBO BB-1H  
PULPROG zgpg30  
TD 65536  
SOLVENT CDCl3  
NS 1024  
DS 4  
SWH 18028.846 Hz  
FIDRES 0.275098 Hz  
AQ 1.8175317 sec  
RG 645  
DW 27.733 usec  
DE 6.50 usec  
TE 300.0 K  
D1 2.0000000 sec  
D11 0.0300000 sec  
TD0 1

===== CHANNEL f1 =====  
SFO1 75.4752949 MHz  
NUC1 13C  
P1 9.47 usec  
PLW1 38.0000000 W

===== CHANNEL f2 =====  
SFO2 300.1312005 MHz  
NUC2 1H  
CPDPRG2 waltz16  
PCPD2 90.00 usec  
PLW2 10.6999981 W  
PLW12 0.2232500 W  
PLW13 0.1122900 W

F2 - Processing parameters  
SI 32768  
SF 75.4677485 MHz  
WDW EM  
SSB 0  
LB 1.00 Hz  
GB 0  
PC 1.40

200 180 160 140 120 100 80 60 40 20 ppm

## Qualitative Compound Identification Report

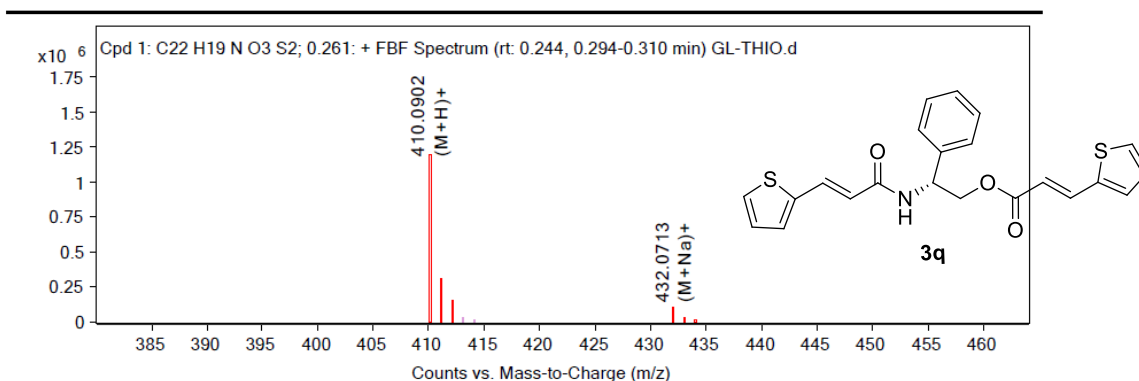

MS Spectrum Peak List

| m/z      | z | Abund      | Ion                 |
|----------|---|------------|---------------------|
| 410.0902 | 1 | 1193832.63 | (M+H) <sup>+</sup>  |
| 411.093  | 1 | 263636.94  | (M+H) <sup>+</sup>  |
| 412.0885 | 1 | 97219.84   | (M+H) <sup>+</sup>  |
| 432.0713 | 1 | 110280.63  | (M+Na) <sup>+</sup> |
| 433.0739 | 1 | 22857.13   | (M+Na) <sup>+</sup> |
| 434.069  | 1 | 9524.97    | (M+Na) <sup>+</sup> |

MS Spectrum

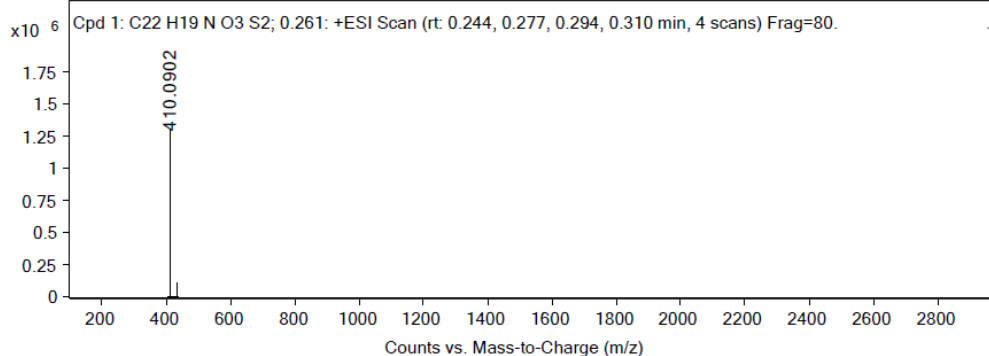

MS Zoomed Spectrum

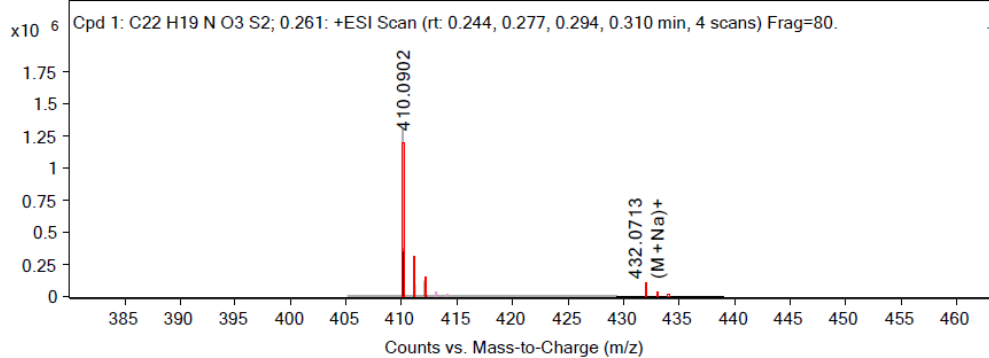

MS Spectrum Peak List

| m/z      | Calc m/z | Diff (ppm) | z | Abund      | Ion                |
|----------|----------|------------|---|------------|--------------------|
| 410.0902 | 410.0879 | -5.65      | 1 | 1193832.63 | (M+H) <sup>+</sup> |
| 410.0902 |          |            |   | 1362153.67 |                    |
| 411.093  | 411.091  | -4.83      | 1 | 263636.94  | (M+H) <sup>+</sup> |

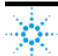

Agilent Technologies

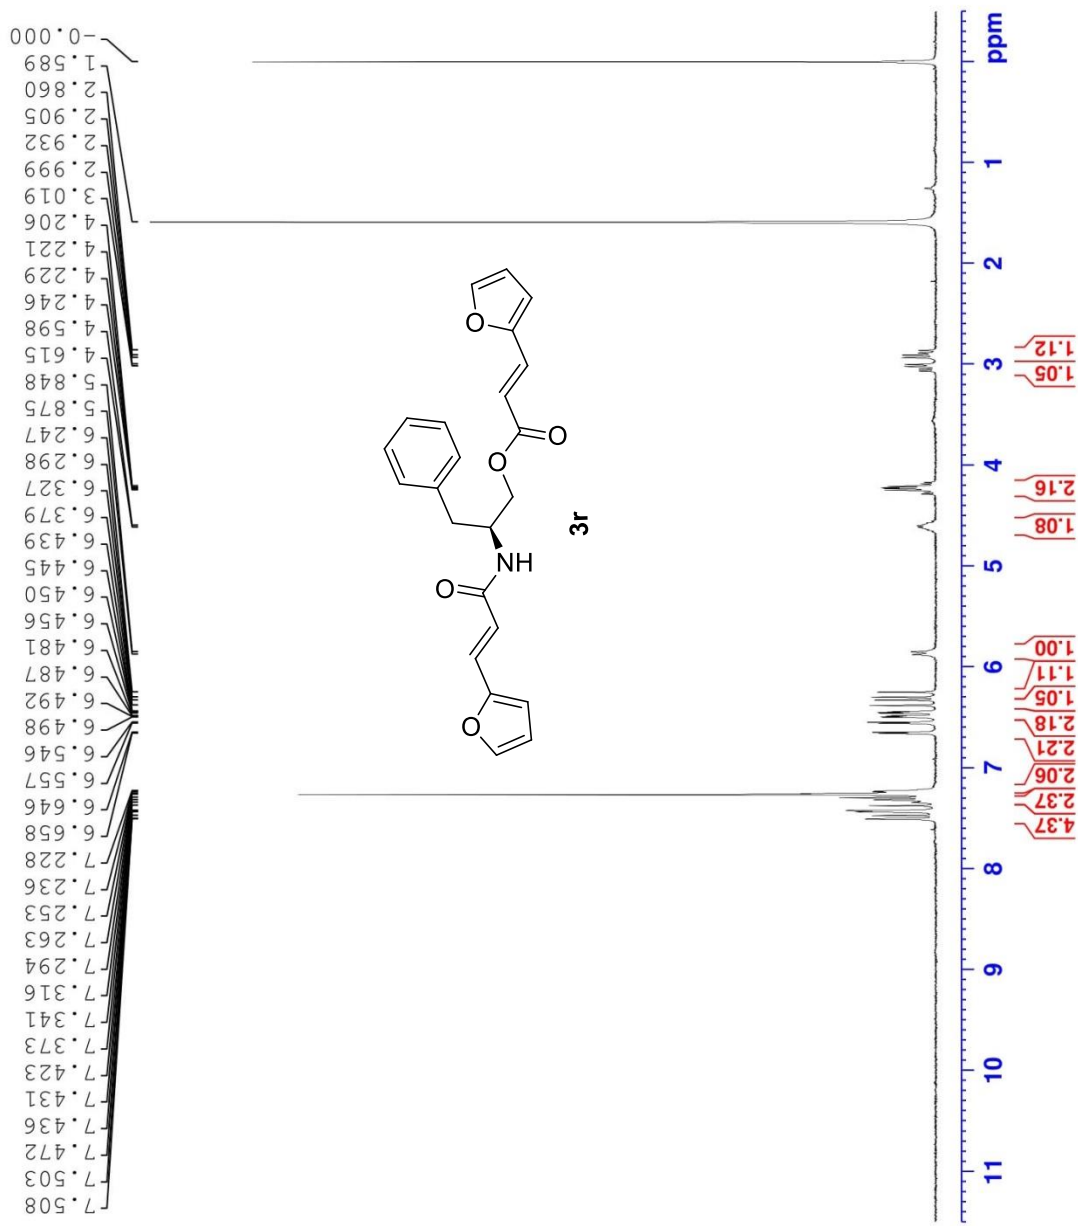

Current Data Parameters  
NAME H255215  
EXPNO 1  
PROCNO 1

F2 - Acquisition Parameters  
Date\_ 20190218  
Time 15:55  
INSTRUM spect  
PROBHD 5 mm BBO BB-1H  
PULPROG zg30  
TD 65536  
SOLVENT CDC13  
NS 16  
DS 2  
SWH 6009.615 Hz  
FIDRES 0.091699 Hz  
AQ 5.4525952 sec  
RG 456  
DE 83.200 usec  
TE 298.0 K  
D1 1.00000000 sec  
ID0 1

===== CHANNEL f1 =====  
SFO1 300.1318534 MHz  
NUC1 1H  
P1 13.00 usec  
PLW1 10.69999981 W

F2 - Processing parameters  
SI 65536  
SF 300.1300057 MHz  
WDW EM  
SSB 0  
LB 0  
GB 0  
PC 1.00

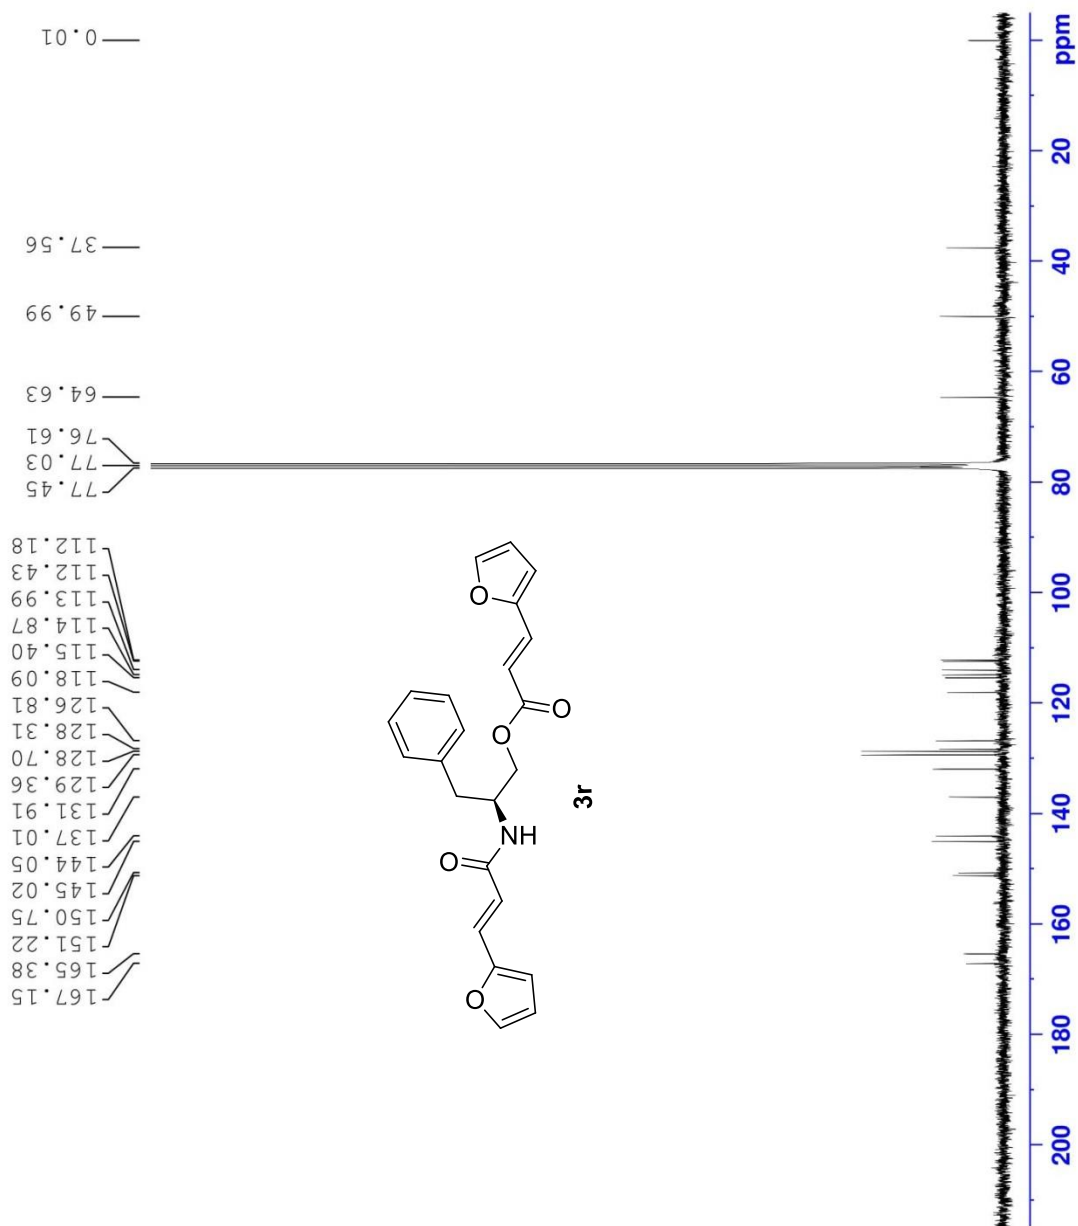

## Qualitative Compound Identification Report

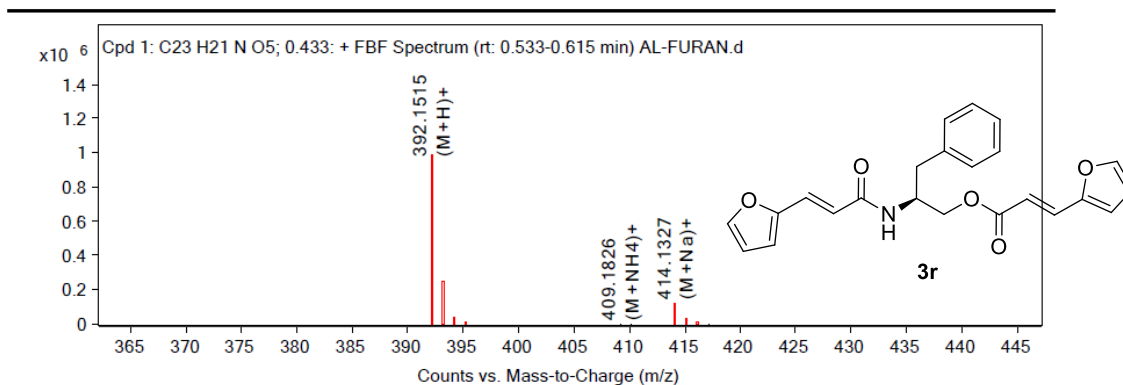

MS Spectrum Peak List

| m/z      | z | Abund     | Ion      |
|----------|---|-----------|----------|
| 392.1515 | 1 | 962780.44 | (M+H)+   |
| 393.1543 | 1 | 225074.88 | (M+H)+   |
| 394.1559 | 1 | 26647.7   | (M+H)+   |
| 395.1589 | 1 | 2851.44   | (M+H)+   |
| 409.1826 | 1 | 344.36    | (M+NH4)+ |
| 410.132  | 1 | 49.56     | (M+NH4)+ |
| 414.1327 | 1 | 134636.46 | (M+Na)+  |
| 415.1354 | 1 | 25822.48  | (M+Na)+  |
| 416.1375 | 1 | 3815.51   | (M+Na)+  |
| 417.14   | 1 | 488.55    | (M+Na)+  |

MS Spectrum

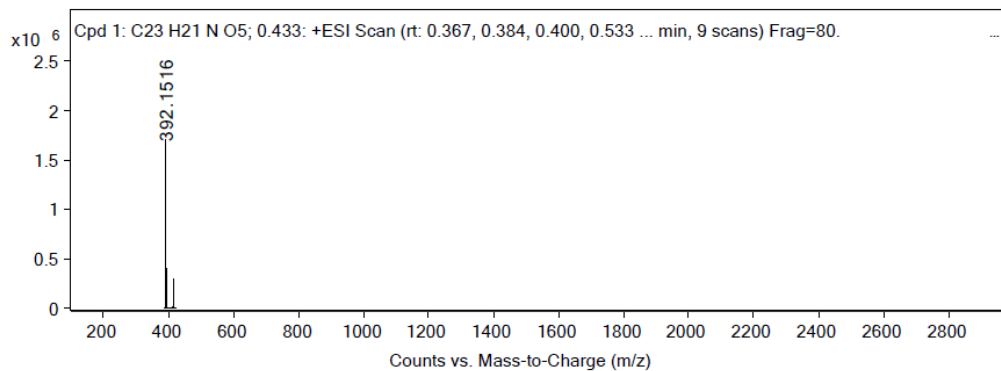

MS Zoomed Spectrum

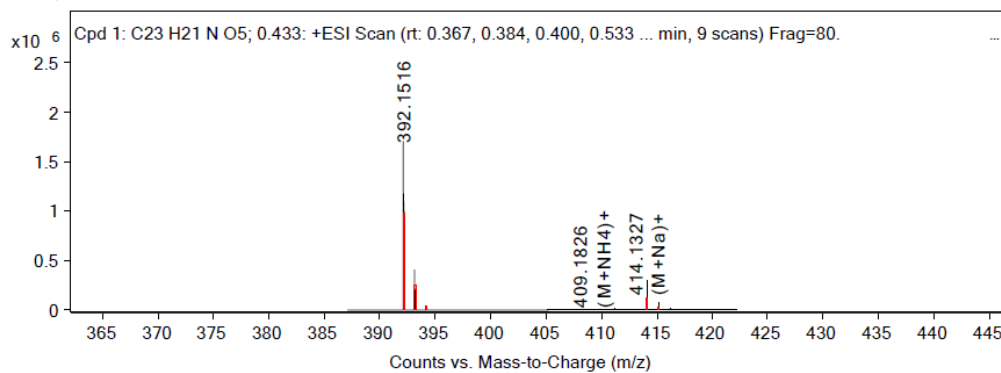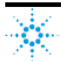

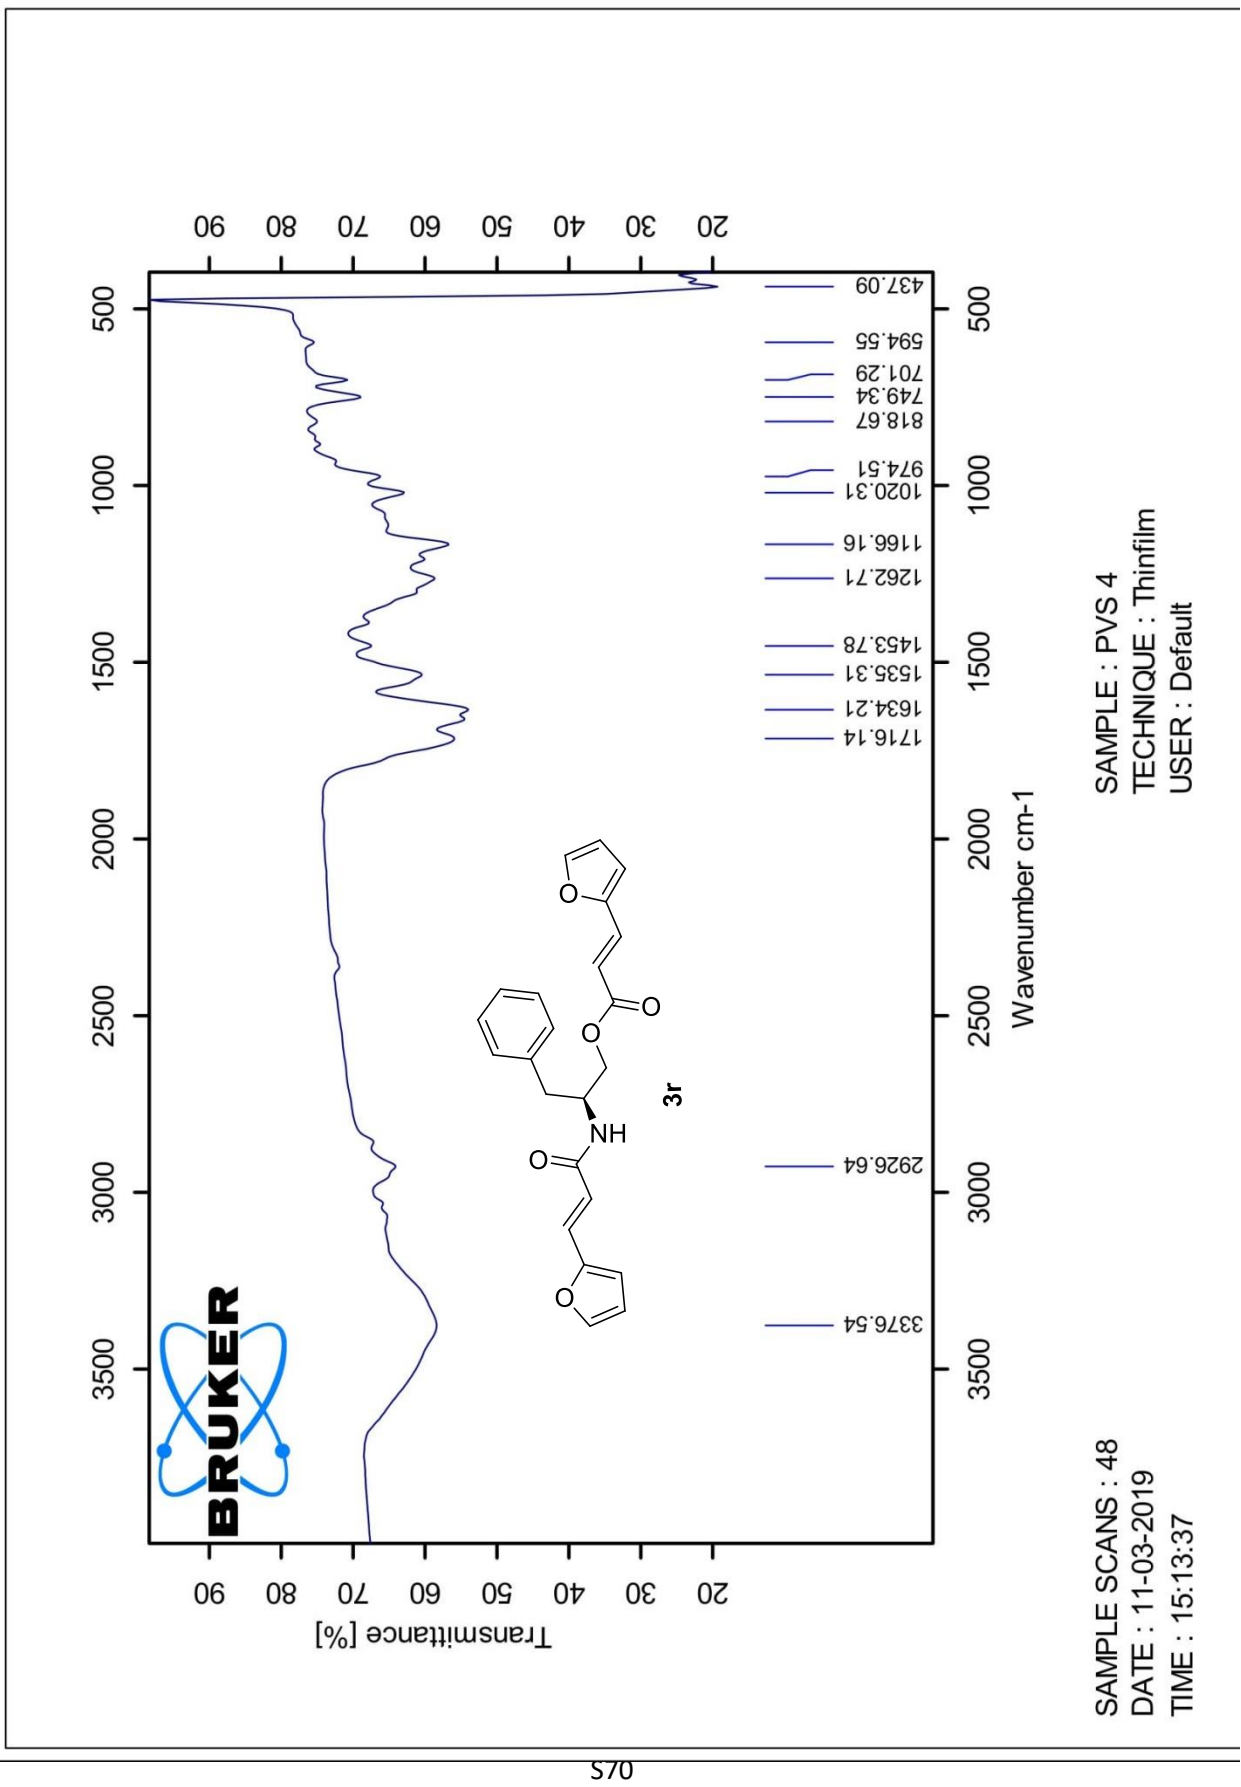

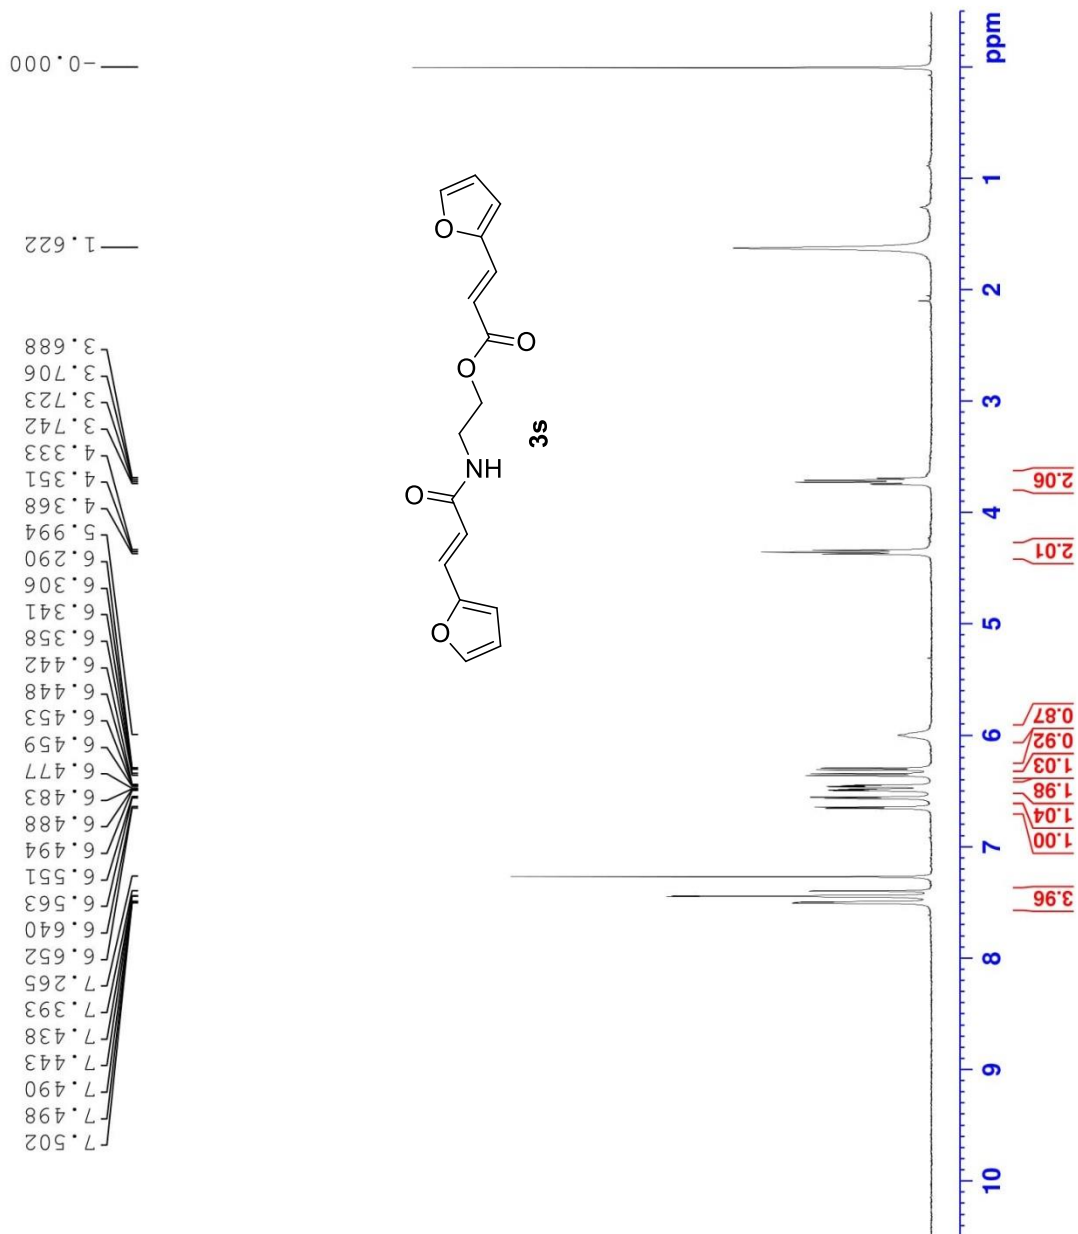

Current Data Parameters  
NAME H2552I2  
EXPNO 1  
PROCNO 1

F2 - Acquisition Parameters  
Date\_ 20190214  
Time 15:52  
INSTRUM spect  
PROBHD 5 mm BBO BB-1H  
PULPROG zg30  
TD 65536  
SOLVENT CDCl3  
NS 16  
DS 2  
SWH 6009.615 Hz  
FIDRES 0.091699 Hz  
AQ 5.4525952 sec  
RG 406  
DW 83.200 usec  
DE 6.50 usec  
TE 298.0 K  
D1 1.0000000 sec  
ID0 1

===== CHANNEL f1 =====  
SFO1 300.1318534 MHz  
NUC1 1H  
P1 13.00 usec  
PLW1 10.6999981 W

F2 - Processing parameters  
SI 65536  
SF 300.1300053 MHz  
WDW EM  
SSB 0  
LB 0  
GB 0  
PC 1.00

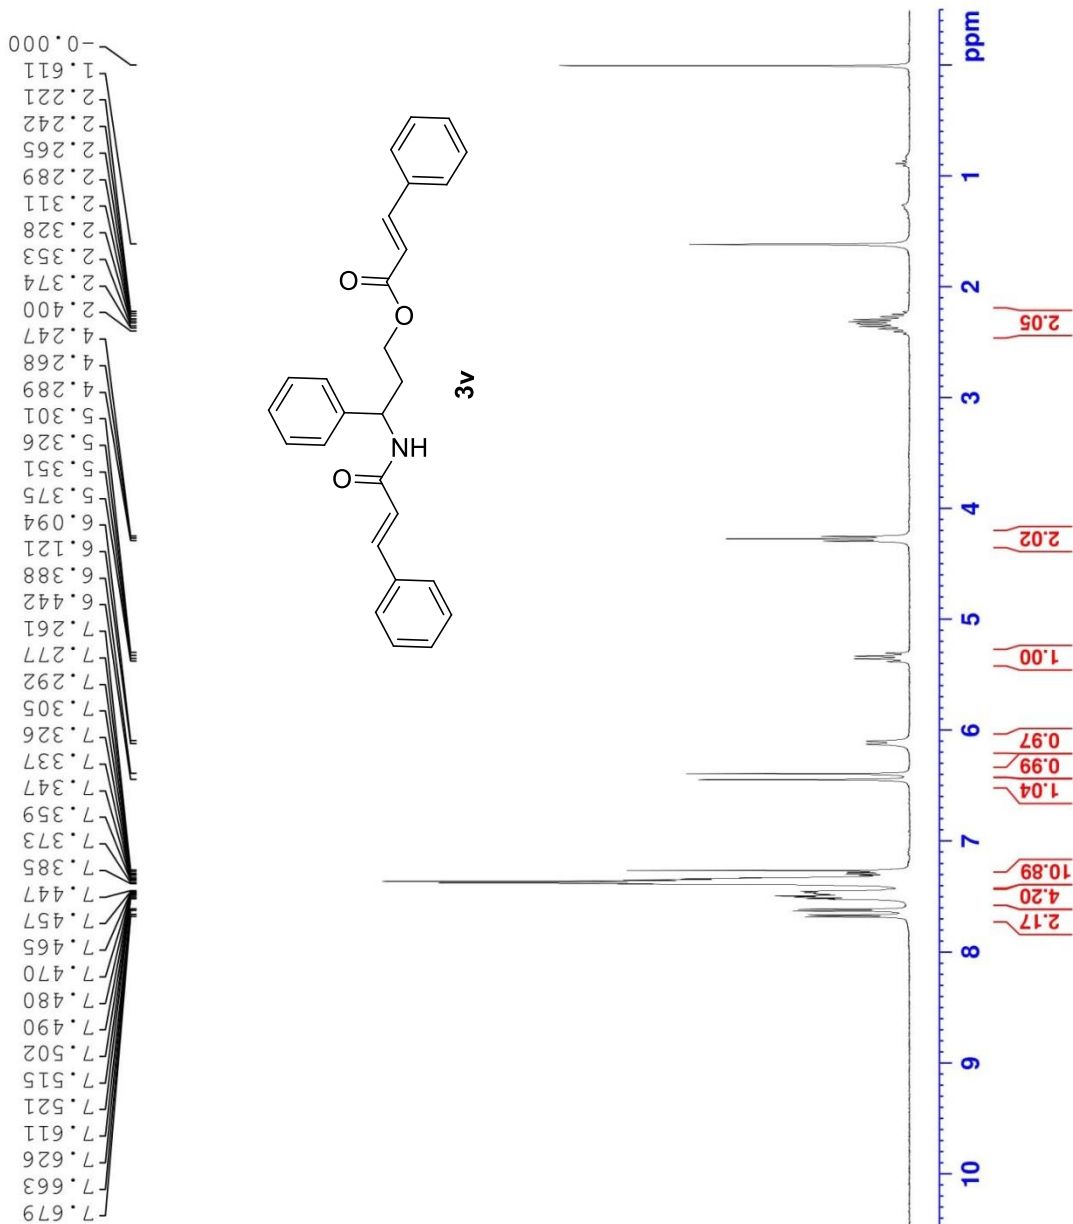

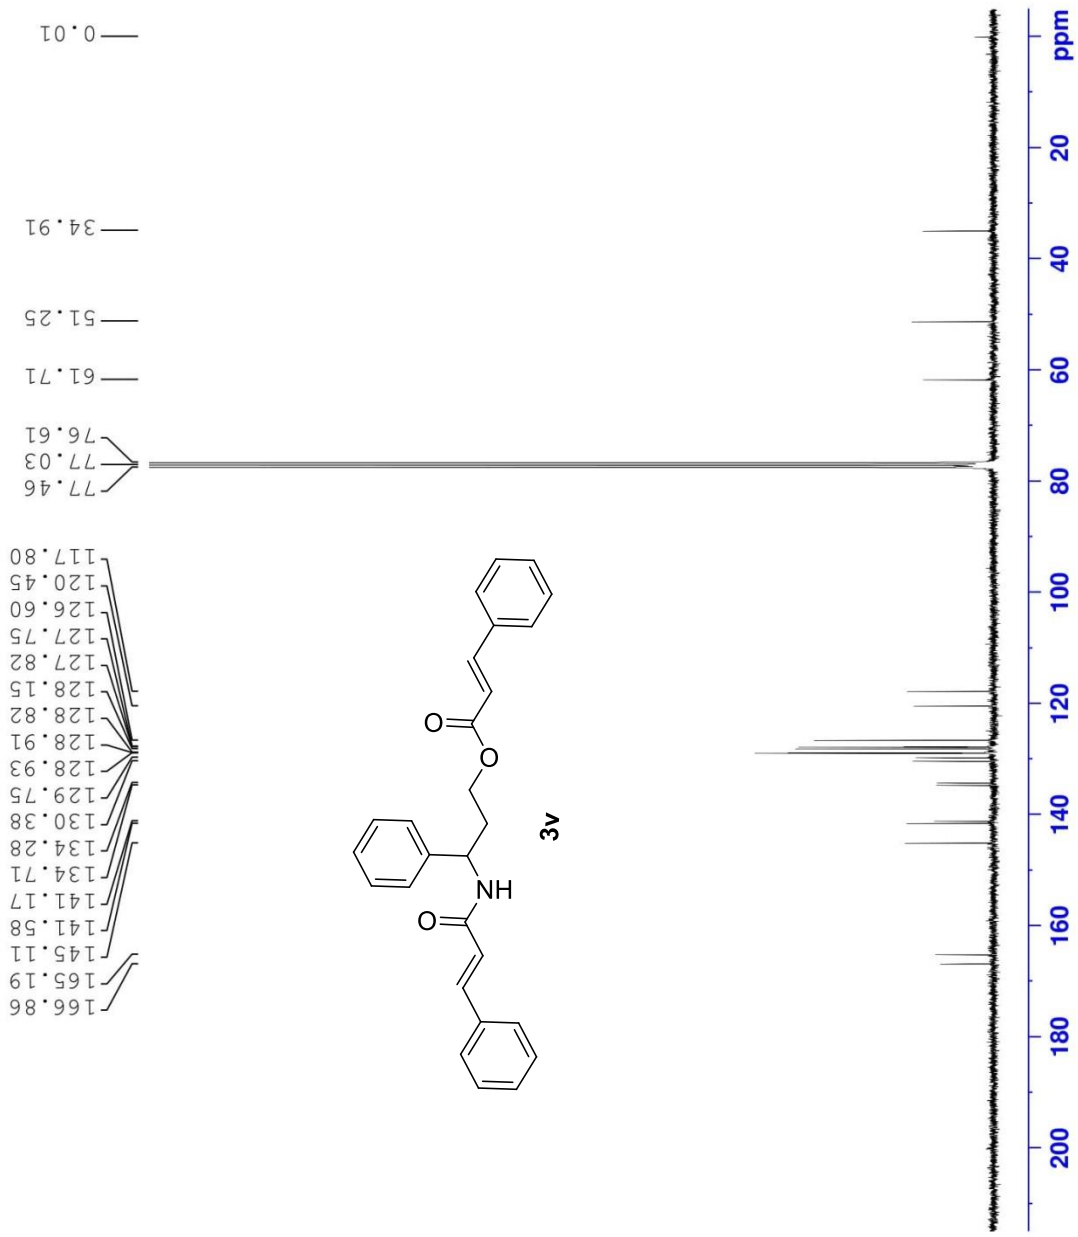

Current Data Parameters  
NAME C3339A3  
EXPNO 1  
PROCNO 1

F2 - Acquisition Parameters  
Date\_ 20190227  
Time 22.29  
INSTRUM spect  
PROBHD 5 mm BBO BB-1H  
PULPROG zgpg30  
TD 65536  
SOLVENT CDCl3  
NS 3072  
DS 4  
SWH 18028.846 Hz  
FIDRES 0.275098 Hz  
AQ 1.8175317 sec  
RG 645  
DW 27.733 usec  
DE 6.50 usec  
TE 300.0 K  
D1 2.00000000 sec  
D11 0.03000000 sec  
TD0 1

===== CHANNEL f1 =====  
SFO1 75.4752949 MHz  
NUC1 13C  
P1 9.47 usec  
PLW1 38.00000000 W

===== CHANNEL f2 =====  
SFO2 300.1312005 MHz  
NUC2 1H  
CPDPRG[2] waltz16  
PCPD2 90.00 usec  
PLW2 10.69999981 W  
PLW12 0.22325000 W  
PLW13 0.11229000 W

F2 - Processing parameters  
SI 32768  
SF 75.4677485 MHz  
WDW EM  
SSB 0  
LB 1.00 Hz  
GB 0  
PC 1.40

# Qualitative Compound Identification Report

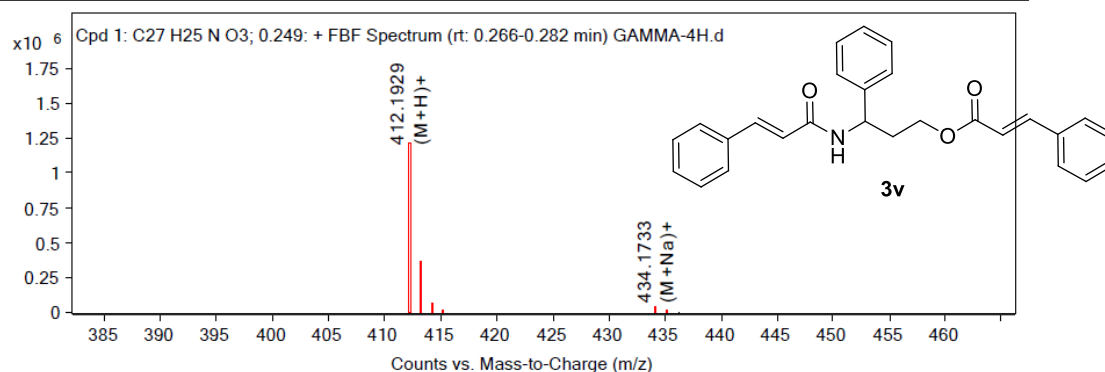

## MS Spectrum Peak List

| m/z      | z | Abund      | Ion     |
|----------|---|------------|---------|
| 412.1929 | 1 | 1210681.25 | (M+H)+  |
| 413.196  | 1 | 323496.75  | (M+H)+  |
| 414.199  | 1 | 39631.24   | (M+H)+  |
| 415.2021 | 1 | 4043.6     | (M+H)+  |
| 434.1733 | 1 | 42720.44   | (M+Na)+ |
| 435.1765 | 1 | 11606.66   | (M+Na)+ |
| 436.1795 | 1 | 1932.75    | (M+Na)+ |

## MS Spectrum

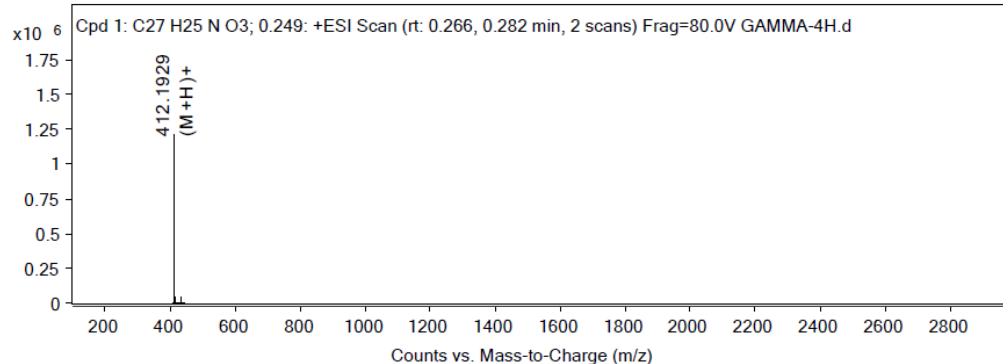

## MS Zoomed Spectrum

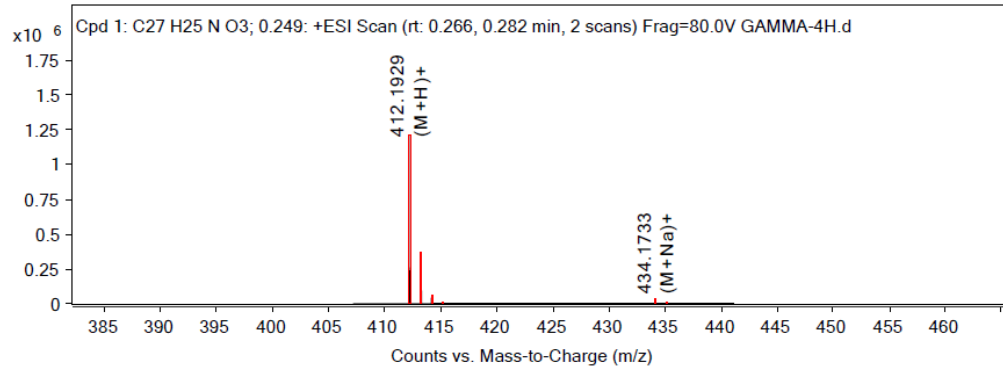

## MS Spectrum Peak List

| m/z      | Calc m/z | Diff(ppm) | z | Abund      | Ion    |
|----------|----------|-----------|---|------------|--------|
| 412.1929 | 412.1907 | -5.36     | 1 | 1210681.25 | (M+H)+ |
| 412.1929 | 412.1907 | -5.4      | 1 | 1210681.25 | (M+H)+ |

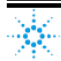

Agilent Technologies

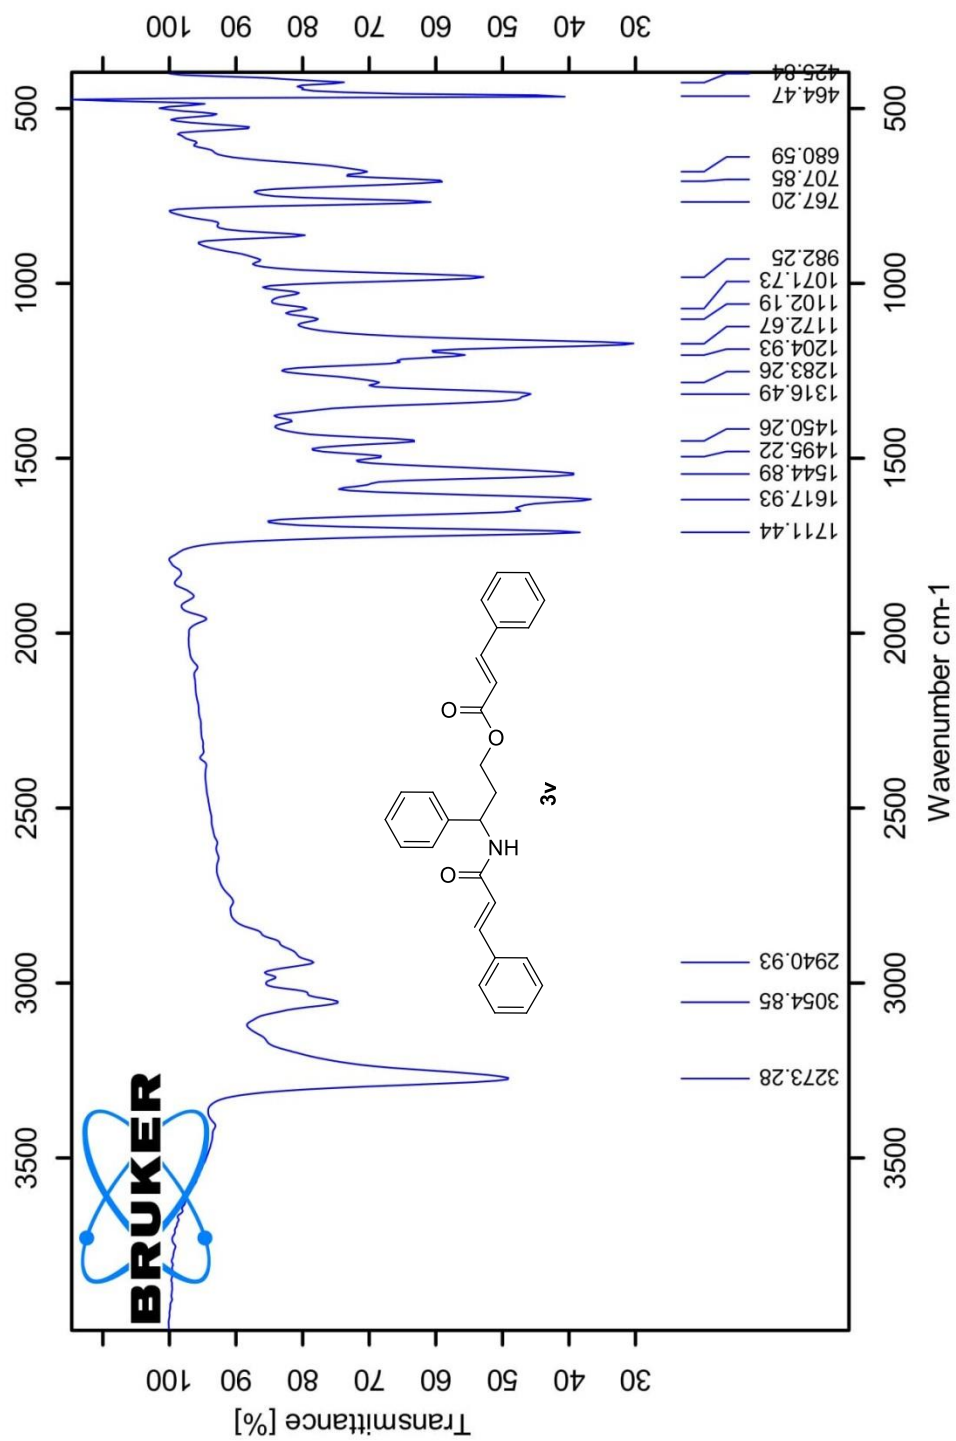

SAMPLE : PVS 5  
 TECHNIQUE : Thinfilm  
 USER : Default

SAMPLE SCANS : 48  
 DATE : 11-03-2019  
 TIME : 18:07:14

1.583  
2.176  
2.233  
2.256  
2.280  
2.301  
2.322  
2.346  
2.368  
2.393  
4.243  
4.265  
4.283  
5.286  
5.303  
5.311  
5.337  
5.361  
6.014  
6.041  
6.353  
6.361  
6.405  
6.415  
7.263  
7.282  
7.298  
7.311  
7.327  
7.339  
7.354  
7.367  
7.396  
7.458  
7.489  
7.517  
7.534  
7.539  
7.586  
7.593  
7.608

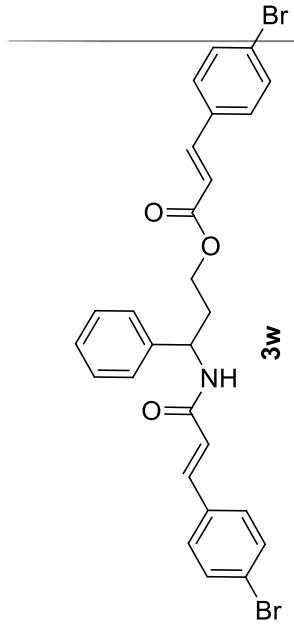

Current Data Parameters  
NAME H2552117  
EXPNO 1  
PROCNO 1

F2 - Acquisition Parameters  
Date\_ 20190226  
Time 18:52  
INSTRUM spect  
PROBHD 5 mm BBO BB-1H  
PULPROG zg30  
TD 65536  
SOLVENT CDC13  
NS 16  
DS 2  
SWH 6009.615 Hz  
FIDRES 0.091699 Hz  
AQ 5.4525952 sec  
RG 406  
DW 83.200 usec  
DE 6.50 usec  
TE 298.0 K  
D1 1.0000000 sec  
ID0 1

===== CHANNEL f1 =====  
SFO1 300.1318534 MHz  
NUC1 1H  
P1 13.00 usec  
PLW1 10.6999981 W

F2 - Processing parameters  
SI 65536  
SF 300.1300059 MHz  
WDW EM  
SSB 0  
LB 0  
GB 0  
PC 1.00

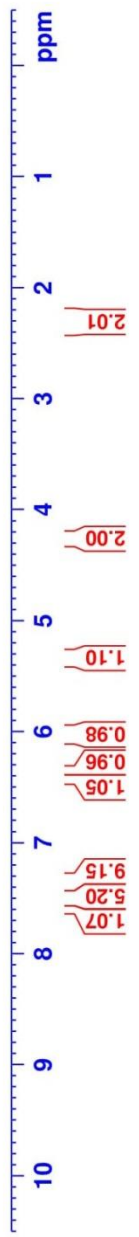

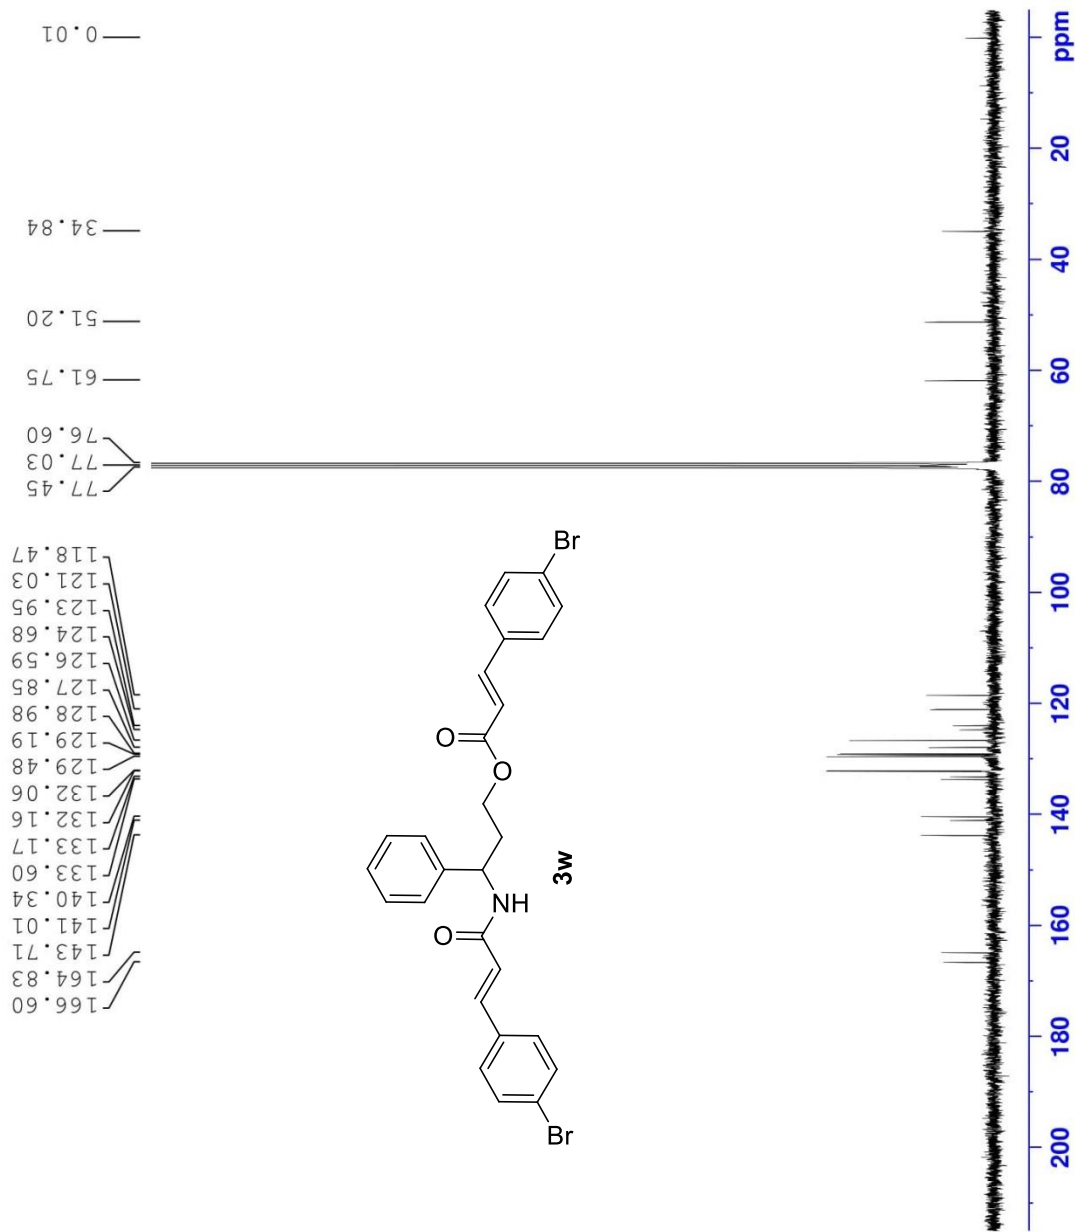

## Qualitative Compound Identification Report

|                        |                                                     |                          |                                 |
|------------------------|-----------------------------------------------------|--------------------------|---------------------------------|
| Data File              | GAMMA-4Br.d                                         | Sample Name              | 070319-35-EXT-GAMMA-4Br         |
| Sample Type            | Sample                                              | Position                 | P1-D5                           |
| Instrument Name        | Instrument 1                                        | User Name                |                                 |
| Acq Method             | Direct Infusion_HPLC.m                              | Acquired Time            | 07-03-2019 14:19:22 (UTC+05:30) |
| IRM Calibration Status | Success                                             | DA Method                | Default.m                       |
| Comment                |                                                     |                          |                                 |
| Sample Group           |                                                     |                          |                                 |
| Stream Name            | LC 1                                                | Info.                    |                                 |
| Acquisition SW Version | 6200 series TOF/6500 series Q-TOF B.08.00 (B8058.0) | Acquisition Time (Local) | 07-03-2019 14:19:22 (UTC+05:30) |
| QTOF Firmware Version  | 20.698                                              | QTOF Driver Version      | 8.00.00                         |
|                        |                                                     | Tune Mass Range Max.     | 3200                            |

Compound Table

| Compound Label | RT    | Mass |
|----------------|-------|------|
| Cpd 1: 0.269   | 0.269 |      |
| Cpd 2: 0.467   | 0.467 |      |

| Compound Label | RT    | Algorithm           |
|----------------|-------|---------------------|
| Cpd 1: 0.269   | 0.269 | Spectrum Extraction |

MS Spectrum

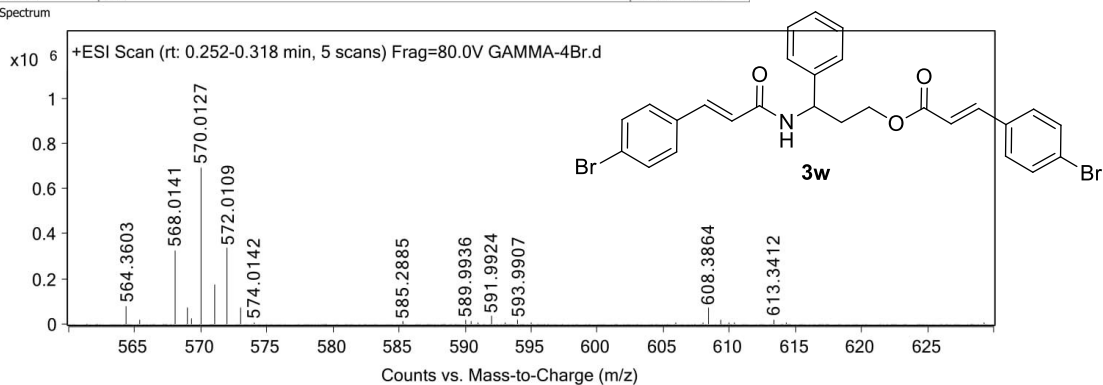

MS Zoomed Spectrum

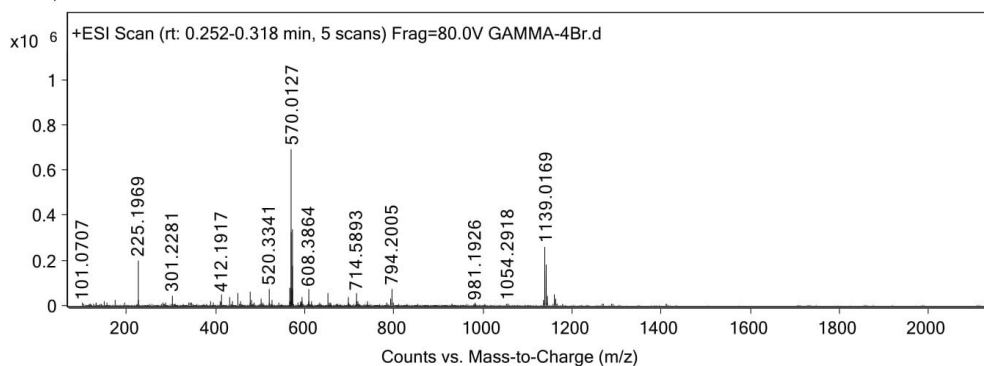

MS Spectrum Peak List

| m/z       | z | Abund     |
|-----------|---|-----------|
| 225.1969  | 1 | 200764.67 |
| 564.3603  | 1 | 81158.5   |
| 568.0141  | 1 | 327633.81 |
| 570.0127  | 1 | 692811.69 |
| 571.015   | 1 | 174667.17 |
| 572.0109  | 1 | 335541.81 |
| 1137.0173 | 1 | 150325.94 |

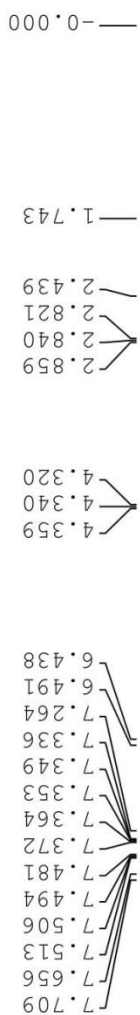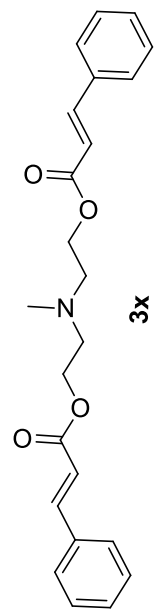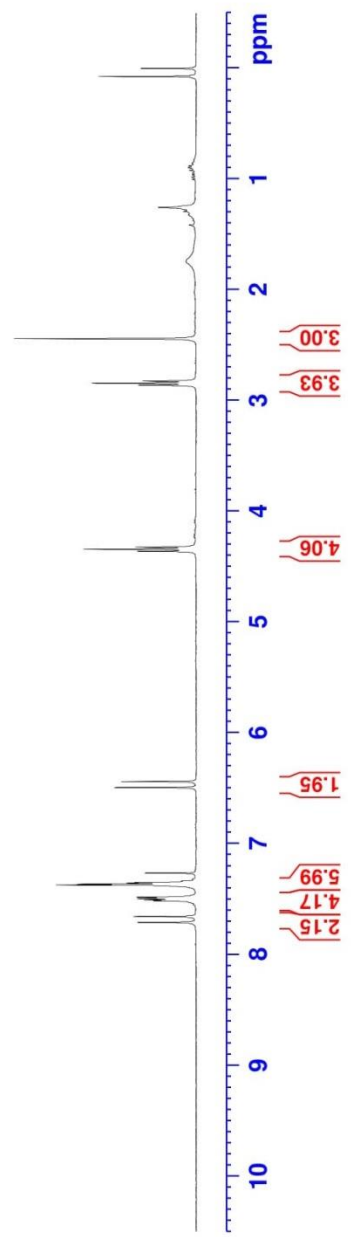

Current Data Parameters  
 NAME H25552118  
 EXNO 1  
 PROCNO 1

F2 - Acquisition Parameters  
 Date\_ 20190301  
 Time 16.48  
 INSTRUM spect  
 PROBHD 5 mm BBO BB-1H  
 PULPROG zg30  
 TD 65536  
 SOLVENT CDCl3  
 NS 16  
 DS 2  
 SWH 6009.615 Hz  
 FIDRES 0.091699 Hz  
 AQ 5.4525952 sec  
 RG 181  
 DW 83.200 usec  
 DE 6.50 usec  
 TE 298.0 K  
 D1 1.0000000 sec  
 TD0 1

===== CHANNEL f1 =====  
 SFO1 300.1318534 MHz  
 NUC1 1H  
 P1 13.00 usec  
 PLW1 10.69999981 W

F2 - Processing parameters  
 SI 65536  
 SF 300.1300056 MHz  
 WDW EM  
 SSB 0  
 LB 0  
 GB 0  
 PC 1.00

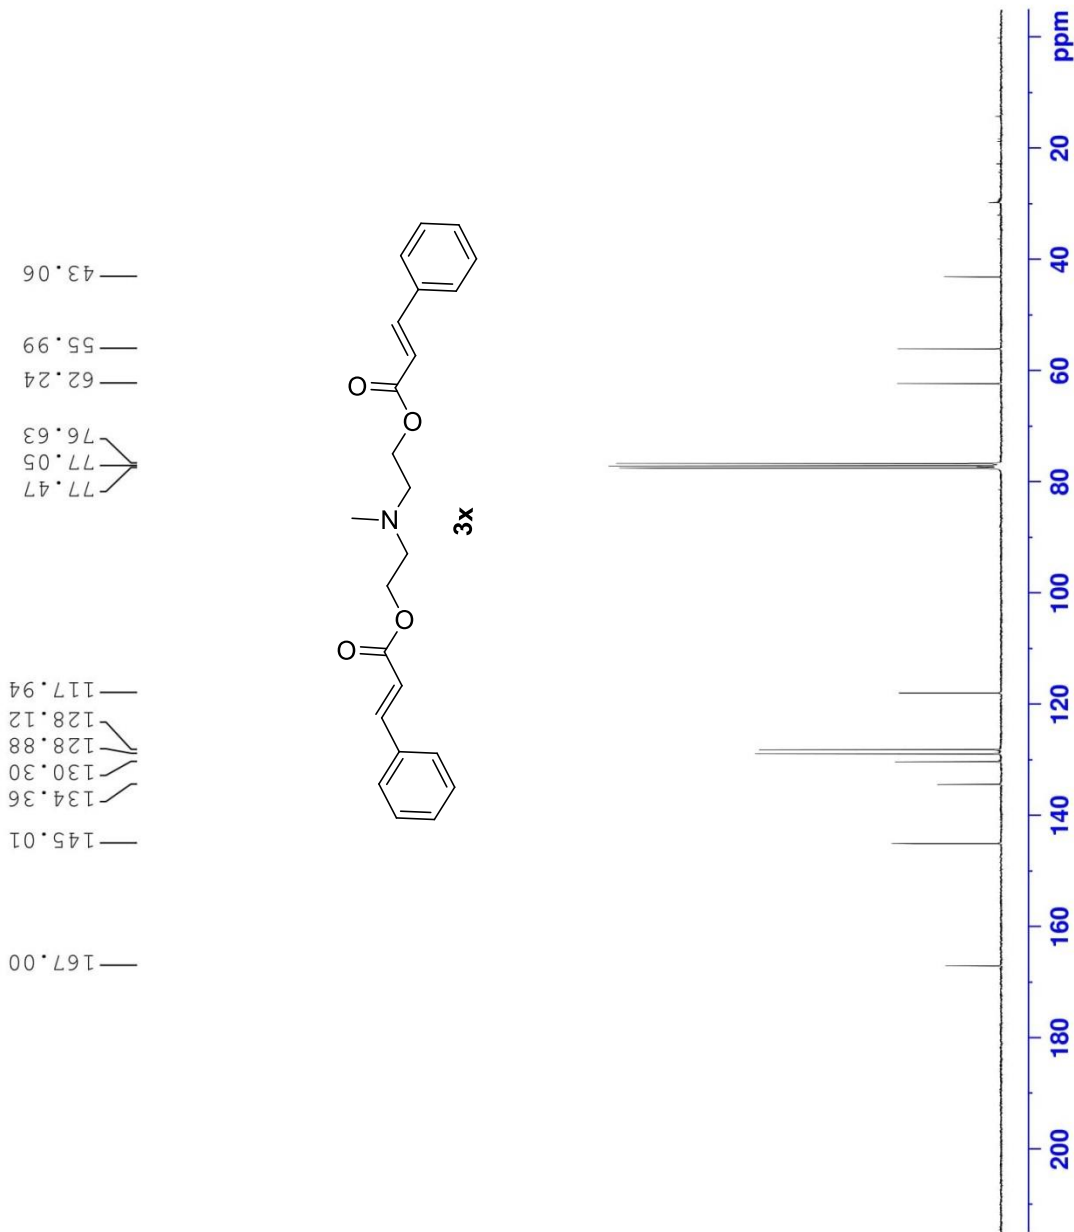

# Qualitative Compound Identification Report

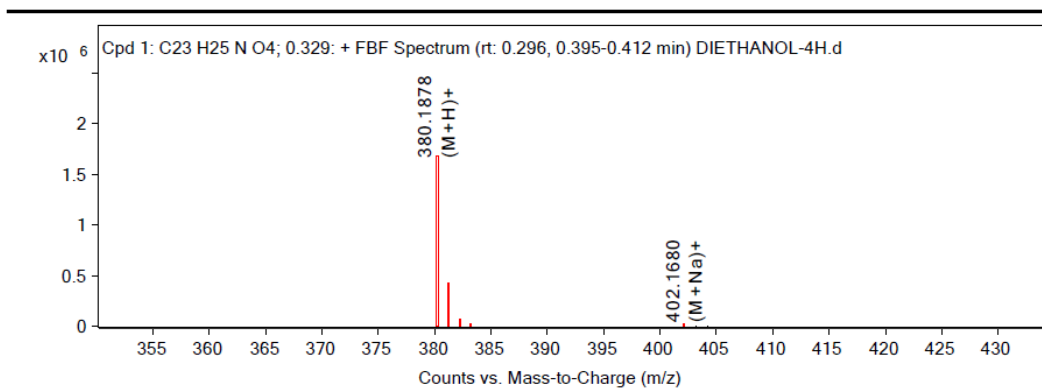

MS Spectrum Peak List

| m/z      | z | Abund      | Ion     |
|----------|---|------------|---------|
| 380.1878 | 1 | 1672459.63 | (M+H)+  |
| 381.1909 | 1 | 383206.41  | (M+H)+  |
| 382.193  | 1 | 41640.9    | (M+H)+  |
| 383.1954 | 1 | 4396.21    | (M+H)+  |
| 402.1680 | 1 | 13357.99   | (M+Na)+ |
| 403.1708 | 1 | 3175       | (M+Na)+ |
| 404.1752 | 1 | 491.79     | (M+Na)+ |

MS Spectrum

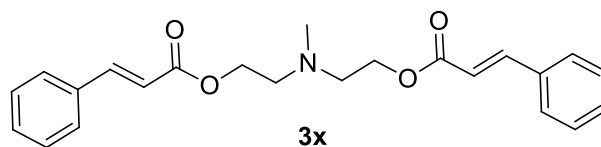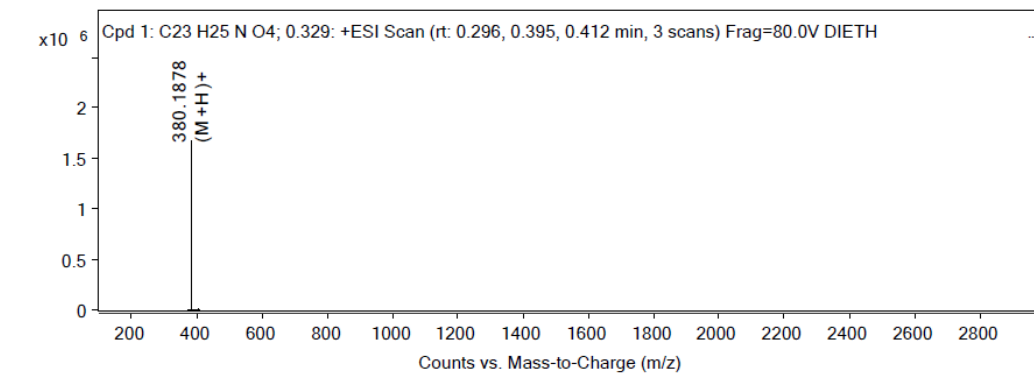

MS Zoomed Spectrum

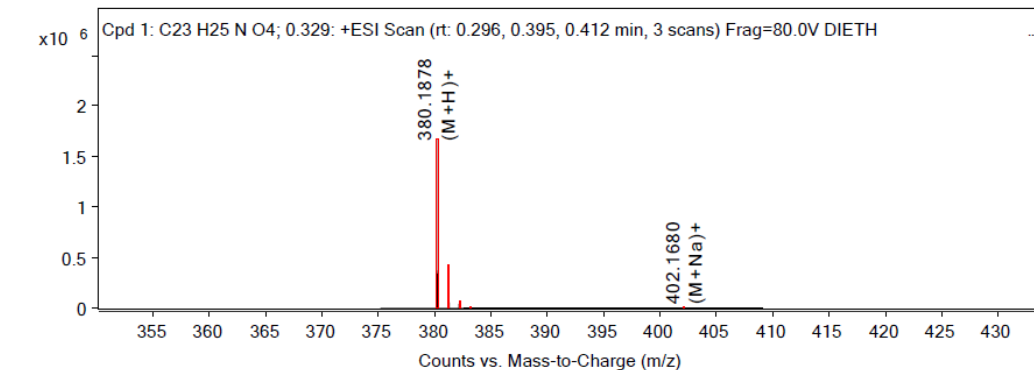

MS Spectrum Peak List

| m/z      | Calc m/z | Diff (ppm) | z | Abund      | Ion    |
|----------|----------|------------|---|------------|--------|
| 380.1878 | 380.1858 | -5.67      | 1 | 1672459.63 | (M+H)+ |
| 380.1878 |          |            |   | 1672434.4  |        |

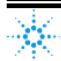

Agilent Technologies

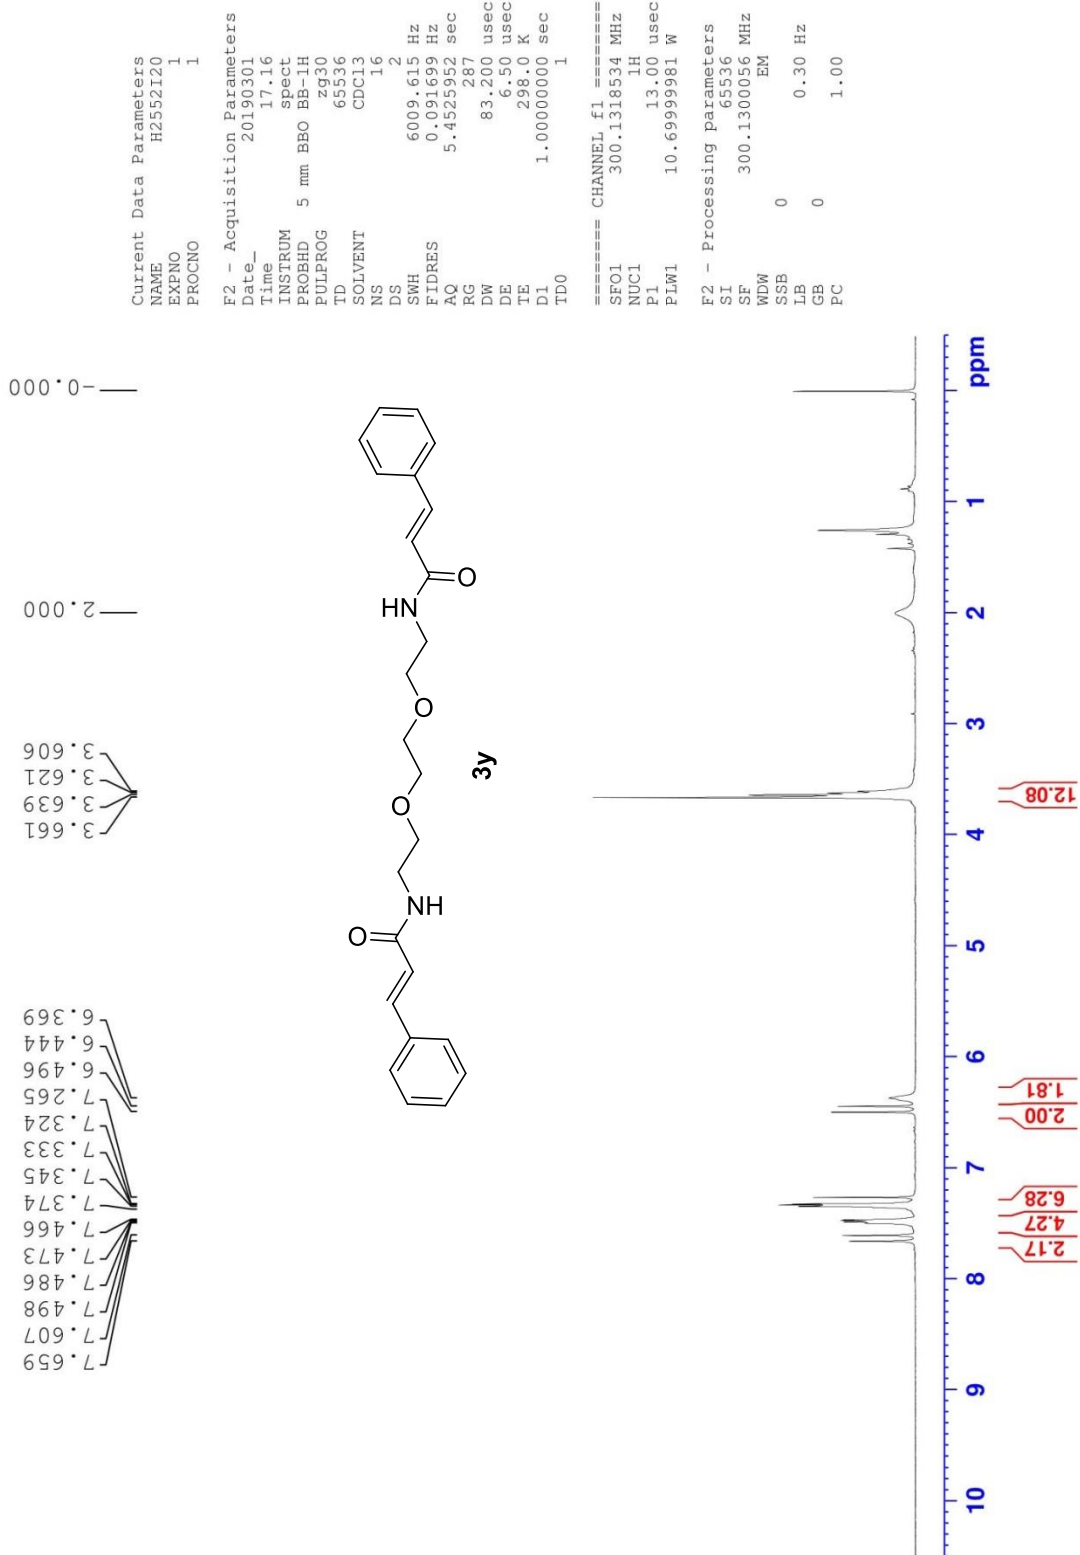

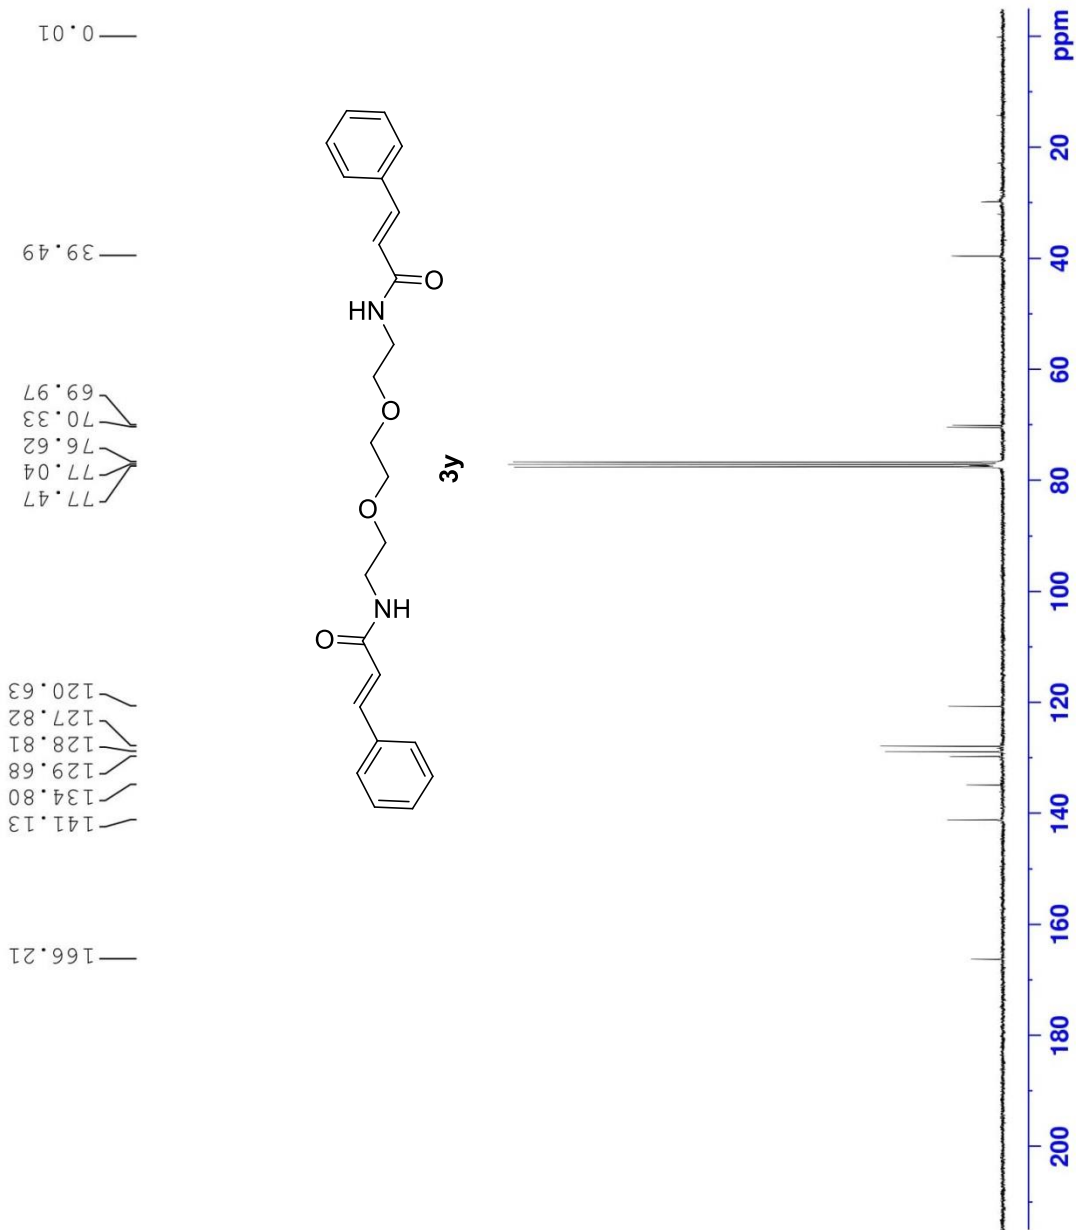

Current Data Parameters  
NAME C3339A6  
EXPNO 1  
PROCNO 1

F2 - Acquisition Parameters  
Date\_ 20190306  
Time 15:25  
INSTRUM spect  
PROBHD 5 mm BBO BB-1H  
PULPROG zgpg30  
TD 65536  
SOLVENT CDCl3  
NS 2048  
DS 4  
SWH 18028.846 Hz  
FIDRES 0.275098 Hz  
AQ 1.8175317 sec  
RG 724  
DE 27.733 usec  
TE 300.0 K  
D1 2.00000000 sec  
D11 0.03000000 sec  
TD0 1

===== CHANNEL f1 =====  
SFO1 75.4752949 MHz  
NUC1 13C  
P1 9.47 usec  
PLW1 38.00000000 W

===== CHANNEL f2 =====  
SFO2 300.1312005 MHz  
NUC2 1H  
CPDPRG2 waltz16  
PCPD2 90.00 usec  
PLW2 10.69999981 W  
PLW12 0.22325000 W  
PLW13 0.11229000 W

F2 - Processing parameters  
SI 32768  
SF 75.4677485 MHz  
WDW EM  
SSB 0  
LB 1.00 Hz  
GB 0  
PC 1.40

# Qualitative Compound Identification Report

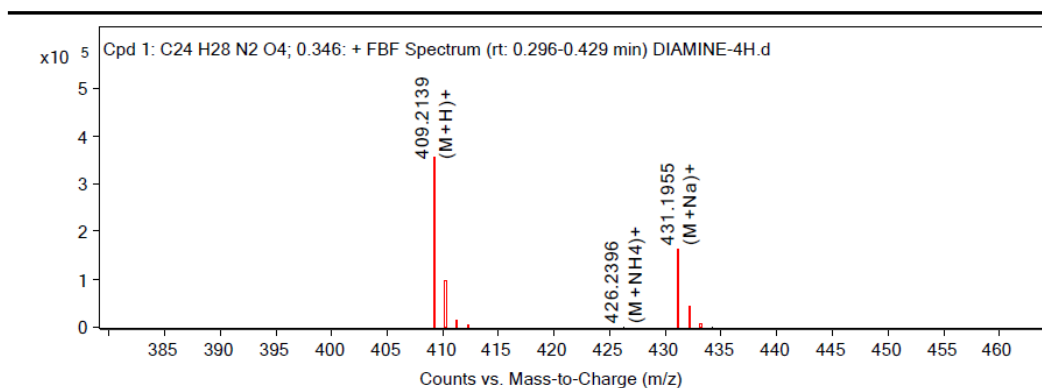

MS Spectrum Peak List

| m/z      | z | Abund     | Ion      |
|----------|---|-----------|----------|
| 409.2139 | 1 | 354375.47 | (M+H)+   |
| 410.2162 | 1 | 72250.06  | (M+H)+   |
| 411.2196 | 1 | 10406.9   | (M+H)+   |
| 412.2220 | 1 | 1292.17   | (M+H)+   |
| 426.2396 | 1 | 312.73    | (M+NH4)+ |
| 431.1955 | 1 | 163306.84 | (M+Na)+  |
| 432.1981 | 1 | 34727.71  | (M+Na)+  |
| 433.2018 | 1 | 5256.5    | (M+Na)+  |
| 434.206  | 1 | 732.08    | (M+Na)+  |

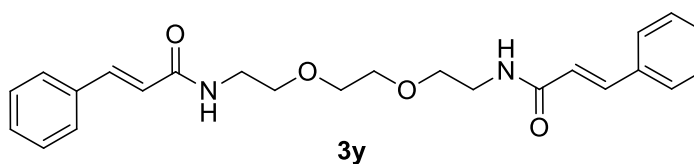

MS Spectrum

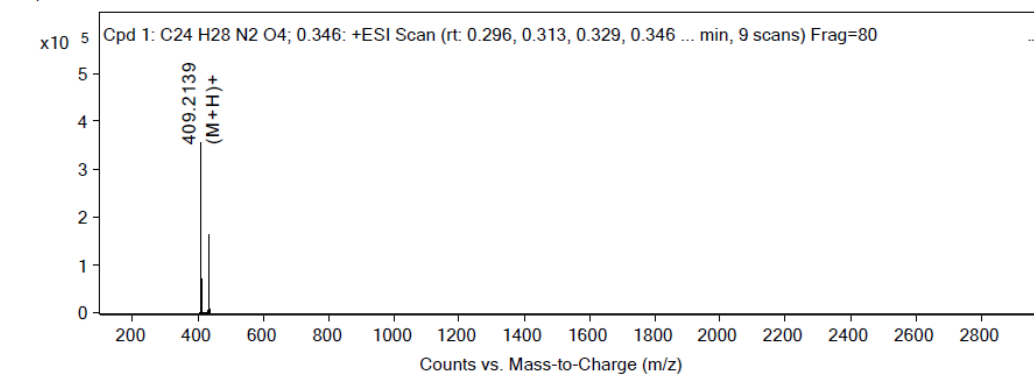

MS Zoomed Spectrum

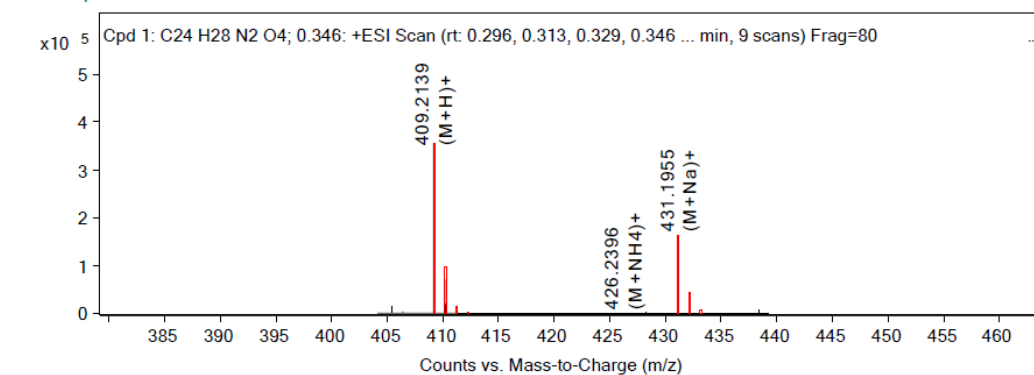

MS Spectrum Peak List

| m/z | Calc m/z | Diff(ppm) | z | Abund | Ion |
|-----|----------|-----------|---|-------|-----|
|-----|----------|-----------|---|-------|-----|

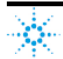

Agilent Technologies

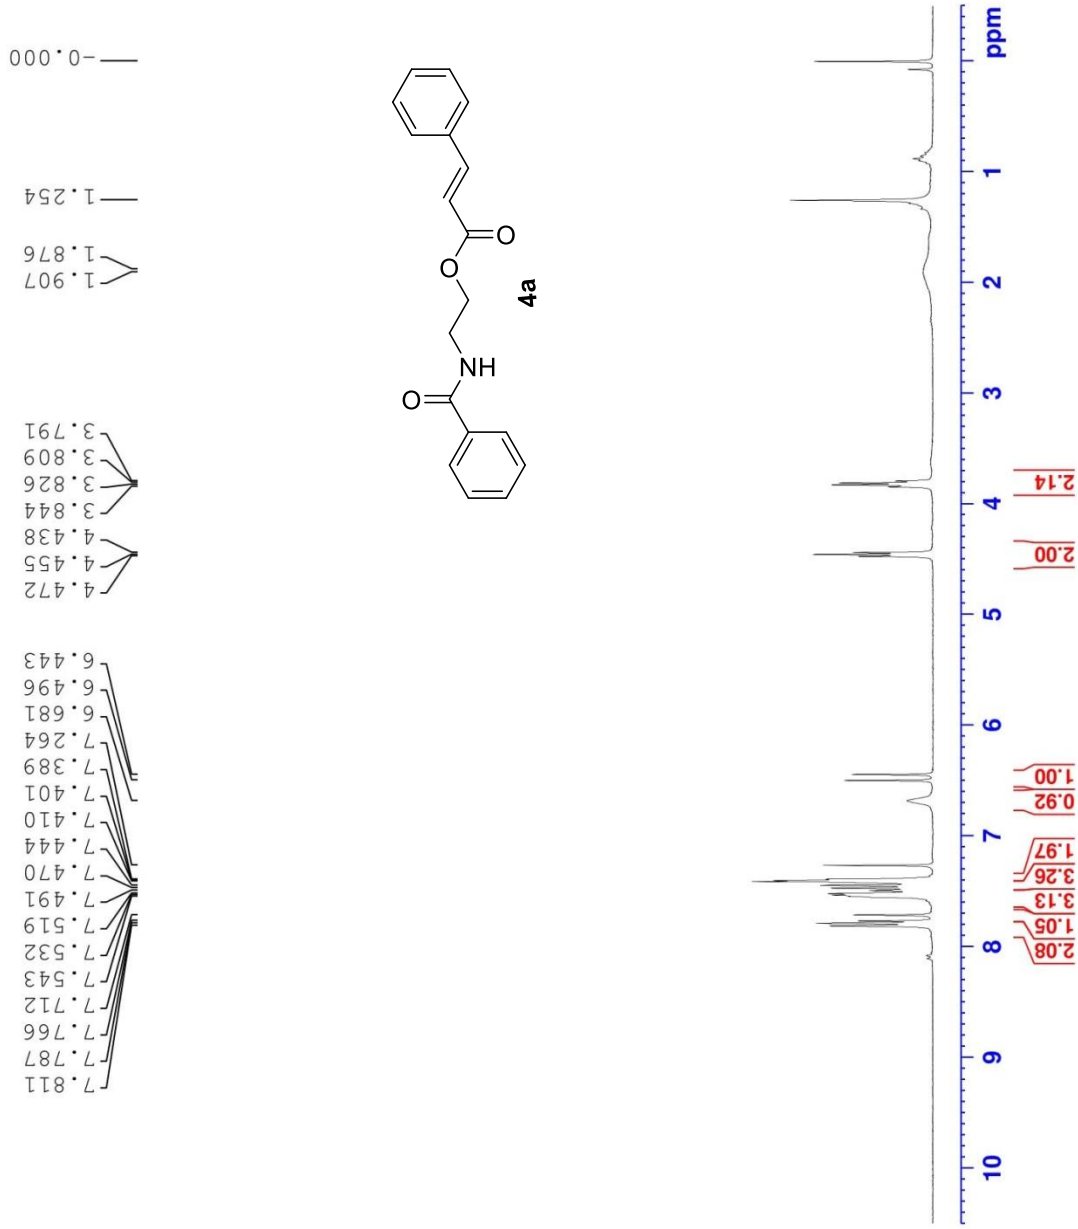

7.806  
 7.783  
 7.678  
 7.622  
 7.537  
 7.520  
 7.511  
 7.503  
 7.497  
 7.475  
 7.456  
 7.450  
 7.432  
 7.297  
 7.270  
 7.263  
 7.245  
 6.611  
 6.487  
 6.434  
 4.470  
 4.454  
 4.436  
 3.843  
 3.825  
 3.809  
 3.790

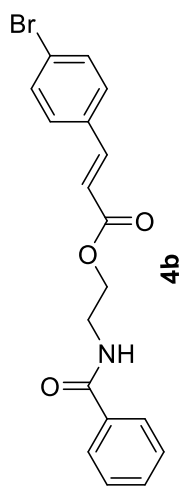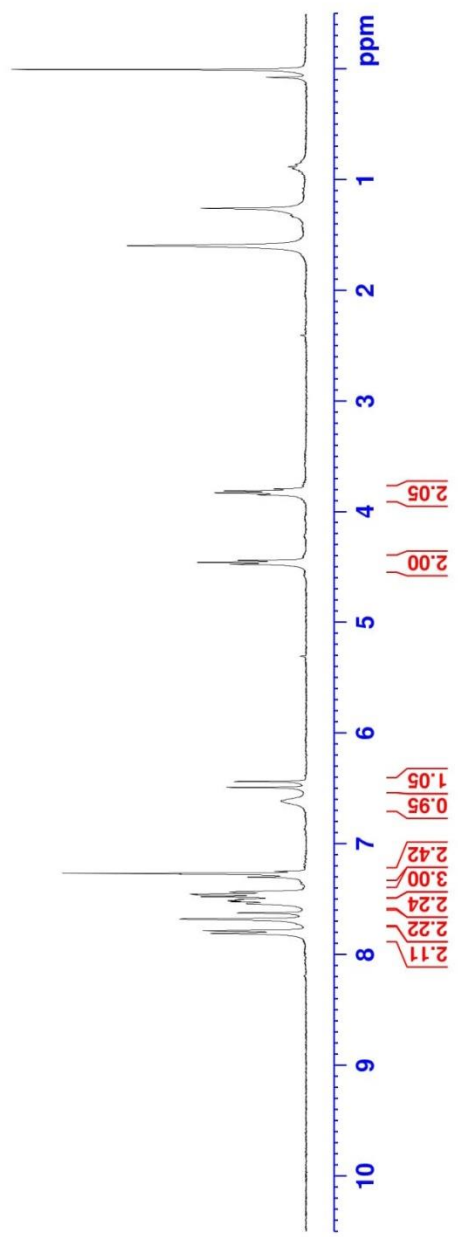

Current Data Parameters  
 NAME H2552E17  
 EXPNO 1  
 PROCNO 1  
 F2 - Acquisition Parameters  
 Date\_ 20181009  
 Time 16.47  
 INSTRUM spect  
 PROBHD 5 mm BBO BB-1H  
 PULPROG zg30  
 TD 65536  
 SOLVENT CDCl3  
 NS 16  
 DS 2  
 SWH 6009.615 Hz  
 FIDRES 0.091699 Hz  
 AQ 5.4525952 sec  
 RG 406  
 DW 83.200 usec  
 DE 6.50 usec  
 TE 298.0 K  
 D1 1.00000000 sec  
 TD0 1  
 ===== CHANNEL f1 =====  
 SFO1 300.1318534 MHz  
 NUC1 1H  
 P1 13.00 usec  
 PLW1 10.69999981 W  
 F2 - Processing parameters  
 SI 65536  
 SF 300.1300057 MHz  
 WDW EM  
 SSB 0  
 LB 0  
 GB 0  
 PC 1.00

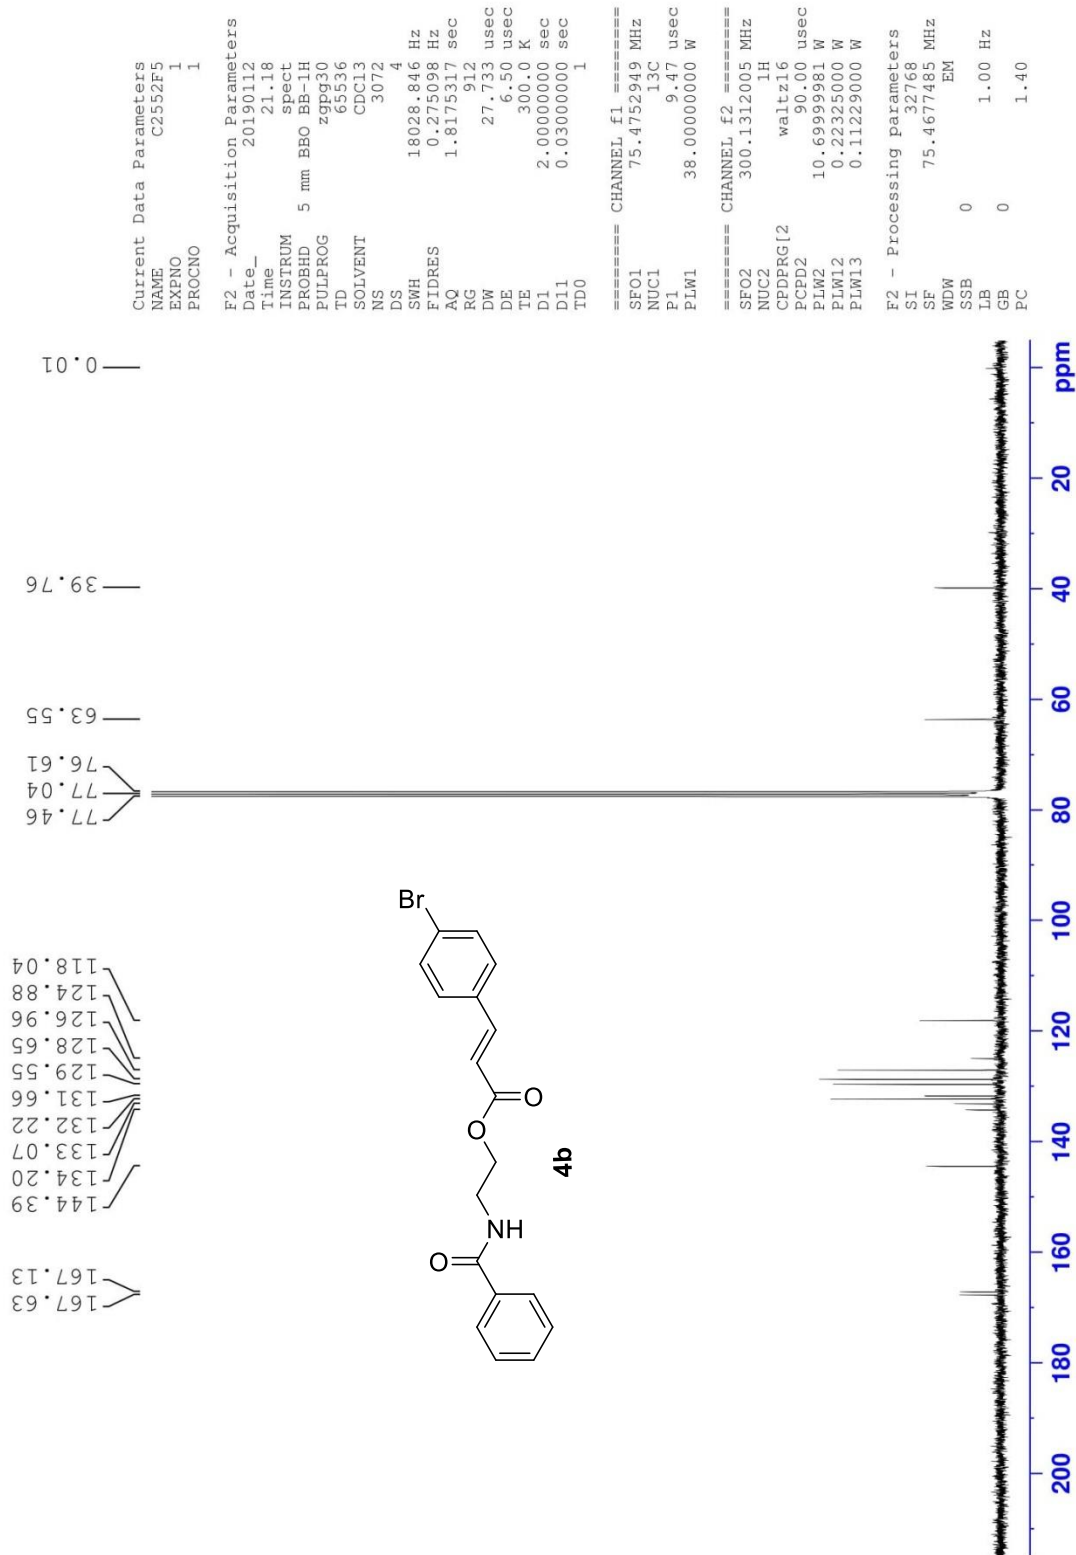

# UOH -SCHOOL OF CHEMISTRY -HRMS

## Analysis Info

Analysis Name D:\Data\2018\PROF MP\DEC\10r.d  
 Method tune\_low\_PosR.m  
 Sample Name -10-DCM-MEOH  
 Comment

Acquisition Date 12/12/2018 1:44:54 PM

Operator UOH-Chemistry  
 Instrument maXis 10138

## Acquisition Parameter

Source Type ESI  
 Focus Not active  
 Scan Begin 100 m/z  
 Scan End 2500 m/z

Ion Polarity Positive  
 Set Capillary 3800 V  
 Set End Plate Offset -500 V  
 Set Collision Cell RF 350.0 Vpp

Set Nebulizer 0.3 Bar  
 Set Dry Heater 250 °C  
 Set Dry Gas 5.0 l/min  
 Set Divert Valve Waste

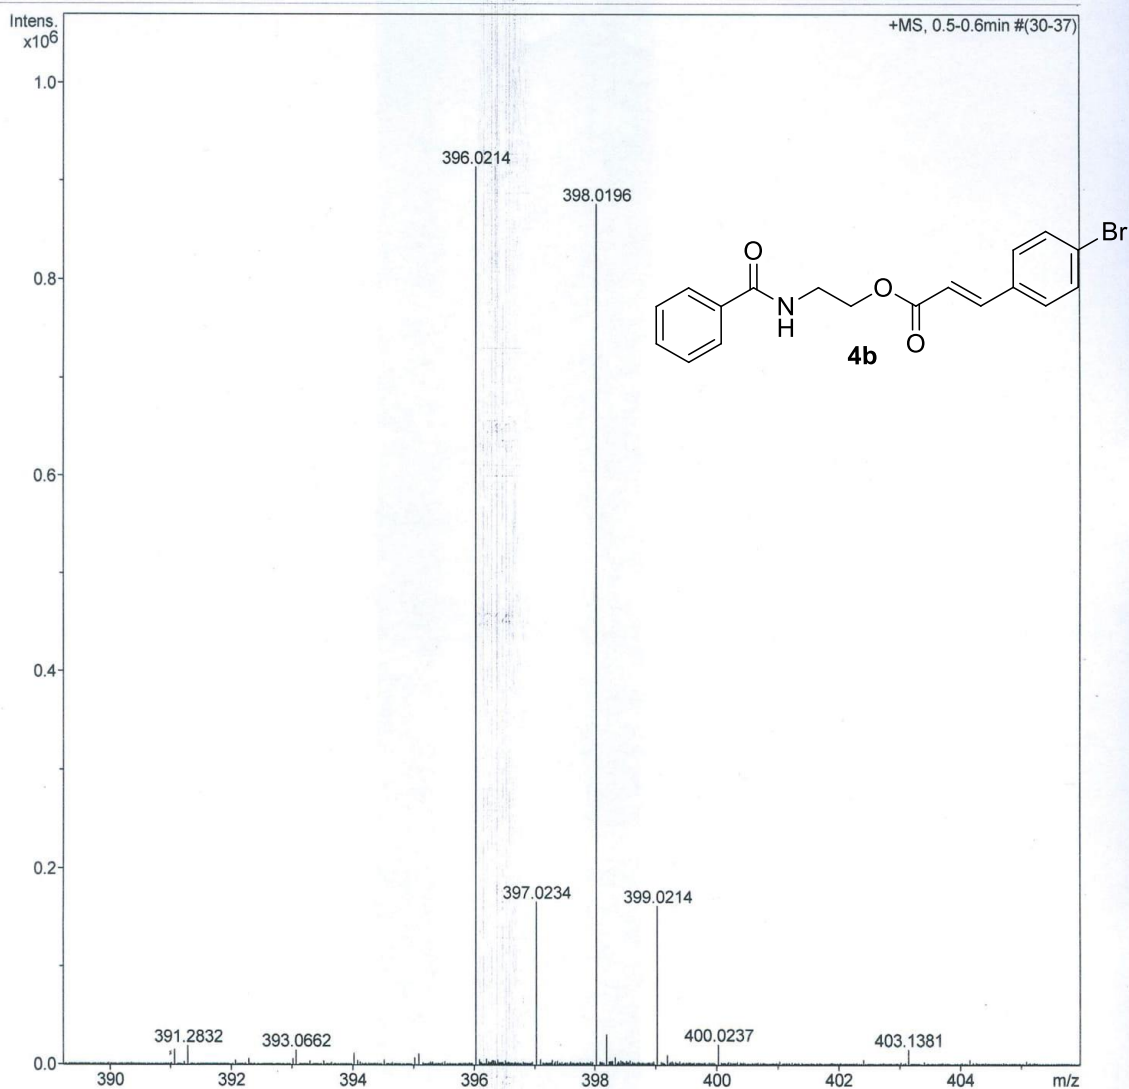

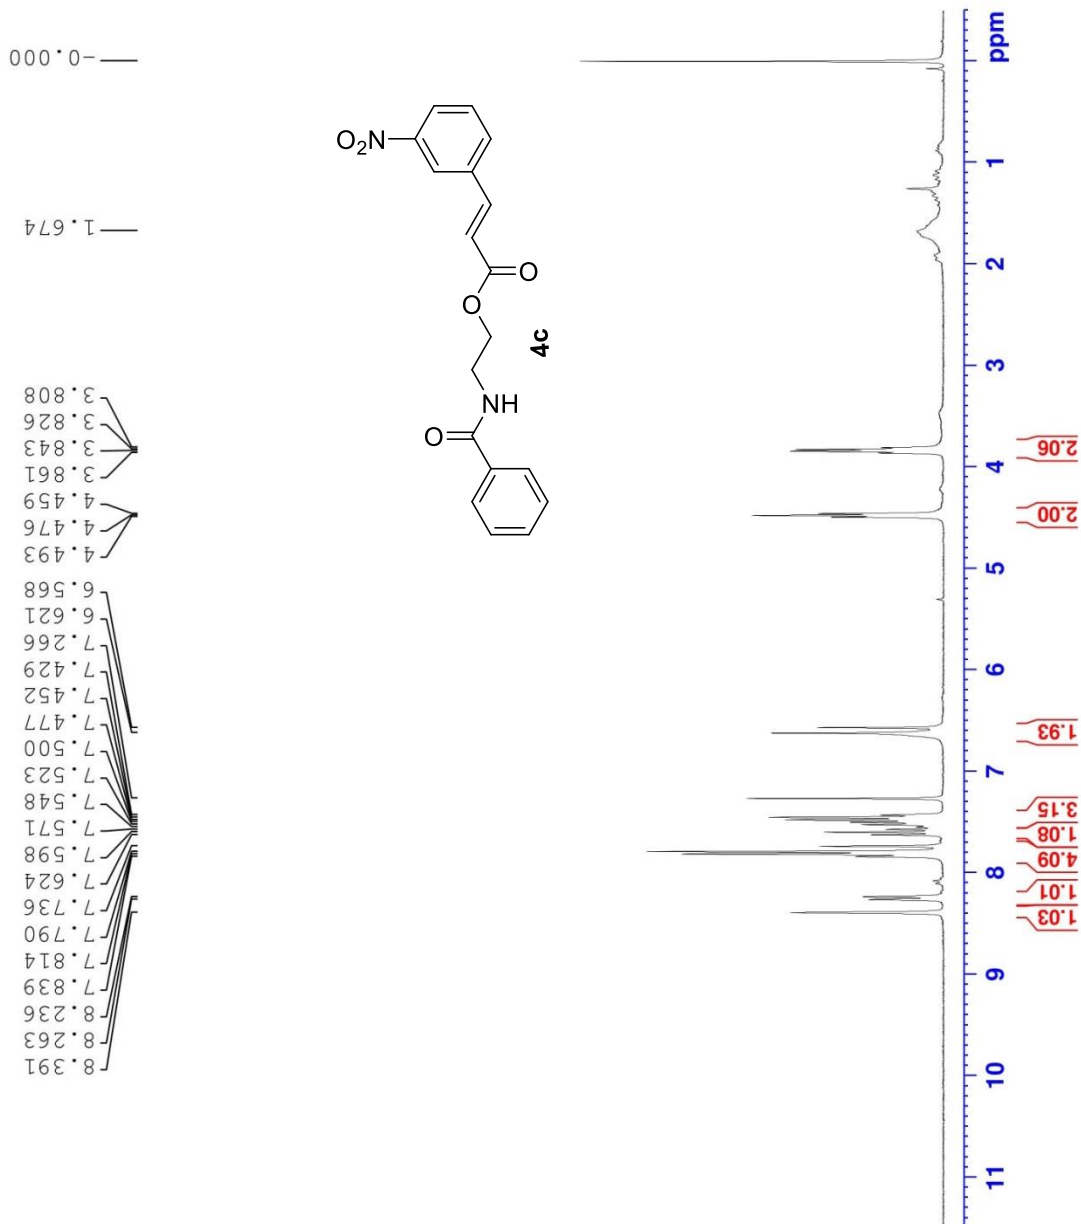

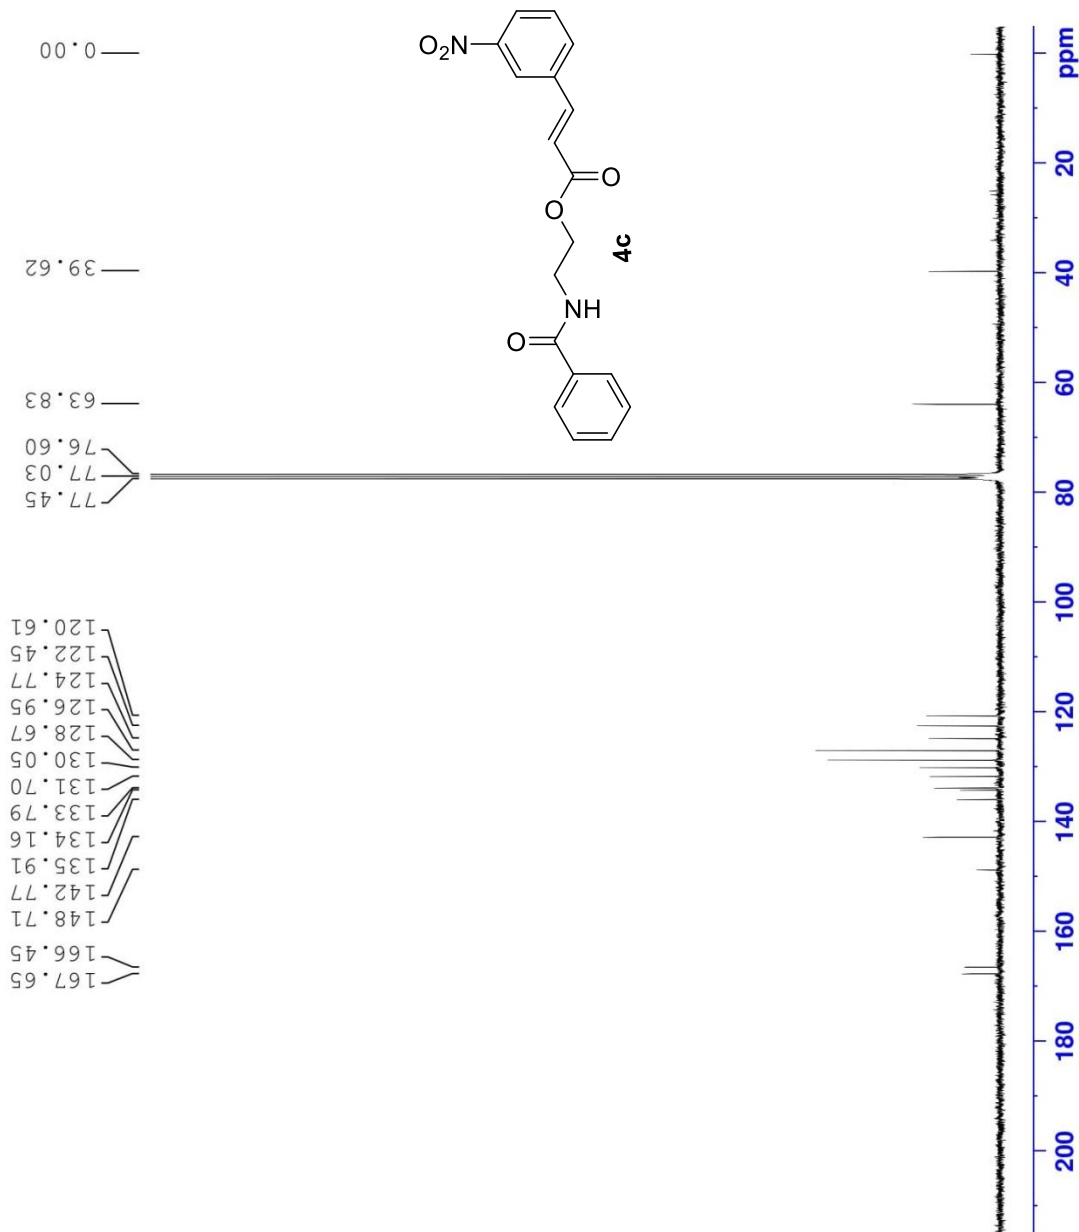

# UOH -SCHOOL OF CHEMISTRY -HRMS

## Analysis Info

Analysis Name D:\Data\2018\PROF MP\DEC\11.d  
 Method tune\_low.m  
 Sample Name 11  
 Comment

Acquisition Date 12/11/2018 4:38:54 PM

Operator UOH-Chemistry  
 Instrument maXis 10138

## Acquisition Parameter

|             |            |                       |           |                  |           |
|-------------|------------|-----------------------|-----------|------------------|-----------|
| Source Type | ESI        | Ion Polarity          | Positive  | Set Nebulizer    | 0.4 Bar   |
| Focus       | Not active | Set Capillary         | 3800 V    | Set Dry Heater   | 200 °C    |
| Scan Begin  | 50 m/z     | Set End Plate Offset  | -500 V    | Set Dry Gas      | 6.0 l/min |
| Scan End    | 1800 m/z   | Set Collision Cell RF | 350.0 Vpp | Set Divert Valve | Waste     |

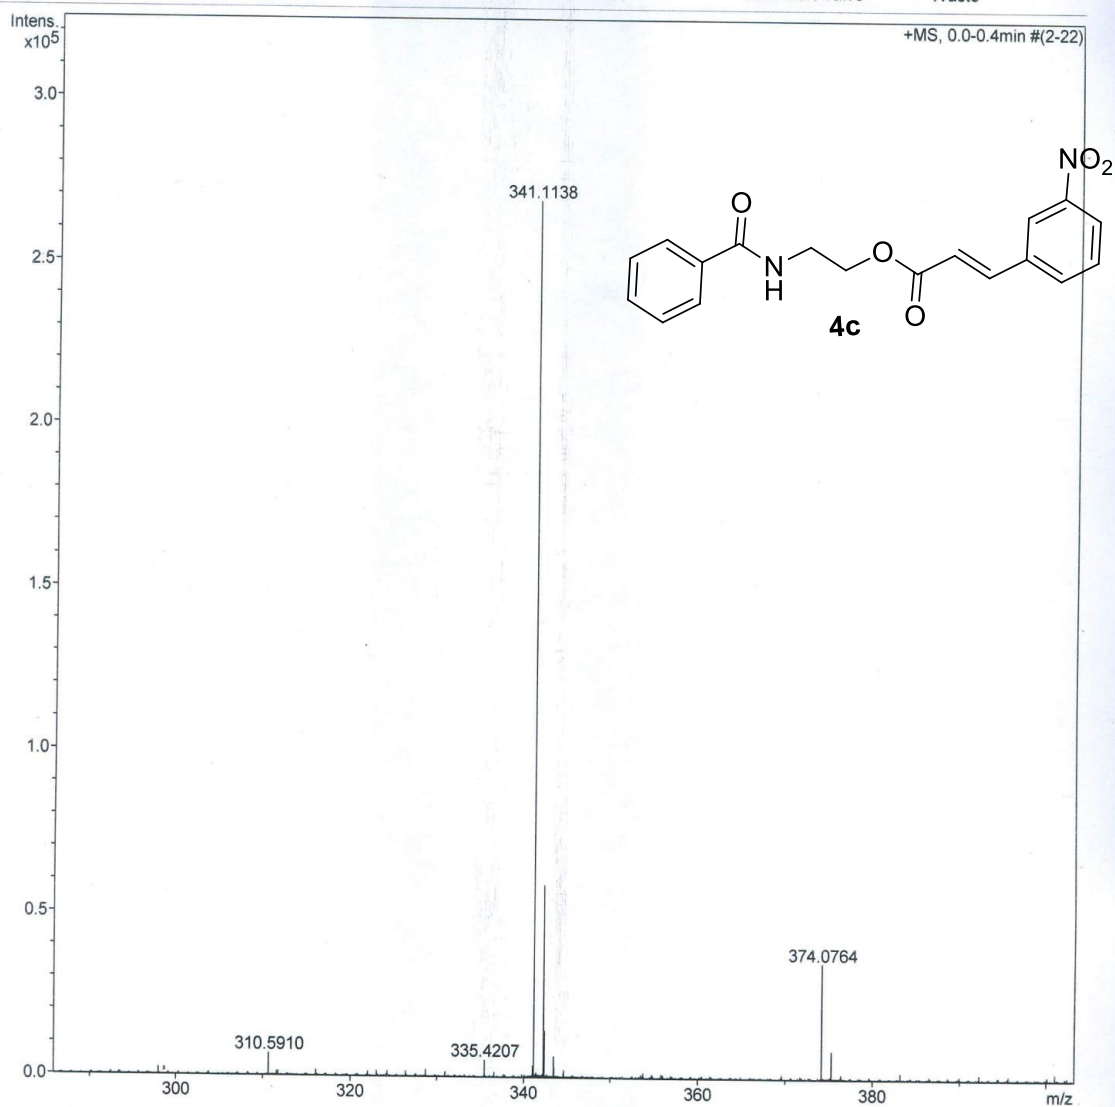

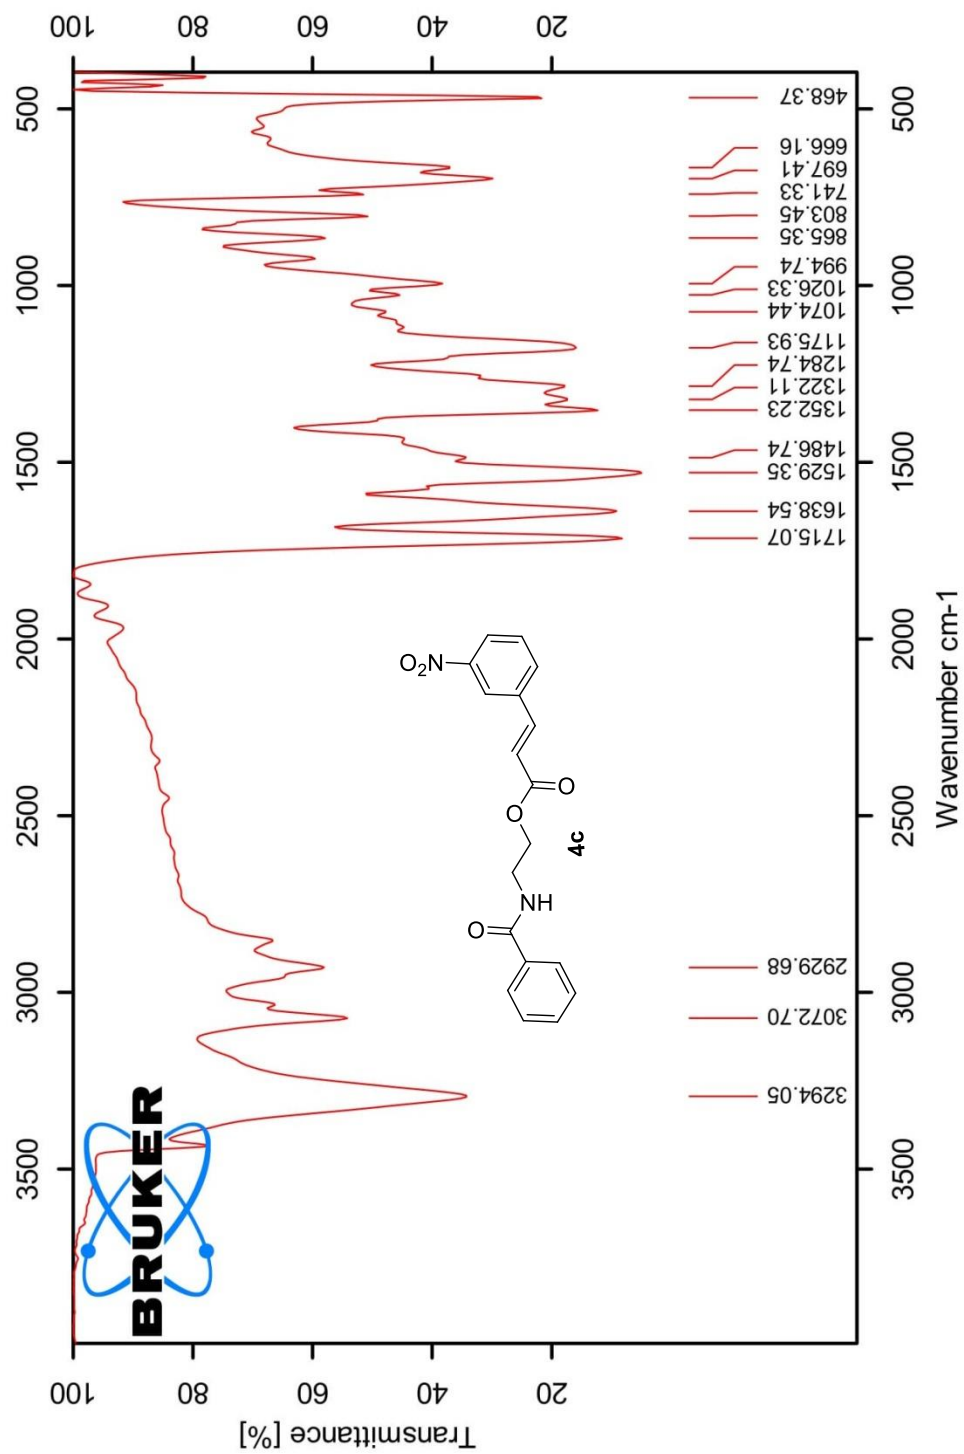

SAMPLE : PVS 1  
 TECHNIQUE : Thinfilm  
 USER : Default

SAMPLE SCANS : 48  
 DATE : 11-03-2019  
 TIME : 18:39:31





# UOH -SCHOOL OF CHEMISTRY -HRMS

## Analysis Info

Analysis Name D:\Data\2018\PROF MP\DEC\12.d  
 Method tune\_low.m  
 Sample Name 12  
 Comment

Acquisition Date 12/11/2018 4:39:23 PM

Operator UOH-Chemistry  
 Instrument maXis 10138

## Acquisition Parameter

|             |            |                       |           |                  |           |
|-------------|------------|-----------------------|-----------|------------------|-----------|
| Source Type | ESI        | Ion Polarity          | Positive  | Set Nebulizer    | 0.4 Bar   |
| Focus       | Not active | Set Capillary         | 3800 V    | Set Dry Heater   | 200 °C    |
| Scan Begin  | 50 m/z     | Set End Plate Offset  | -500 V    | Set Dry Gas      | 6.0 l/min |
| Scan End    | 1800 m/z   | Set Collision Cell RF | 350.0 Vpp | Set Divert Valve | Waste     |

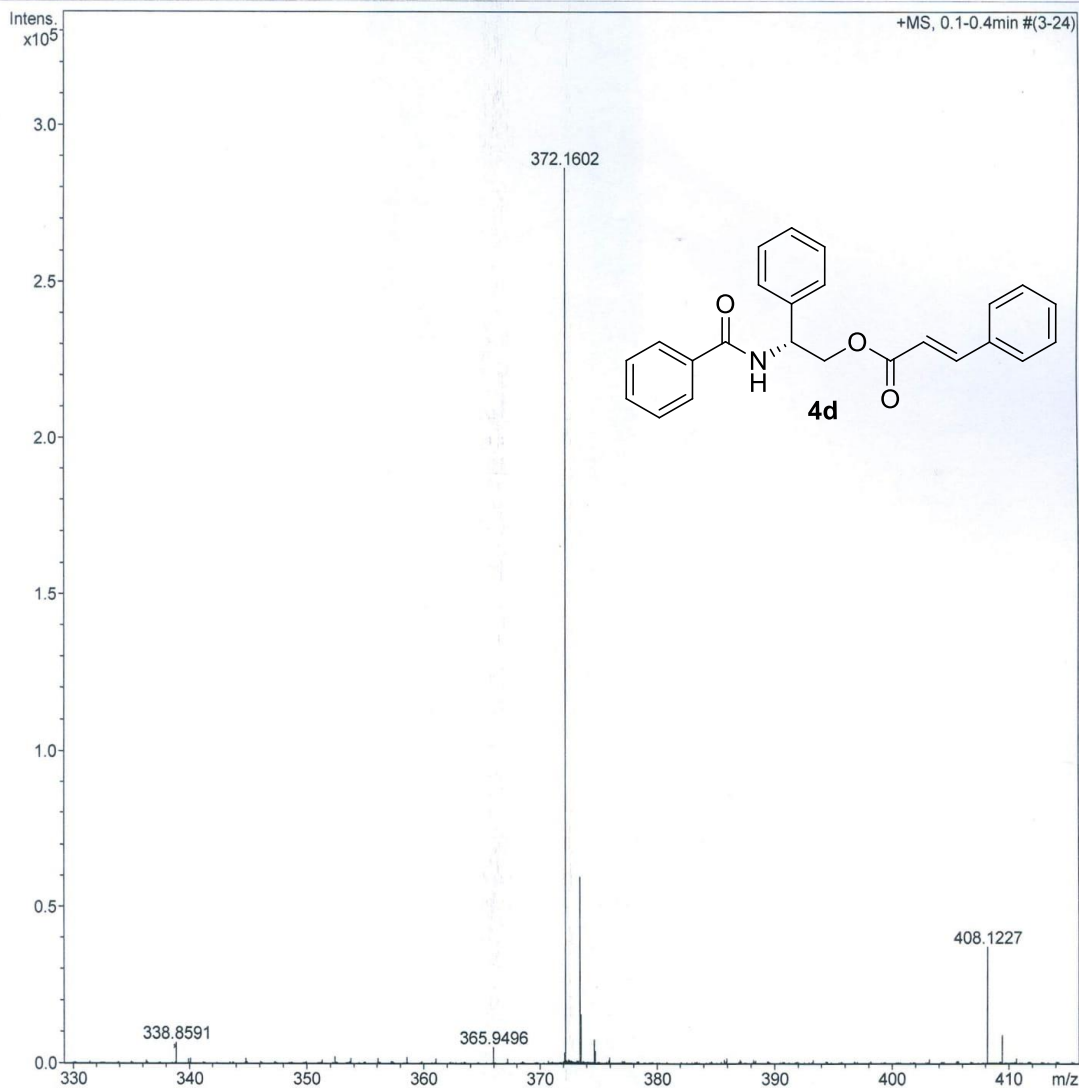





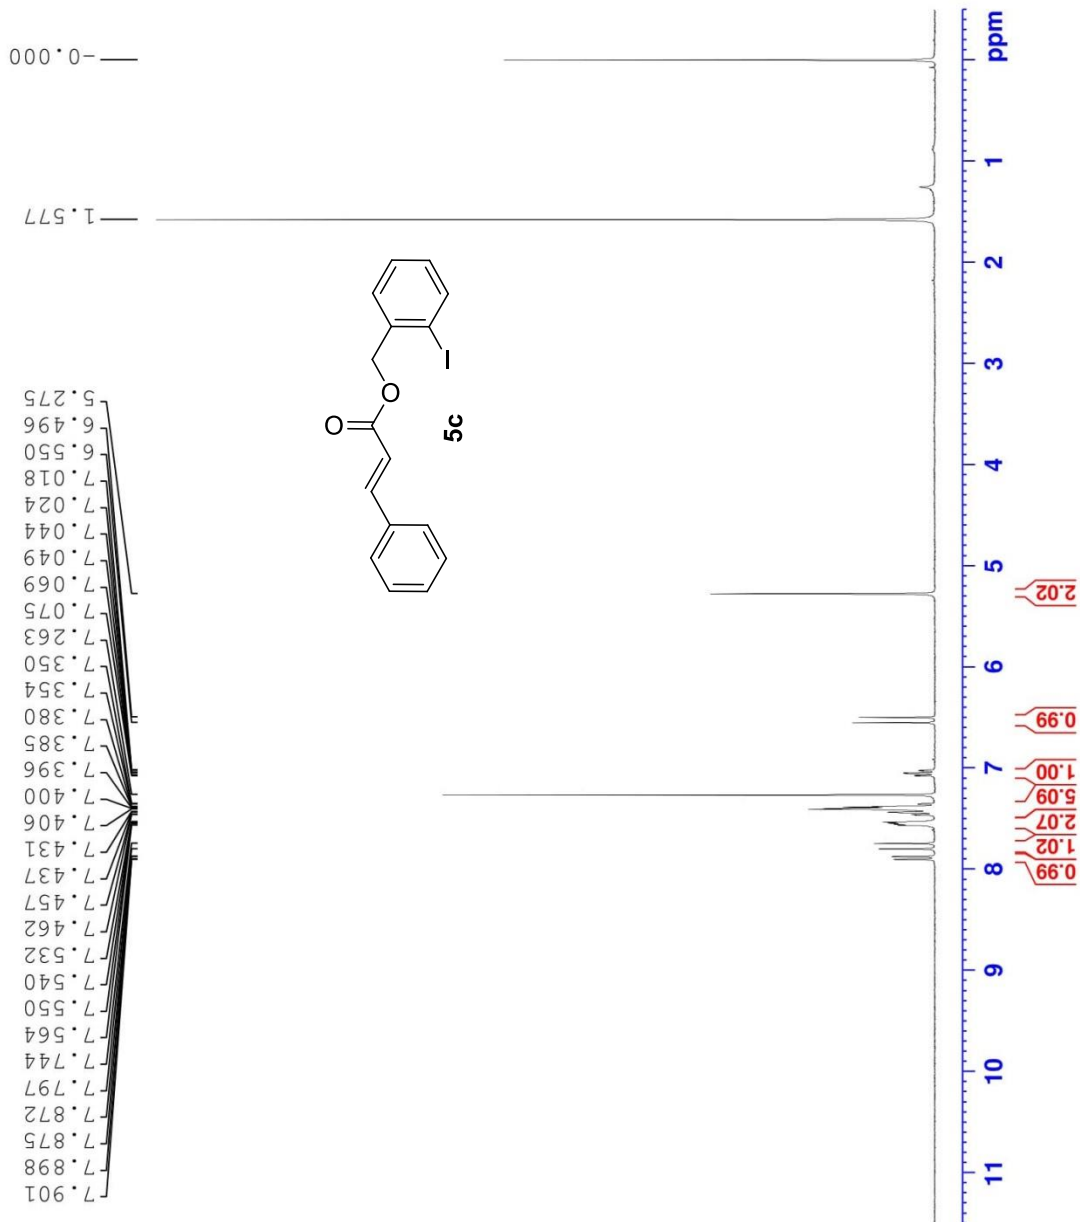

Supplement: c9nj00134d1.pdf [file c9nj00134d1.pdf]
